# Supplementary material
Source: PubMed Central journal article supplement (PMC3203620)
Supplement: jo201715x_si_001.pdf [file jo201715x_si_001.pdf]

Synthesis of Functionalized Cinnamaldehyde Derivatives by an Oxidative Heck Reaction and Their Use as Starting Materials for Preparation of *Mycobacterium tuberculosis* 1-Deoxy-D-xylulose-5-phosphate Reductoisomerase Inhibitors

Anneli Nordqvist,<sup>†</sup> Christofer Björkelid,<sup>‡</sup> Mounir Andaloussi,<sup>†</sup> Anna M. Jansson,<sup>‡</sup> Sherry L. Mowbray,<sup>‡</sup> Anders Karlén,<sup>†</sup> Mats Larhed<sup>†,\*</sup>

<sup>†</sup> *Division of Organic Pharmaceutical Chemistry, Department of Medicinal Chemistry, Uppsala University, Biomedical Center, Box 574, SE-751 23 Uppsala, Sweden*

<sup>‡</sup> *Department of Cell and Molecular Biology, Uppsala University, Biomedical Center, Box 596, SE-751 24 Uppsala, Sweden*

\*Corresponding author: mats.larhed@orgfarm.uu.se

## Table of Contents

|                                                                               |    |
|-------------------------------------------------------------------------------|----|
| <sup>1</sup> H NMR and <sup>13</sup> C NMR <b>6a</b> .....                    | 4  |
| GC-MS and <sup>1</sup> H NMR <b>6b</b> .....                                  | 5  |
| GC-MS and <sup>1</sup> H NMR <b>6c</b> .....                                  | 7  |
| GC-MS and <sup>1</sup> H NMR <b>6d</b> .....                                  | 9  |
| GC-MS and <sup>1</sup> H NMR <b>6e</b> .....                                  | 11 |
| GC-MS, <sup>1</sup> H NMR and <sup>13</sup> C NMR <b>6f</b> .....             | 13 |
| GC-MS, <sup>1</sup> H NMR and <sup>13</sup> C NMR <b>6g</b> .....             | 15 |
| GC-MS, <sup>1</sup> H NMR, <sup>13</sup> C NMR, HMBC and HSQC <b>6h</b> ..... | 17 |
| HPLC-MS, <sup>1</sup> H NMR and <sup>13</sup> C NMR <b>6i</b> .....           | 23 |
| GC-MS and <sup>1</sup> H NMR <b>6j</b> .....                                  | 25 |

|                                                                      |    |
|----------------------------------------------------------------------|----|
| GC-MS and <sup>1</sup> H NMR <b>6k</b> .....                         | 27 |
| GC-MS, <sup>1</sup> H NMR and <sup>13</sup> C NMR <b>6l</b> .....    | 29 |
| GC-MS and <sup>1</sup> H NMR <b>6m</b> .....                         | 31 |
| GC-MS and <sup>1</sup> H NMR <b>6n</b> .....                         | 33 |
| <sup>1</sup> H NMR and <sup>13</sup> C NMR <b>10a</b> .....          | 35 |
| <sup>1</sup> H NMR and <sup>13</sup> C NMR <b>10b</b> .....          | 36 |
| <sup>1</sup> H NMR and <sup>13</sup> C NMR <b>10c</b> .....          | 37 |
| <sup>1</sup> H NMR and <sup>13</sup> C NMR <b>10d</b> .....          | 38 |
| <sup>1</sup> H NMR and <sup>13</sup> C NMR <b>10e</b> .....          | 39 |
| <sup>1</sup> H NMR and <sup>13</sup> C NMR <b>11a</b> .....          | 40 |
| <sup>1</sup> H NMR and <sup>13</sup> C NMR <b>11b</b> .....          | 41 |
| <sup>1</sup> H NMR and <sup>13</sup> C NMR <b>11c</b> .....          | 42 |
| <sup>1</sup> H NMR and <sup>13</sup> C NMR <b>11d</b> .....          | 43 |
| <sup>1</sup> H NMR and <sup>13</sup> C NMR <b>11e</b> .....          | 44 |
| <sup>1</sup> H NMR and <sup>13</sup> C NMR <b>11f</b> .....          | 45 |
| <sup>1</sup> H NMR and <sup>13</sup> C NMR <b>11g</b> .....          | 46 |
| <sup>1</sup> H NMR and <sup>13</sup> C NMR <b>11h</b> .....          | 47 |
| <sup>1</sup> H NMR and <sup>13</sup> C NMR <b>11i</b> .....          | 48 |
| <sup>1</sup> H NMR and <sup>13</sup> C NMR <b>11j</b> .....          | 49 |
| <sup>1</sup> H NMR and <sup>13</sup> C NMR <b>11k</b> .....          | 50 |
| <sup>1</sup> H NMR and <sup>13</sup> C NMR <b>12a</b> .....          | 51 |
| <sup>1</sup> H NMR and <sup>13</sup> C NMR <b>12b</b> .....          | 52 |
| <sup>1</sup> H NMR and <sup>13</sup> C NMR <b>12c</b> .....          | 53 |
| <sup>1</sup> H NMR and <sup>13</sup> C NMR <b>12d</b> .....          | 54 |
| <sup>1</sup> H NMR, <sup>13</sup> C NMR and HSQC <b>12e</b> .....    | 55 |
| <sup>1</sup> H NMR and <sup>13</sup> C NMR <b>12f</b> .....          | 58 |
| <sup>1</sup> H NMR and <sup>13</sup> C NMR <b>12g</b> .....          | 59 |
| <sup>1</sup> H NMR and <sup>13</sup> C NMR <b>12h</b> .....          | 60 |
| <sup>1</sup> H NMR and <sup>13</sup> C NMR <b>12i</b> .....          | 61 |
| <sup>1</sup> H NMR and <sup>13</sup> C NMR <b>12j</b> .....          | 62 |
| <sup>1</sup> H NMR and <sup>13</sup> C NMR <b>12k</b> .....          | 63 |
| <sup>1</sup> H NMR, <sup>13</sup> C NMR and HPLC-MS <b>13a</b> ..... | 64 |

|                                                                      |    |
|----------------------------------------------------------------------|----|
| <sup>1</sup> H NMR, <sup>13</sup> C NMR and HPLC-MS <b>13b</b> ..... | 66 |
| <sup>1</sup> H NMR, <sup>13</sup> C NMR and HPLC-MS <b>13c</b> ..... | 68 |
| <sup>1</sup> H NMR, <sup>13</sup> C NMR and HPLC-MS <b>13d</b> ..... | 70 |
| <sup>1</sup> H NMR, <sup>13</sup> C NMR and HPLC-MS <b>13e</b> ..... | 72 |
| <sup>1</sup> H NMR, <sup>13</sup> C NMR and HPLC-MS <b>13f</b> ..... | 74 |
| <sup>1</sup> H NMR, <sup>13</sup> C NMR and HPLC-MS <b>13g</b> ..... | 76 |
| <sup>1</sup> H NMR, <sup>13</sup> C NMR and HPLC-MS <b>13h</b> ..... | 78 |
| <sup>1</sup> H NMR, <sup>13</sup> C NMR and HPLC-MS <b>13i</b> ..... | 80 |
| <sup>1</sup> H NMR, <sup>13</sup> C NMR and HPLC-MS <b>13j</b> ..... | 82 |
| <sup>1</sup> H NMR, <sup>13</sup> C NMR and HPLC-MS <b>13k</b> ..... | 84 |

# $^1\text{H}$ NMR and $^{13}\text{C}$ NMR 6a

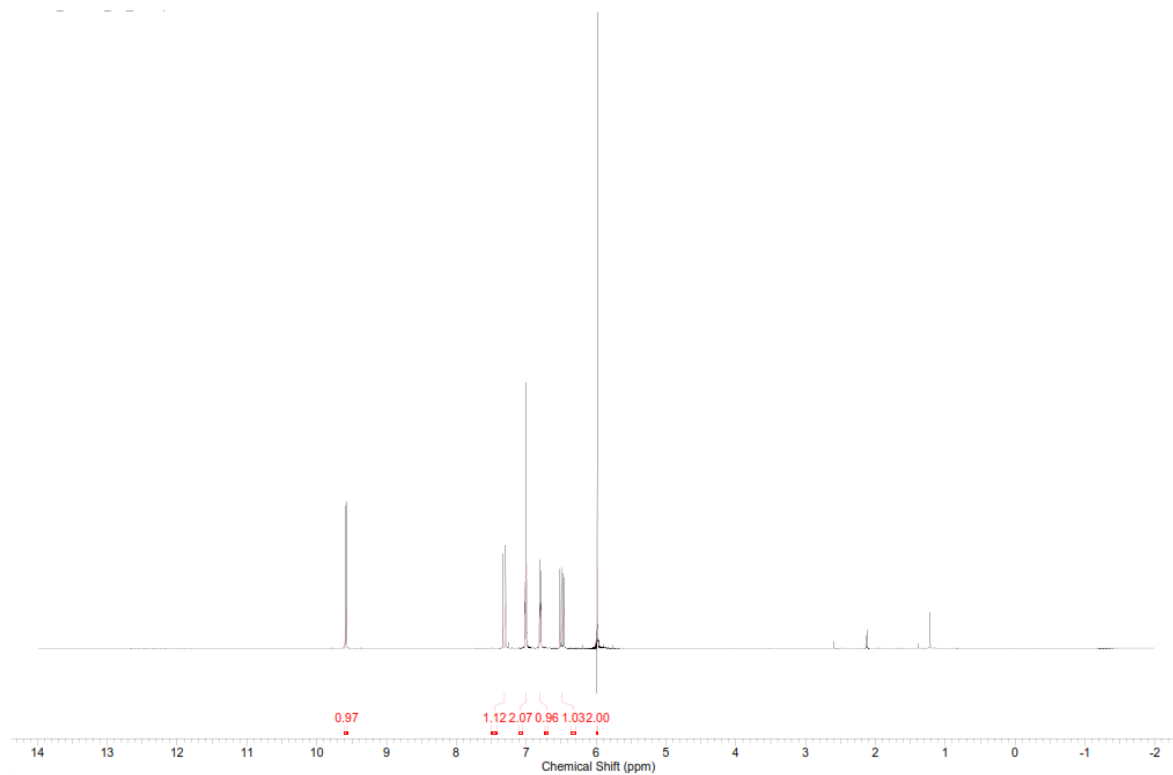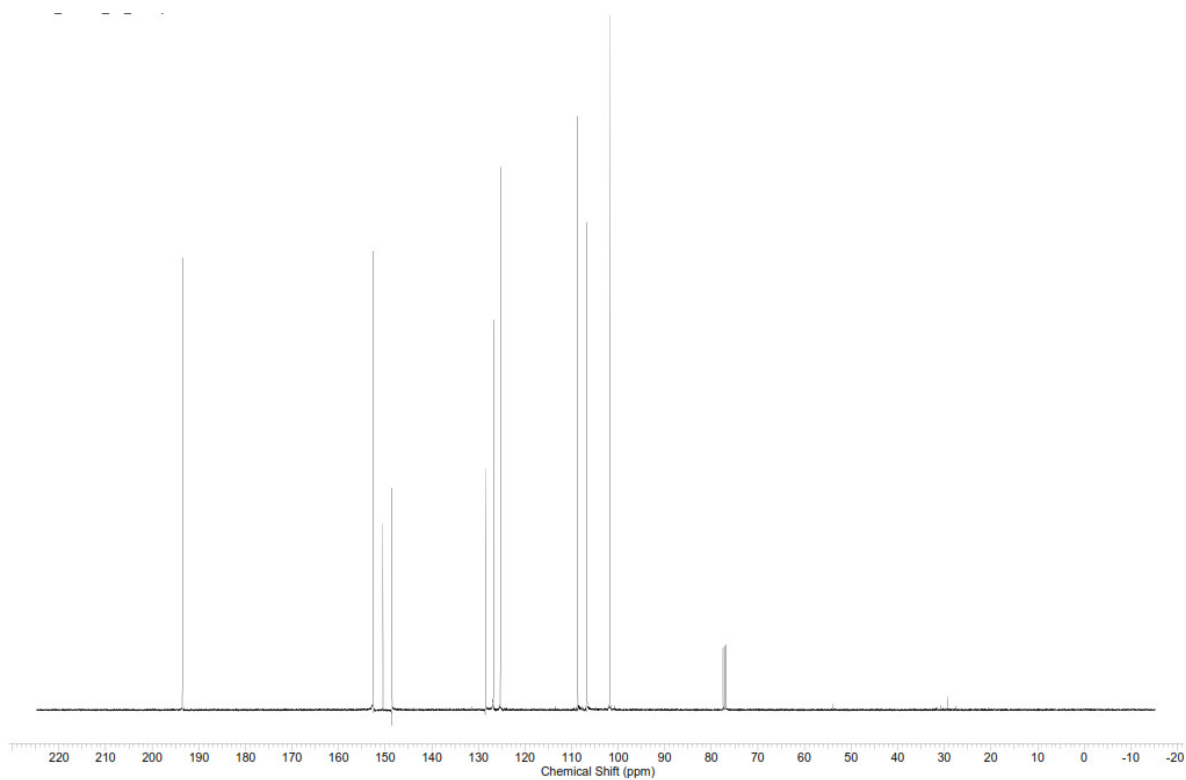

# GC-MS 6b

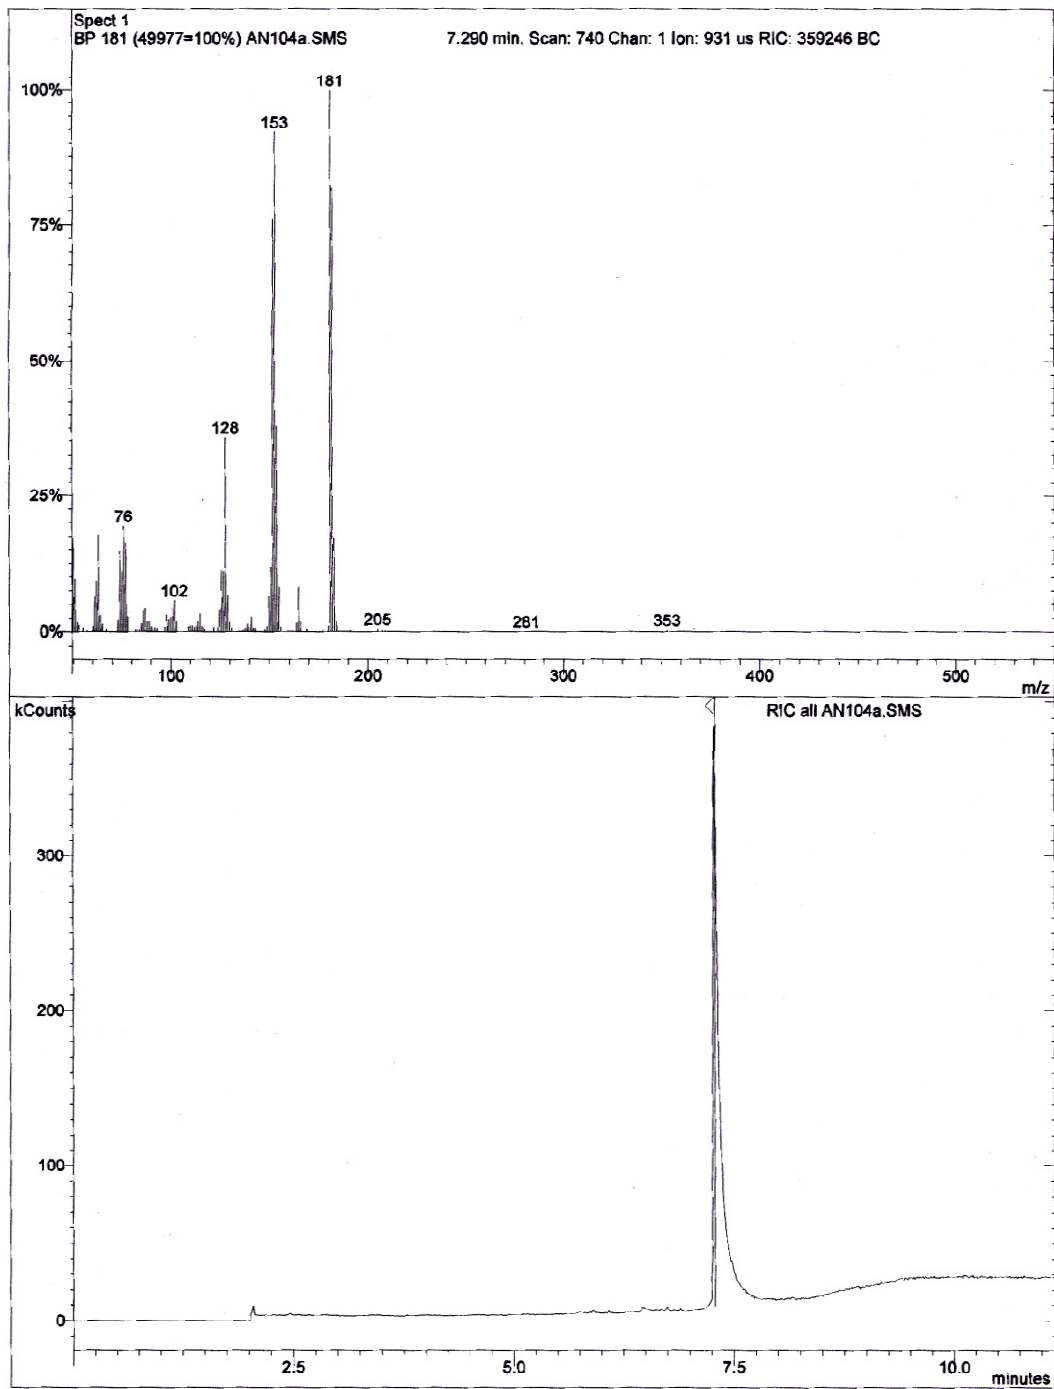

# **<sup>1</sup>H NMR 6b**

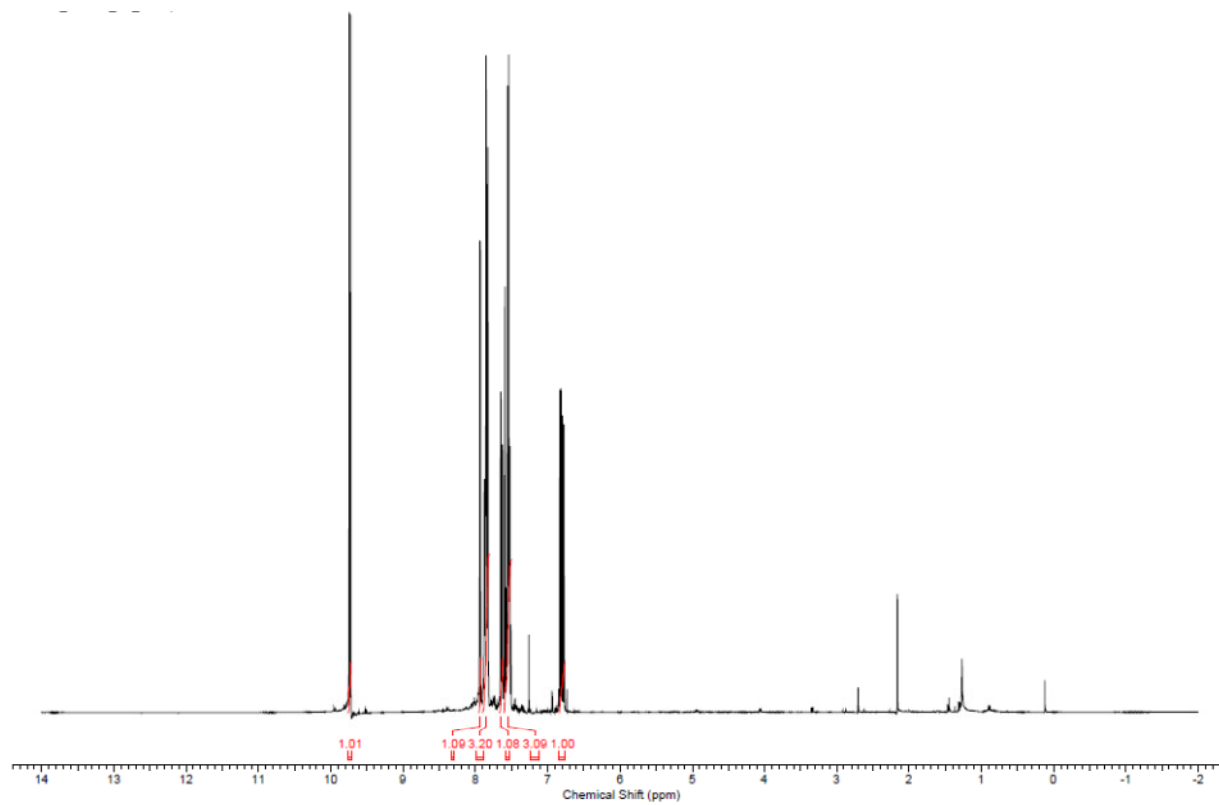

# GC-MS 6c

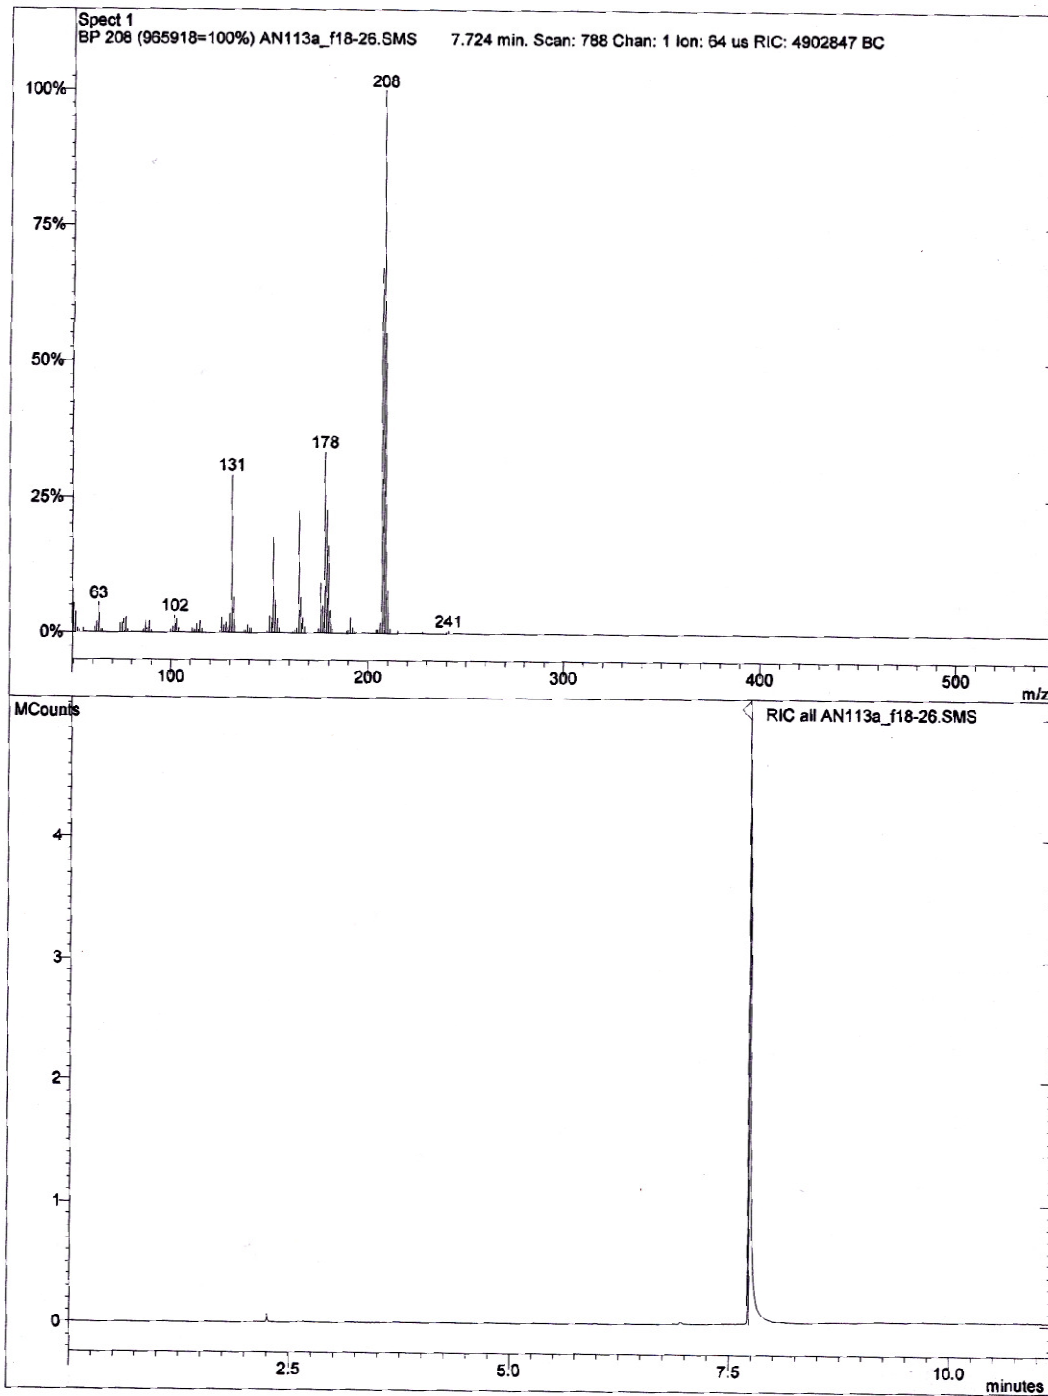

# <sup>1</sup>H NMR 6c

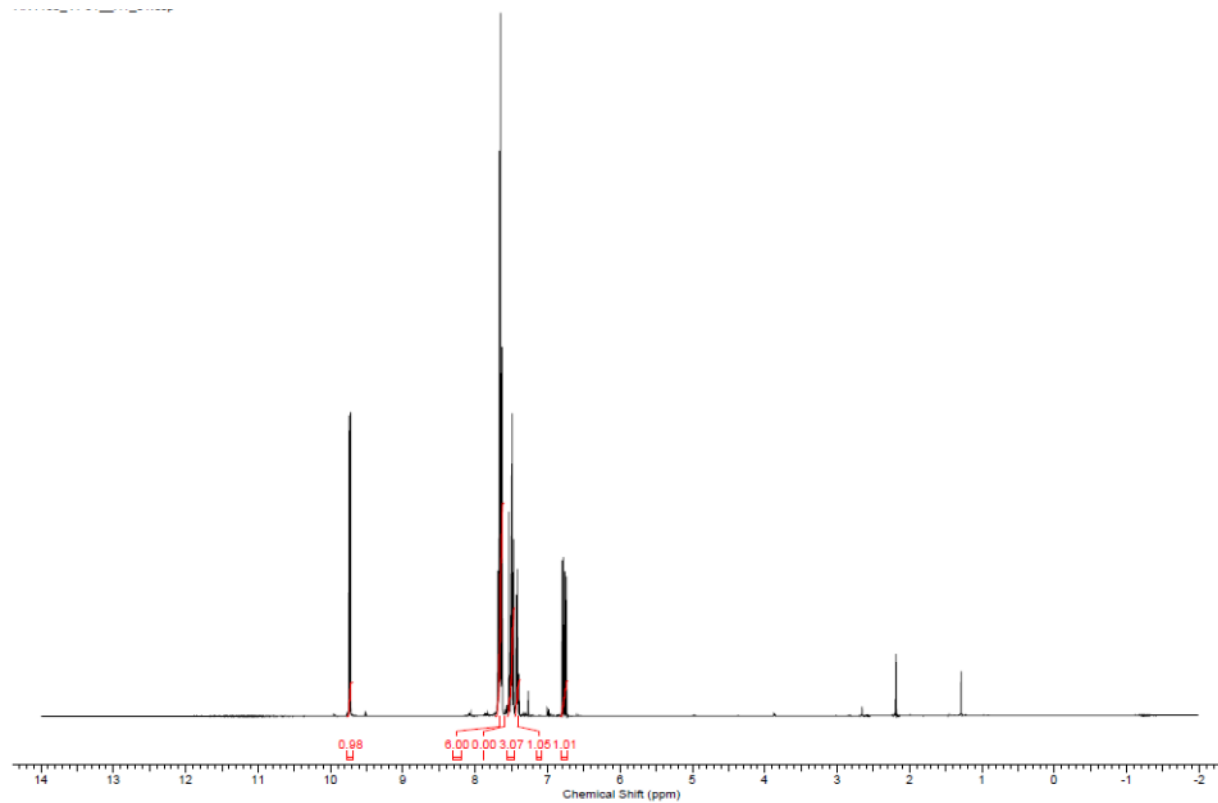



# GC-MS 6d

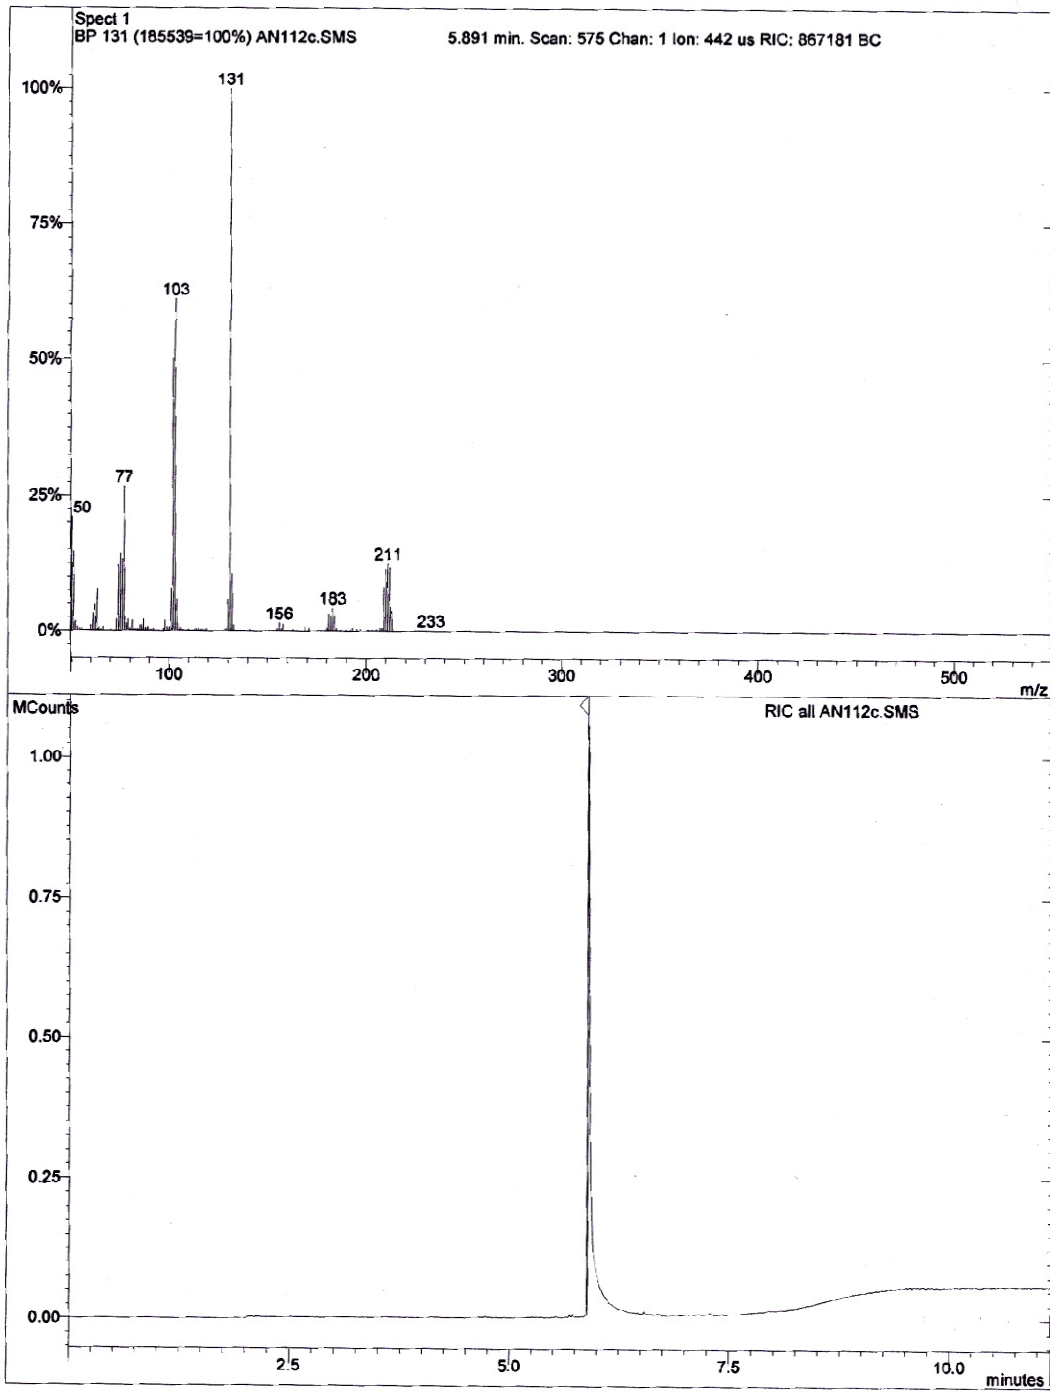

# <sup>1</sup>H NMR 6d

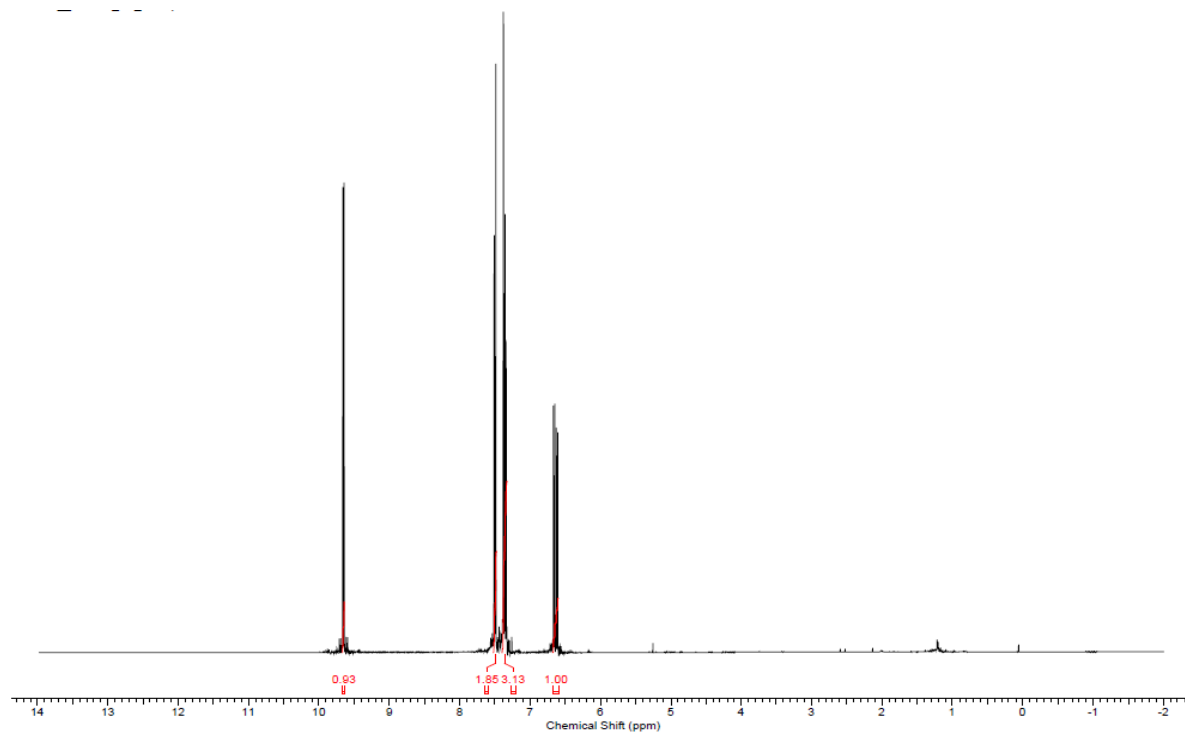

# GC-MS 6e

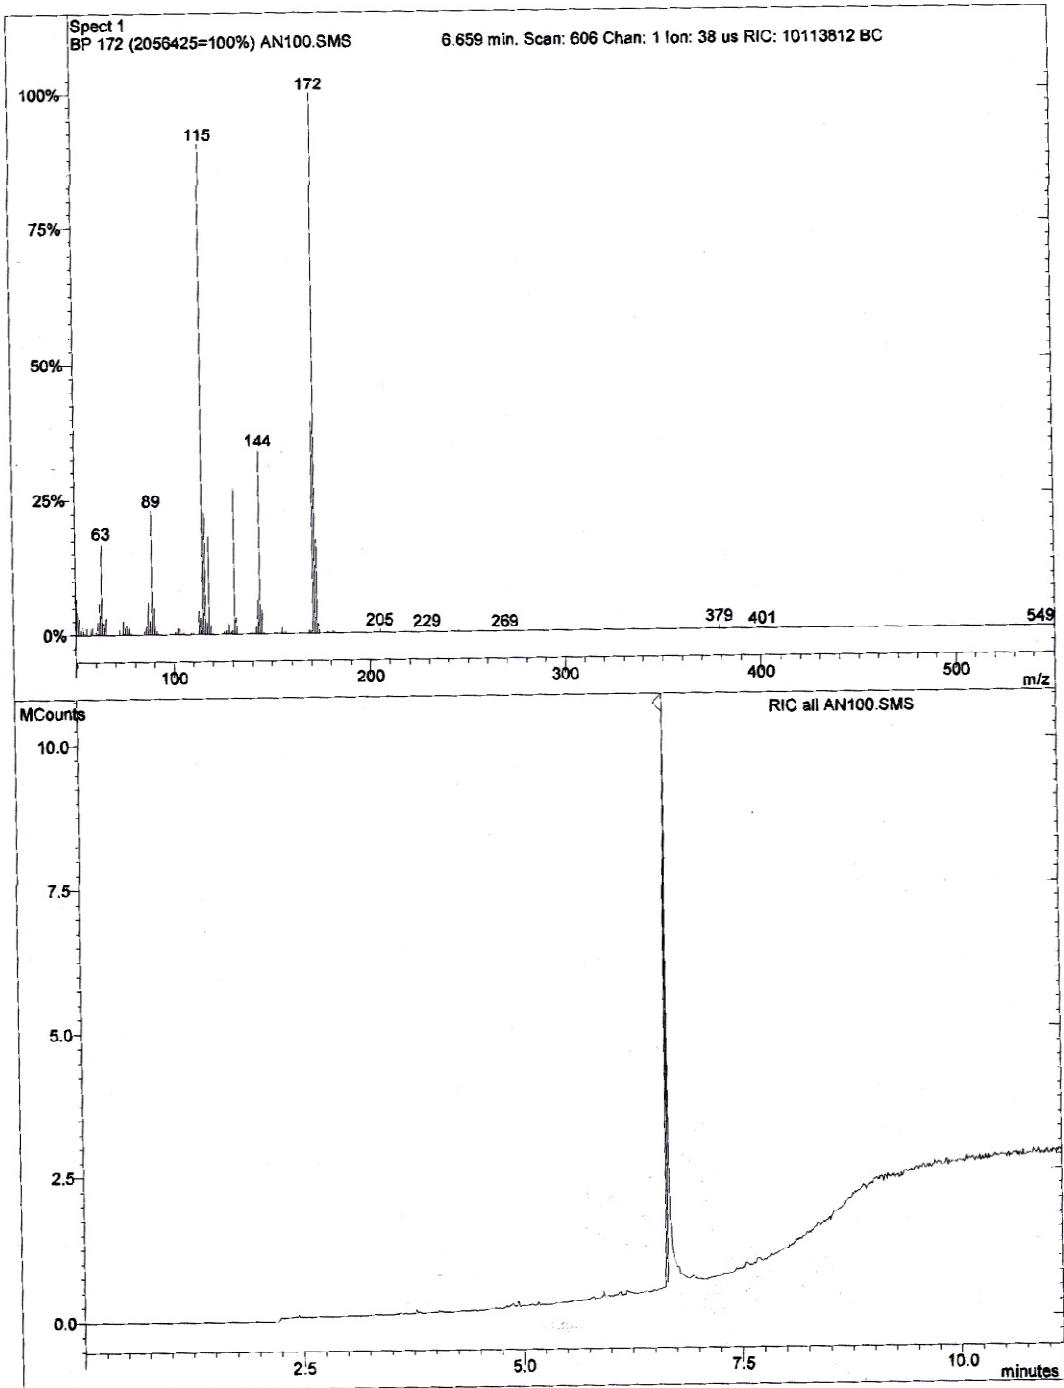

# <sup>1</sup>H NMR 6e

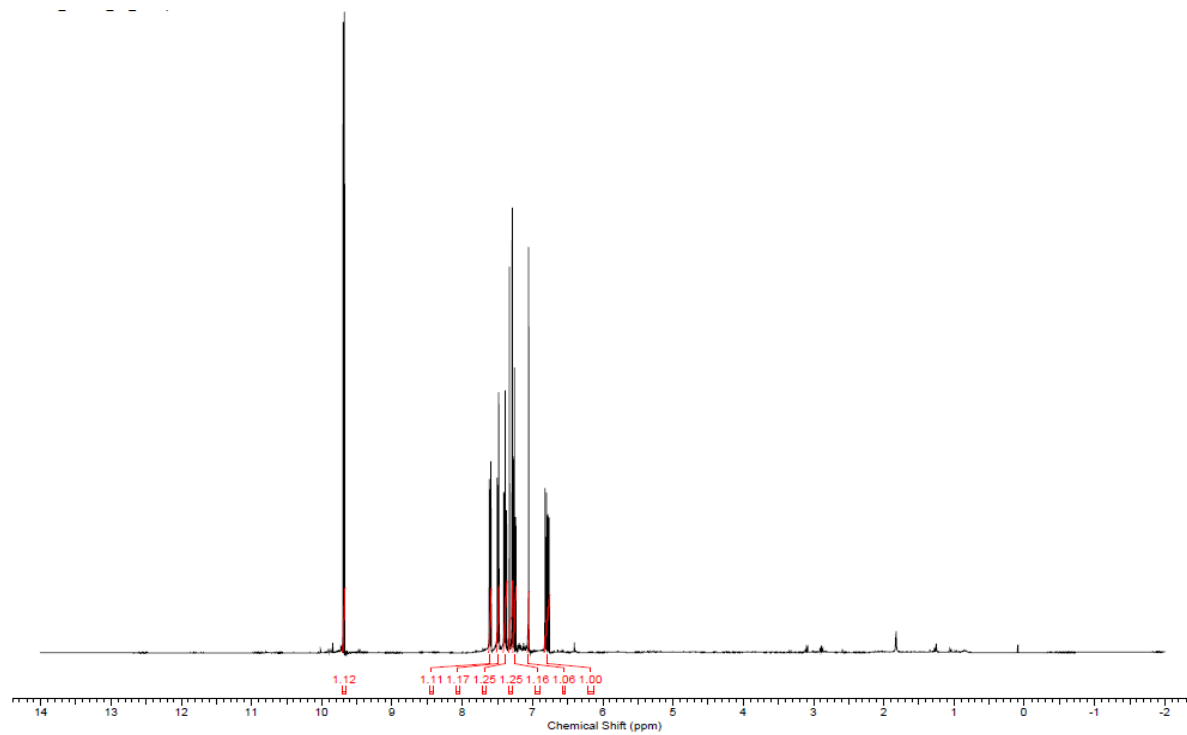

# GC-MS 6f

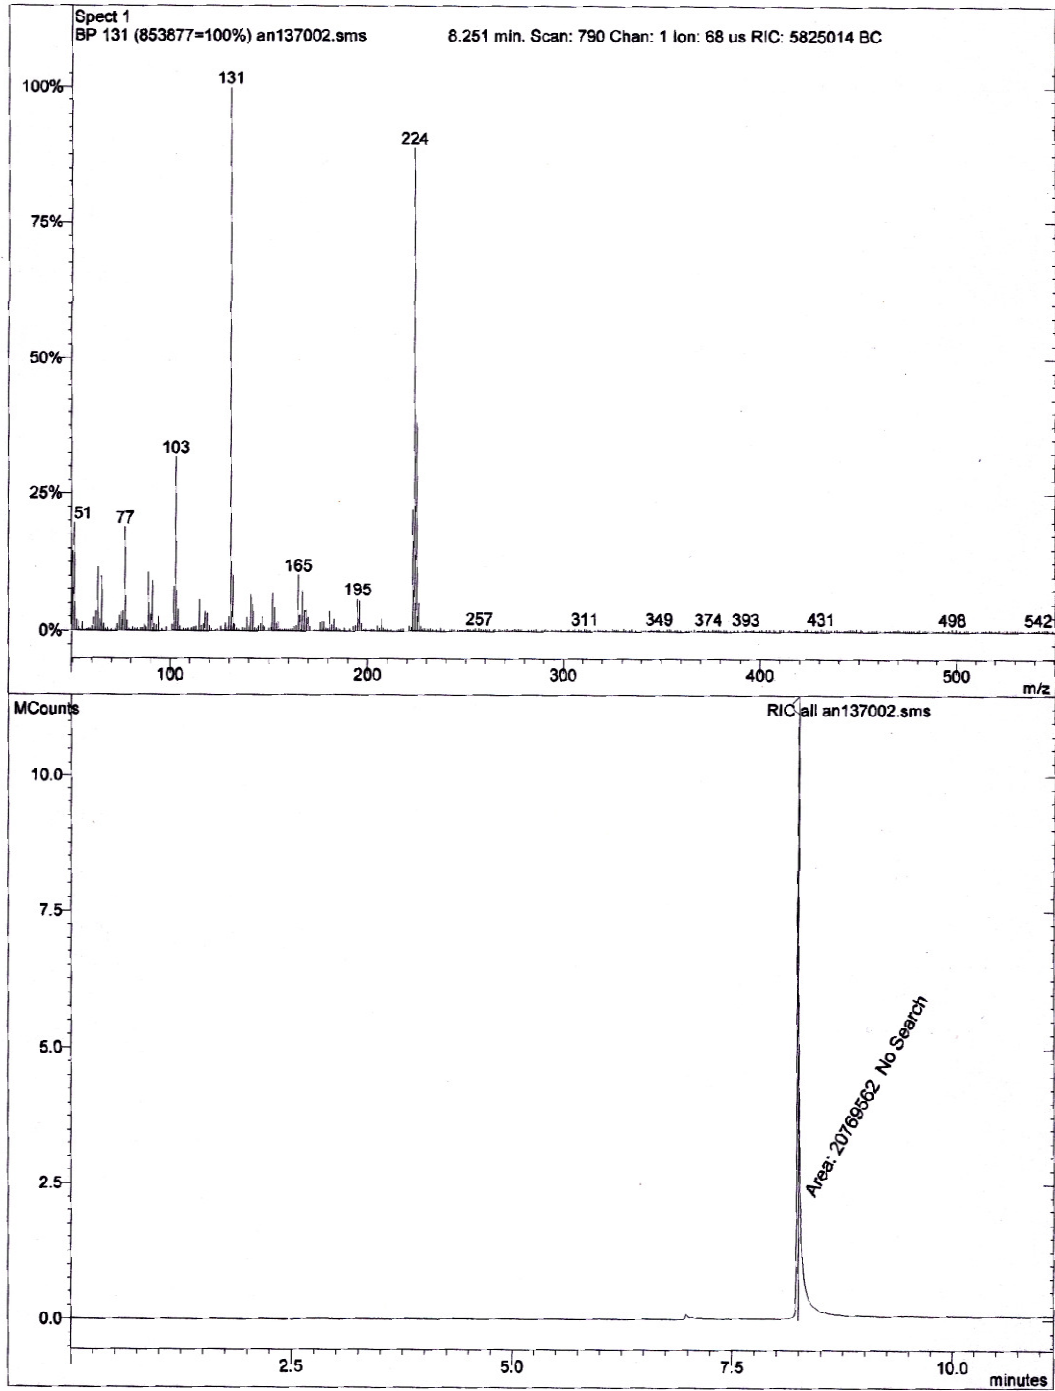

# $^1\text{H}$ NMR and $^{13}\text{C}$ NMR 6f

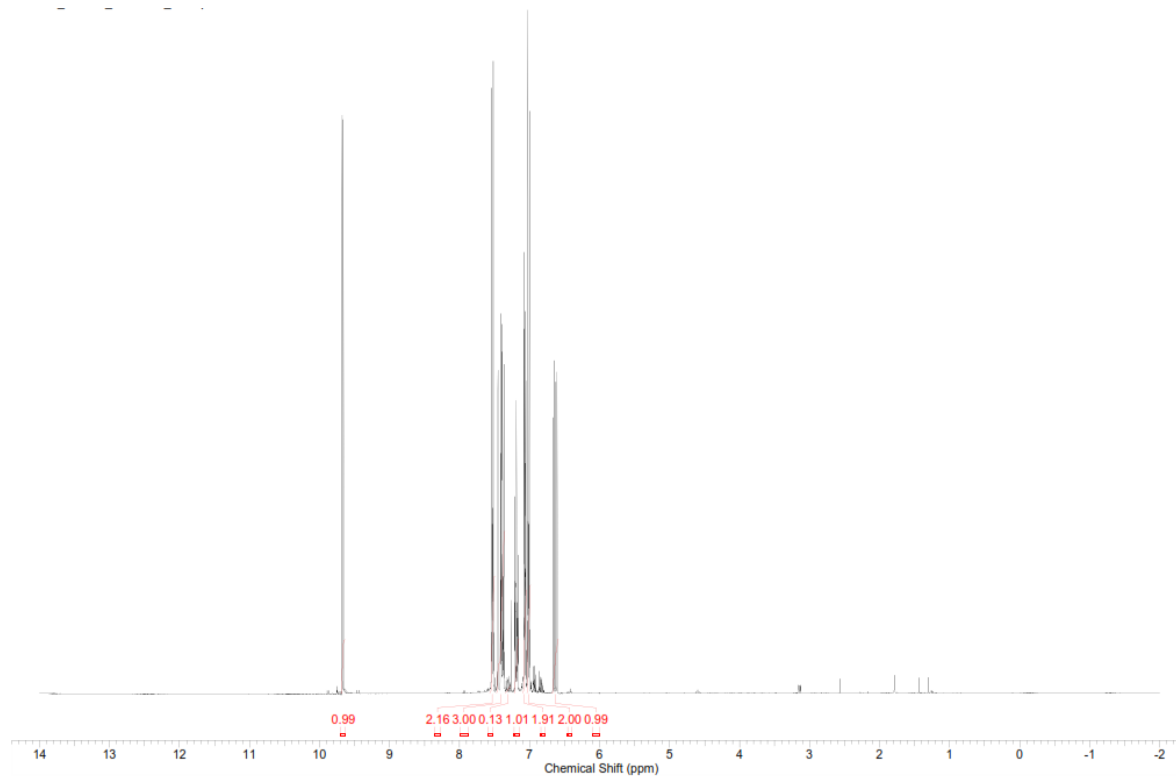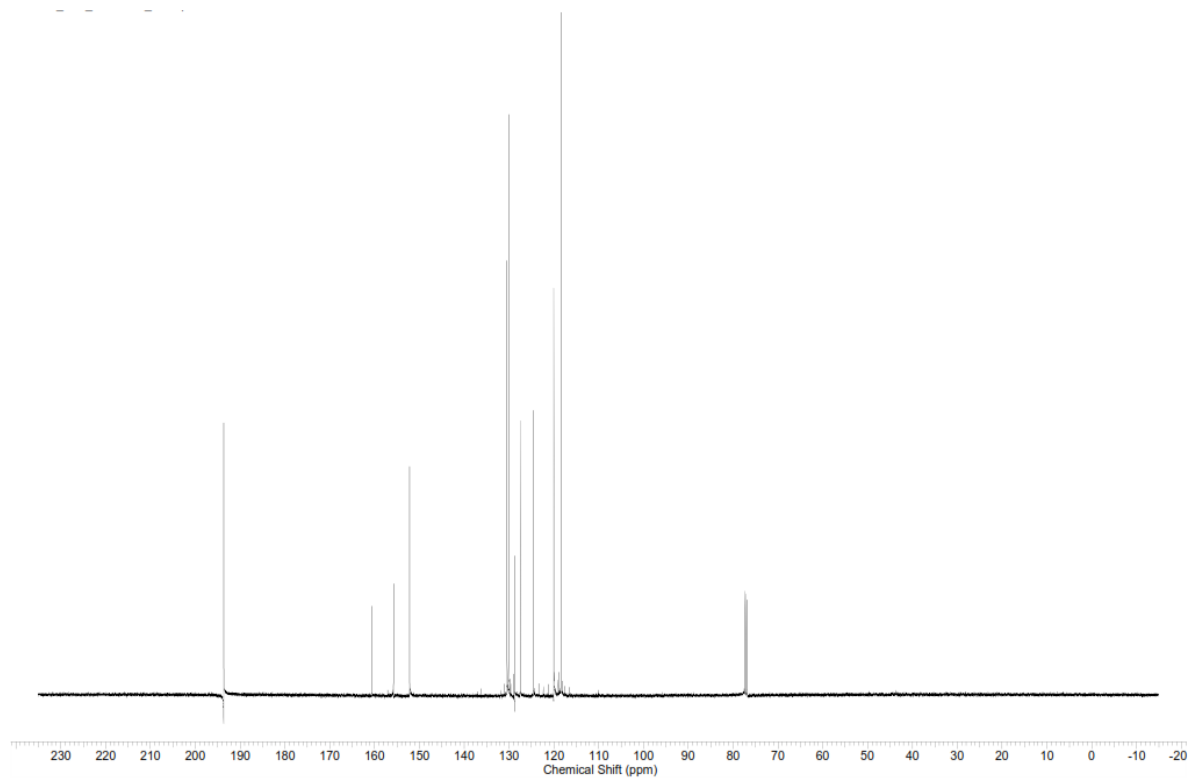

# GC-MS 6g

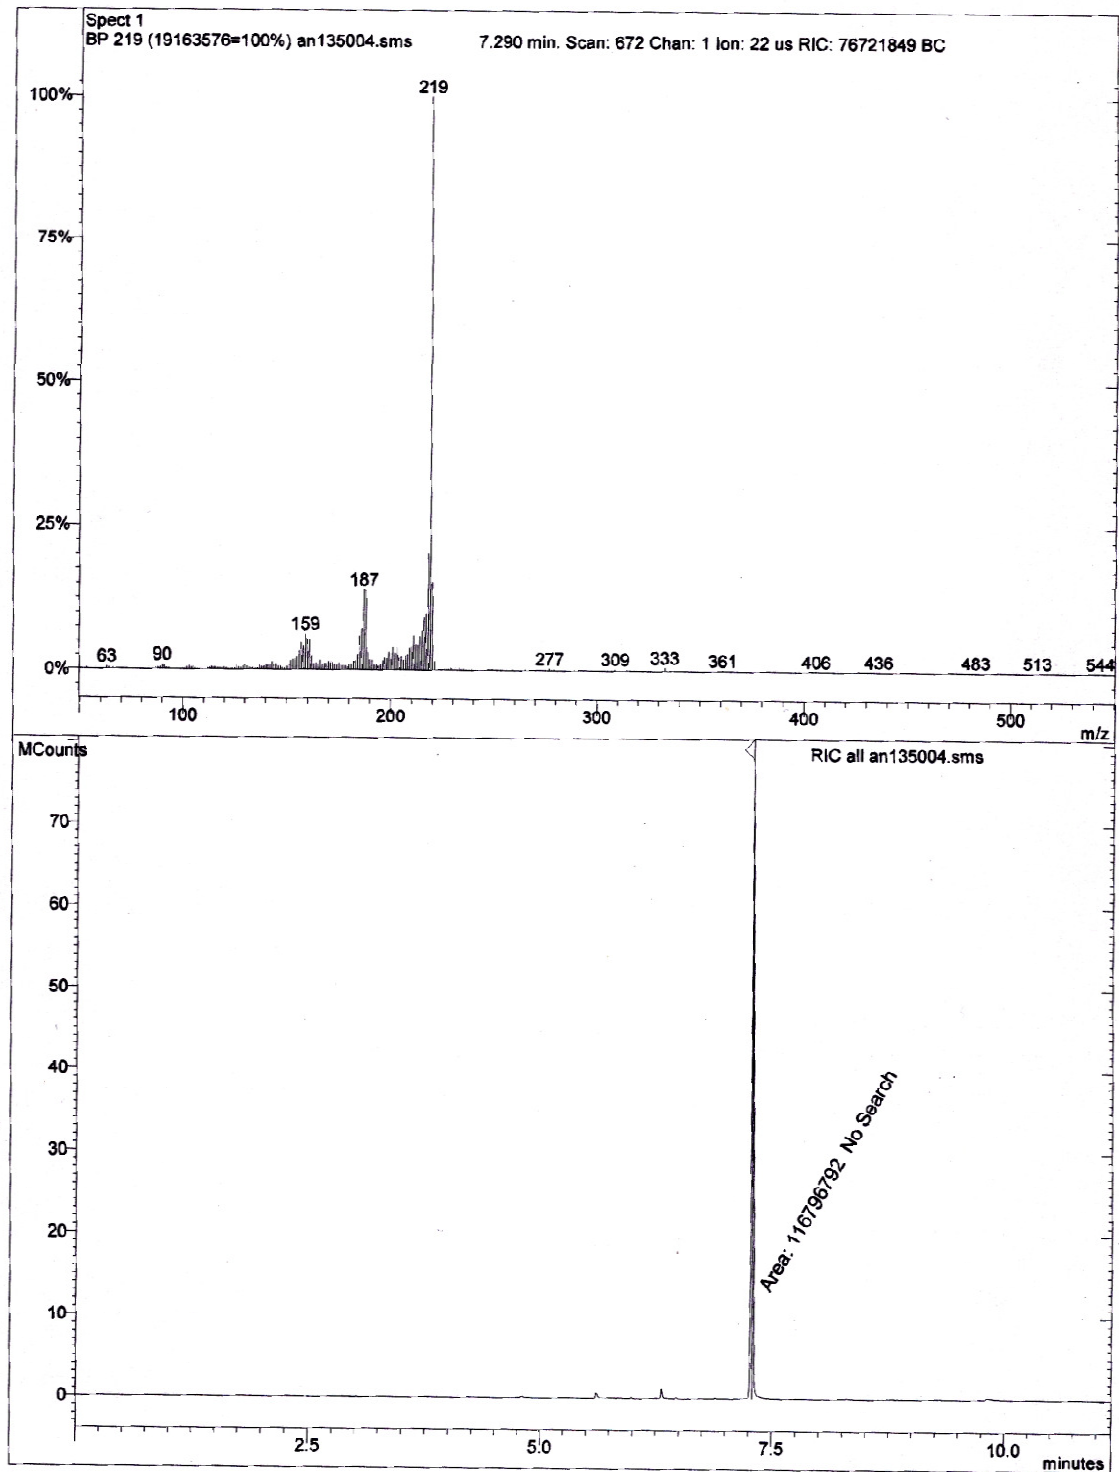

# $^1\text{H}$ NMR and $^{13}\text{C}$ NMR 6g

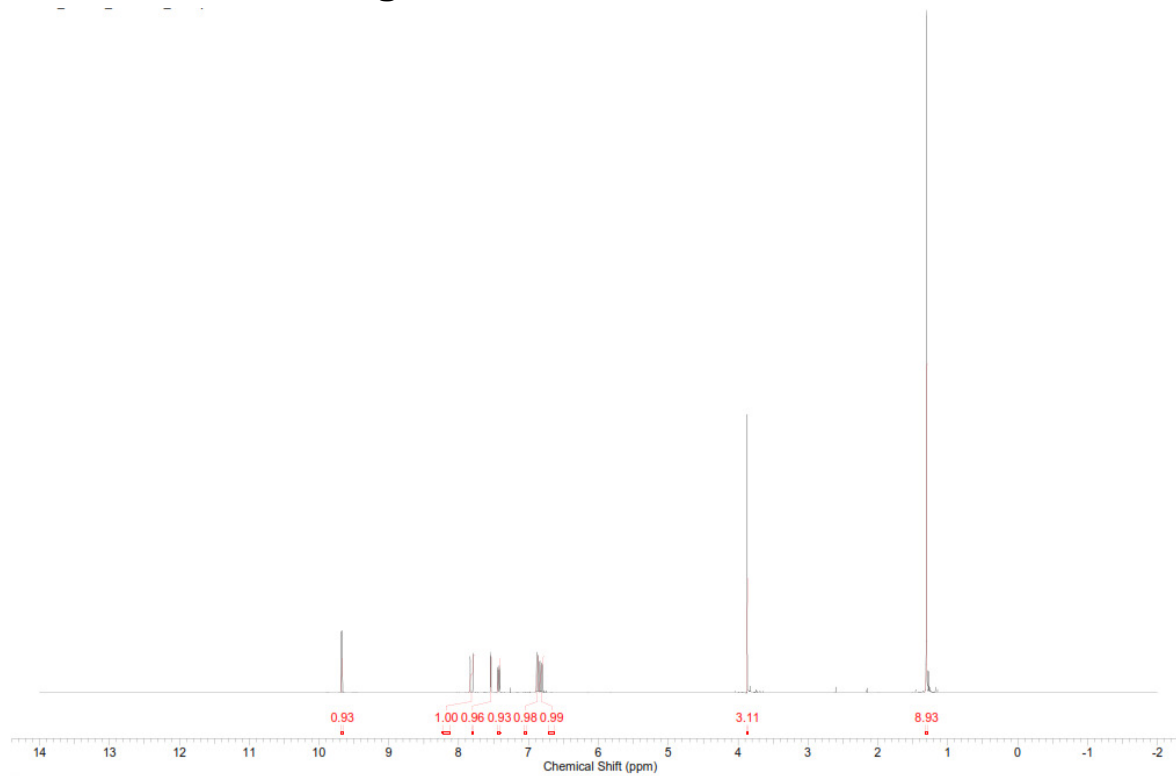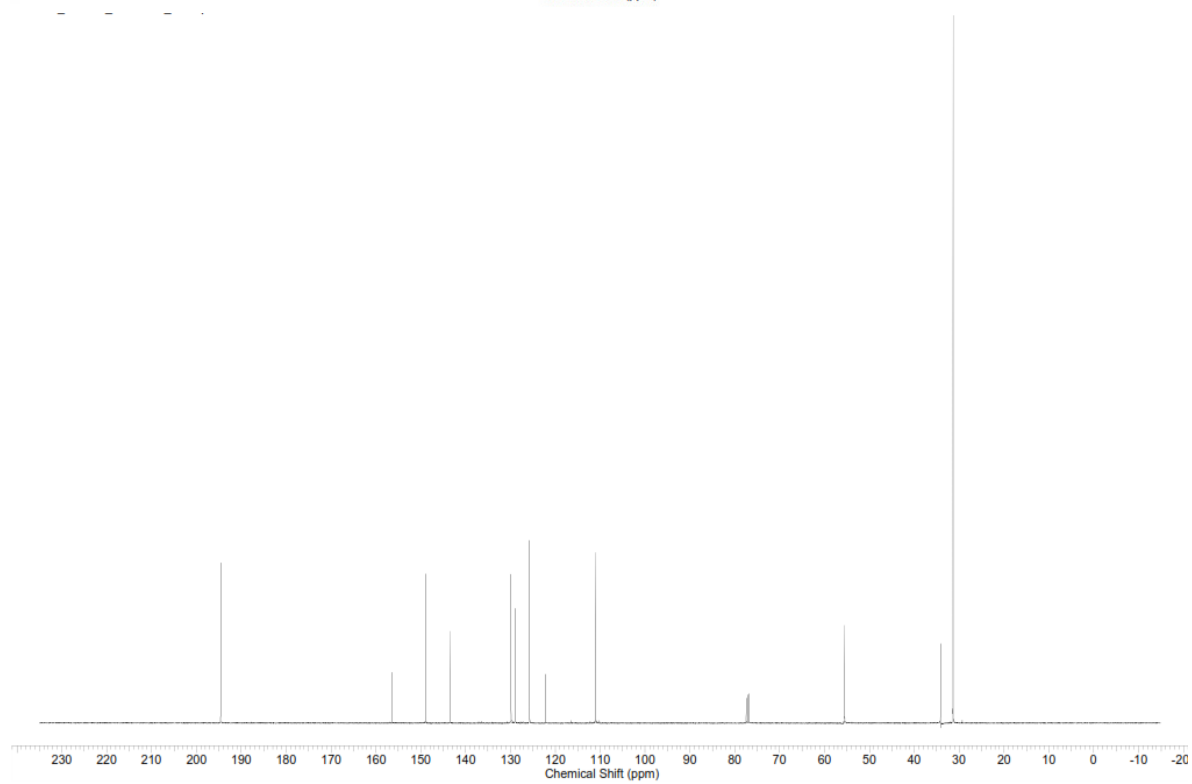



# GC-MS 6h

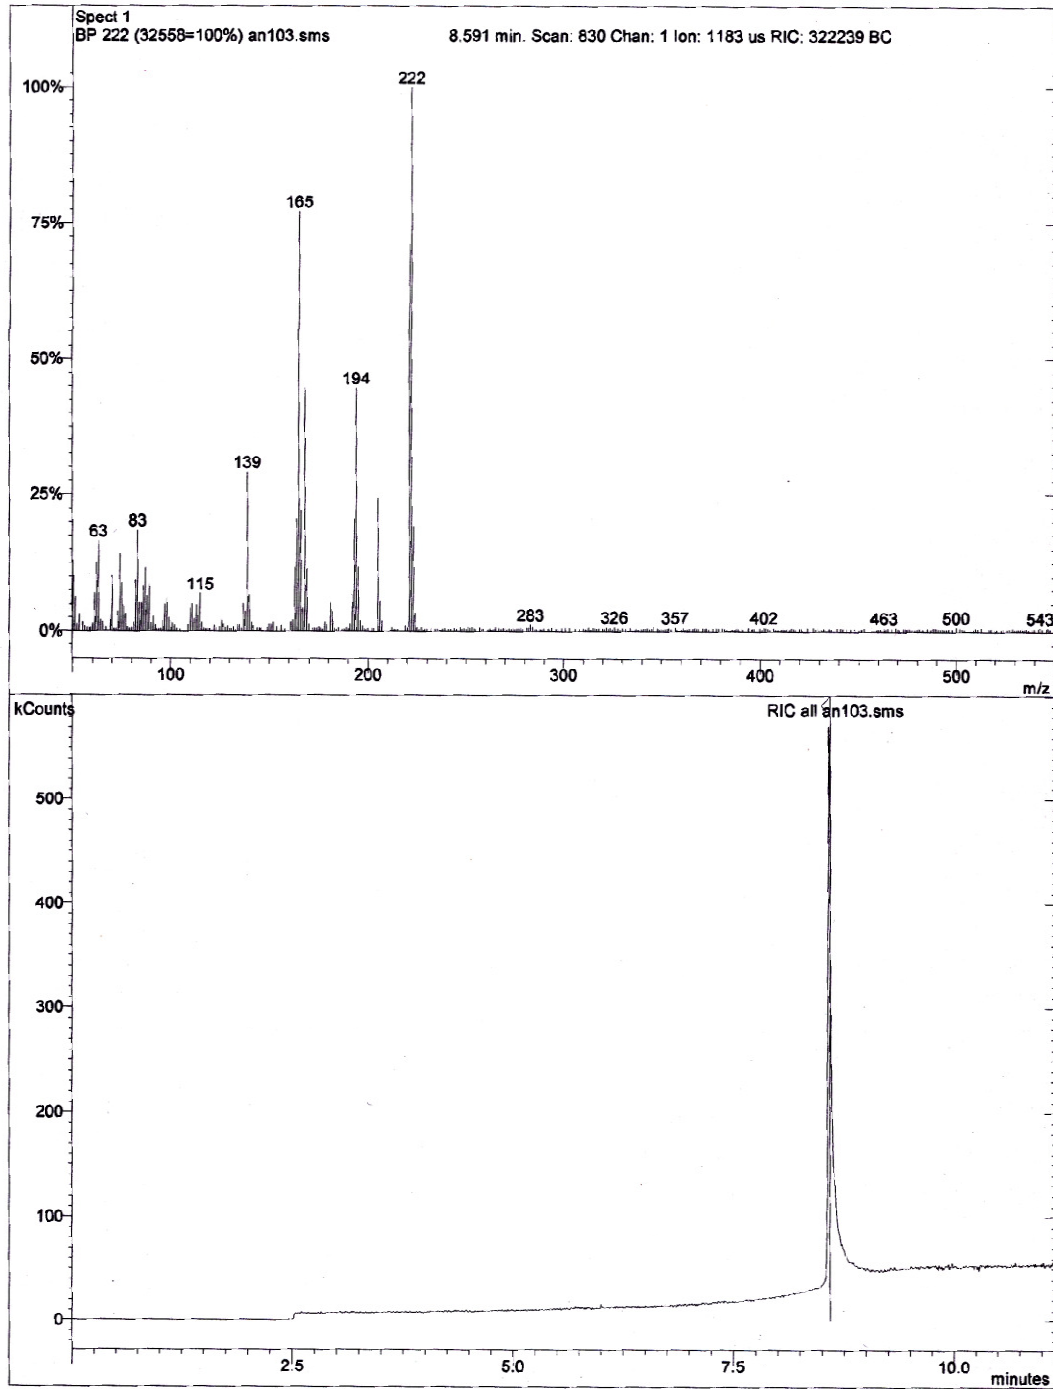

# $^1\text{H}$ NMR and $^{13}\text{C}$ NMR 6h

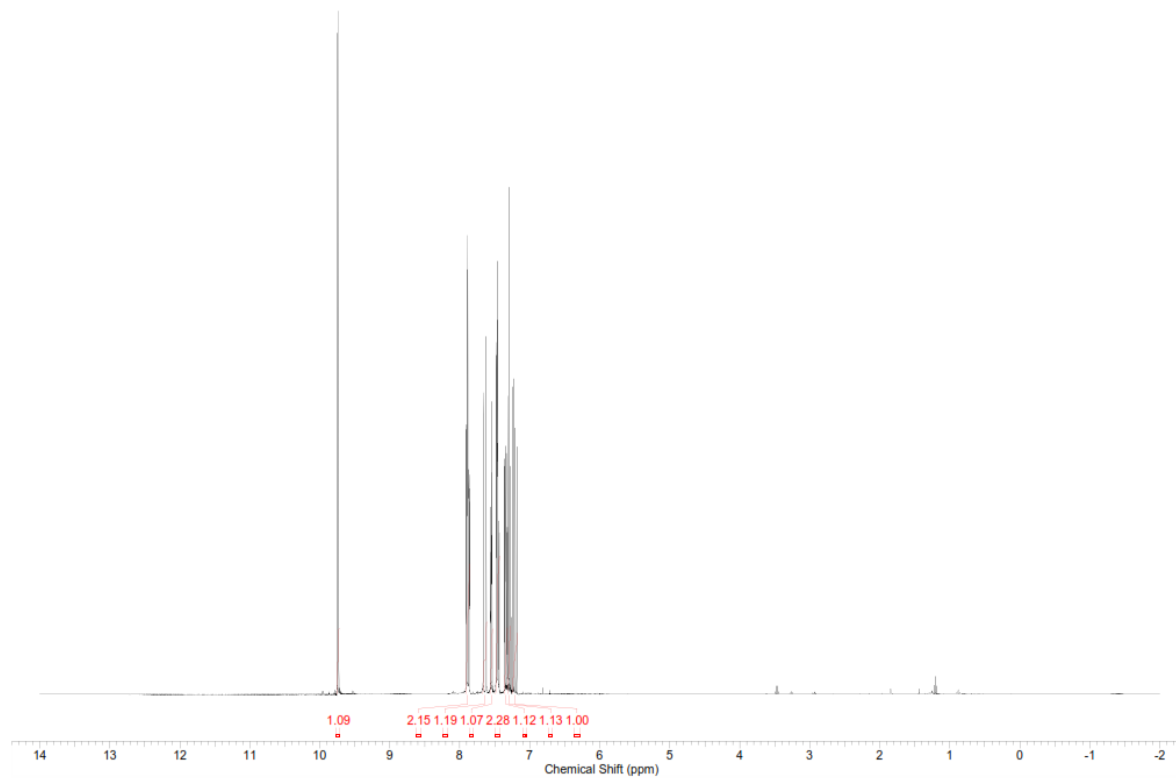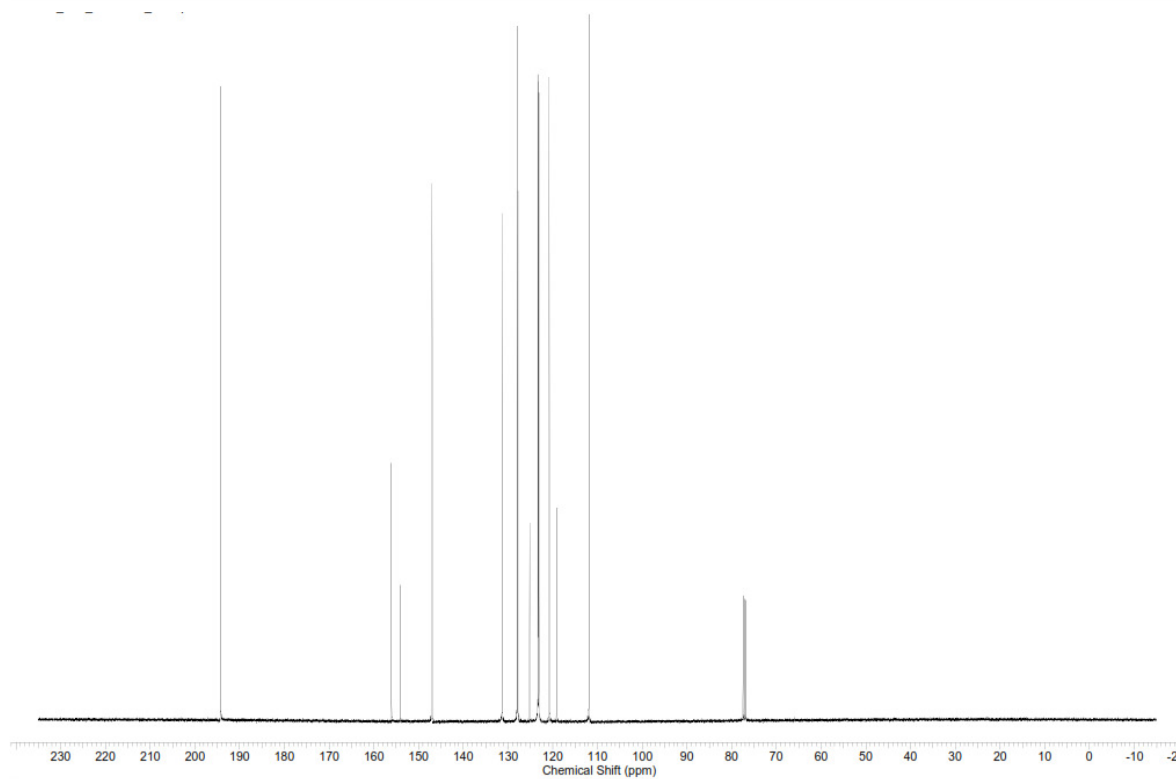

# HMBC and HSQC 6h

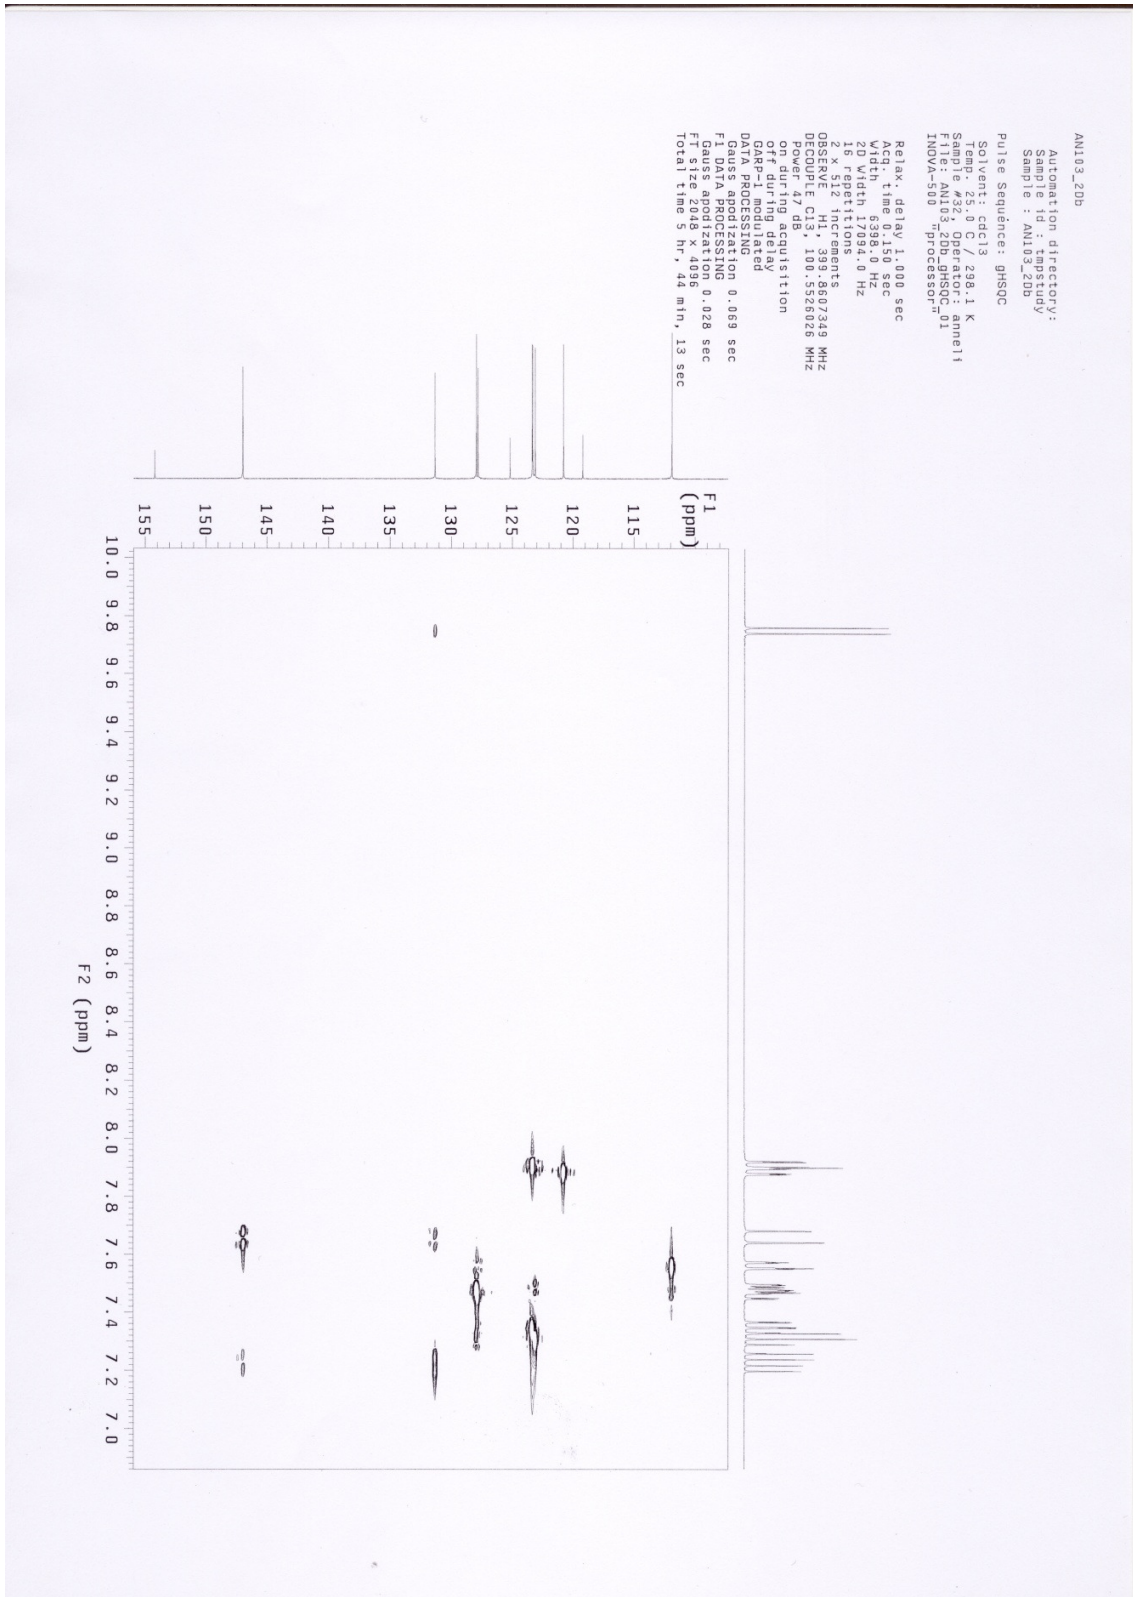

AN103\_2DB

Automation directory:  
Sample id : tmpstudy  
Sample : AN103\_2DB

Pulse Sequence: ghsqc

Solvent: cdc13  
Sample #32 Operator: ampet1  
File: AN103\_2DB\_ghsqc\_01  
INNOVA-500 "processor"

Relax. delay 1.000 sec  
Acq. time 0.150 sec  
Width 6398.0 Hz  
ZD Width 17094.0 Hz  
ZD Spectroscopy  
ZD Spectroscopy  
OBSERVE H1, 399.8607349 MHz  
DECUPLE C13, 100.5526026 MHz  
Power 47 dB  
on during acquisition  
off during delay  
DATA PROMPTED  
Gauss apodization 0.069 sec  
F1 DATA PROCESSING  
Gauss apodization 0.028 sec  
F1 size 2048 x 4096  
Total time 5 hr, 44 min, 13.3 sec

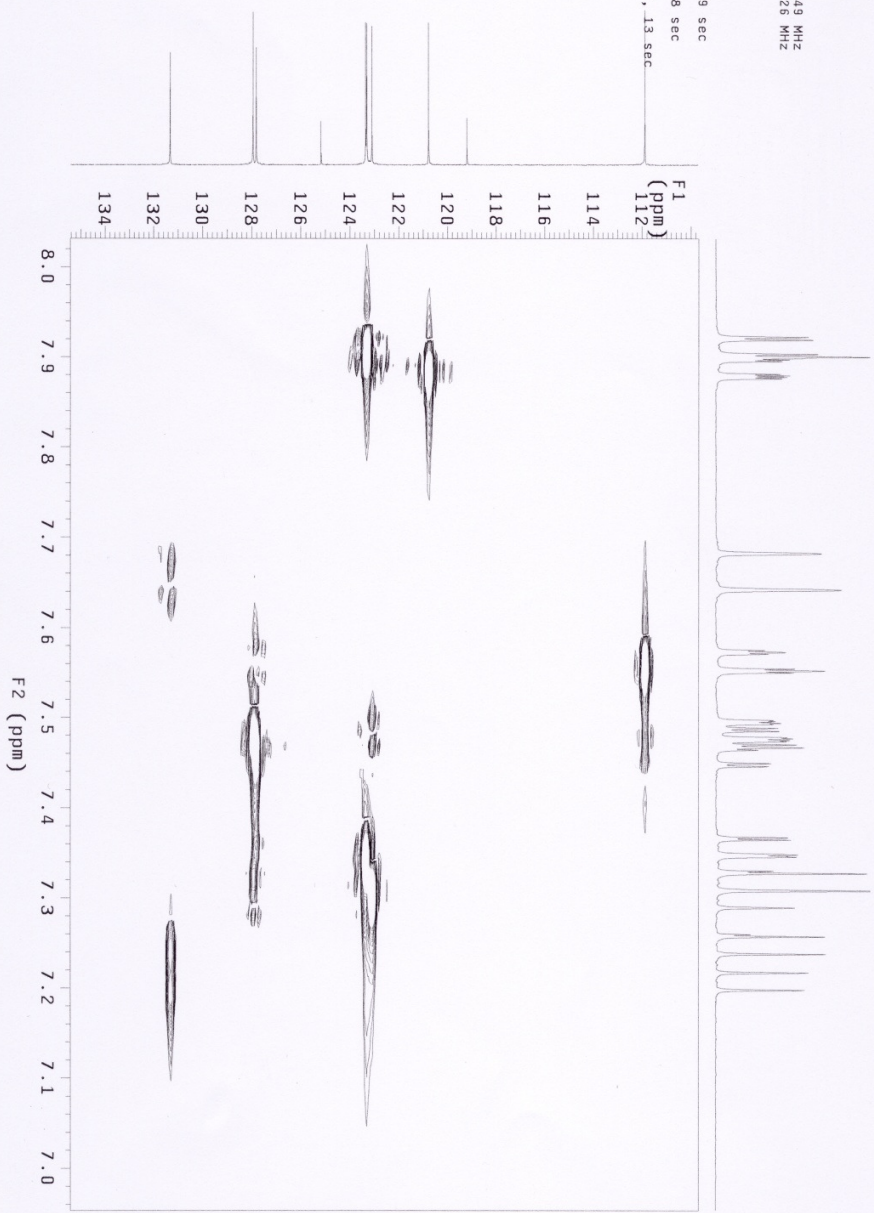

AN103\_2DB  
 Automation directory:  
 Sample id : tempstudy  
 Sample : AN103\_2DB  
 Pulse Sequence: ghmwbc  
 Solvent: cdcl3  
 Temp: 25.0 C / 298.1 K  
 Sample #32, Operator: annel1  
 File: AN103\_2DB\_ghmwb01  
 INOVA-500 "processor"  
 Relax. delay 1.000 sec  
 Acq. time 0.150 sec  
 Width 6398.0 Hz  
 F2 Width 4332.7 Hz  
 F2 Offset 140.0 Hz  
 2 x 512 increments  
 OBSERVE H1, 399.8607349 MHz  
 DATA PROCESSING  
 Sg, sine bell 0.075 sec  
 F1 DATA PROCESSING 0.020 sec  
 F2 gauss approximation 0.020 sec  
 F2 phase adjustment 0.020 sec  
 Total time 0 min, 9 sec

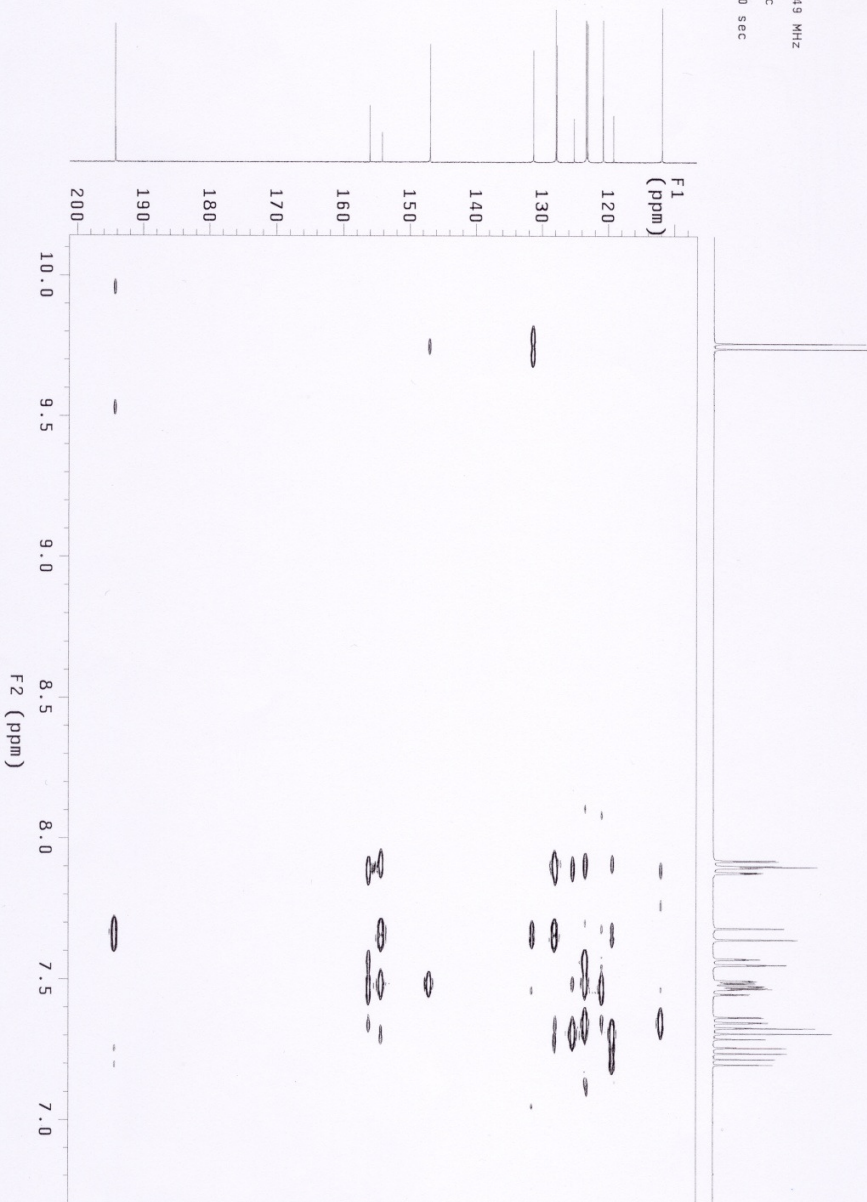

AN103\_2DB  
 Automation directory:  
 Sample ID: AN103\_2DB  
 Sample : AN103\_2DB  
 Pulse Sequence: ghm3c  
 Solvent: cdcl3  
 Temp: 25.0 C / 298.1 K  
 Sample #32, Operator: anneti  
 File: AN103\_2DB\_ghm3c\_01  
 INOVA-500 "processor"  
 Relax. delay 1.000 sec  
 Acq. time 0.150 sec  
 F2 (ppm) 6392.7  
 Width 6392.7 Hz  
 16 repetitions  
 2 x 512 increments  
 OBSERVE H1, 399.8607349 MHz  
 DATA PROCESSING  
 SQ, sine bell 0.075 sec  
 F2 DATA PROCESSING 0.020 sec  
 F1 DATA PROCESSING 0.020 sec  
 FT size 2048 x 4096  
 Total time 5 hr, 53 min, 21 sec

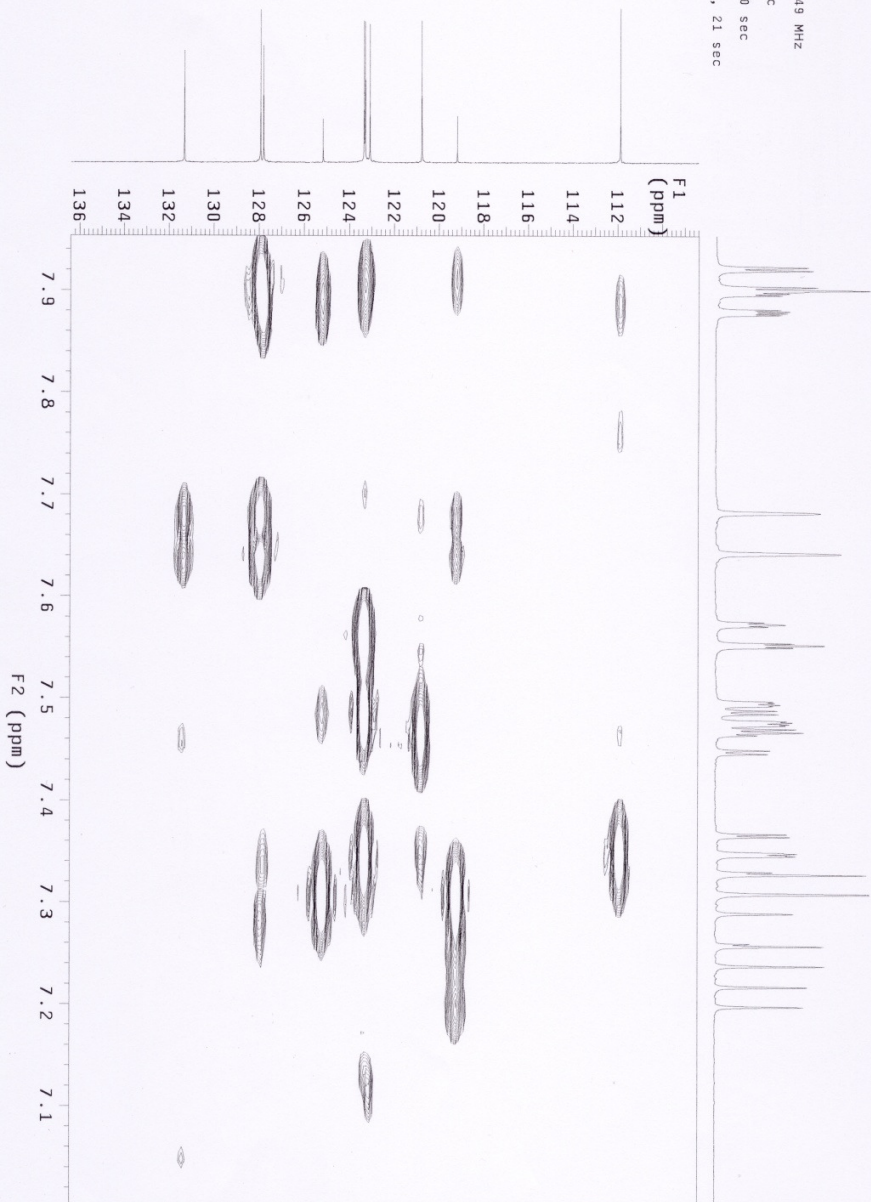

# HPLC-MS 6i

## Compound List

| Cmpd. Label      | Area Frac. % |
|------------------|--------------|
| Cmpd 1, 1.95 min | 98.2         |
| Cmpd 2, 2.24 min | 1.8          |

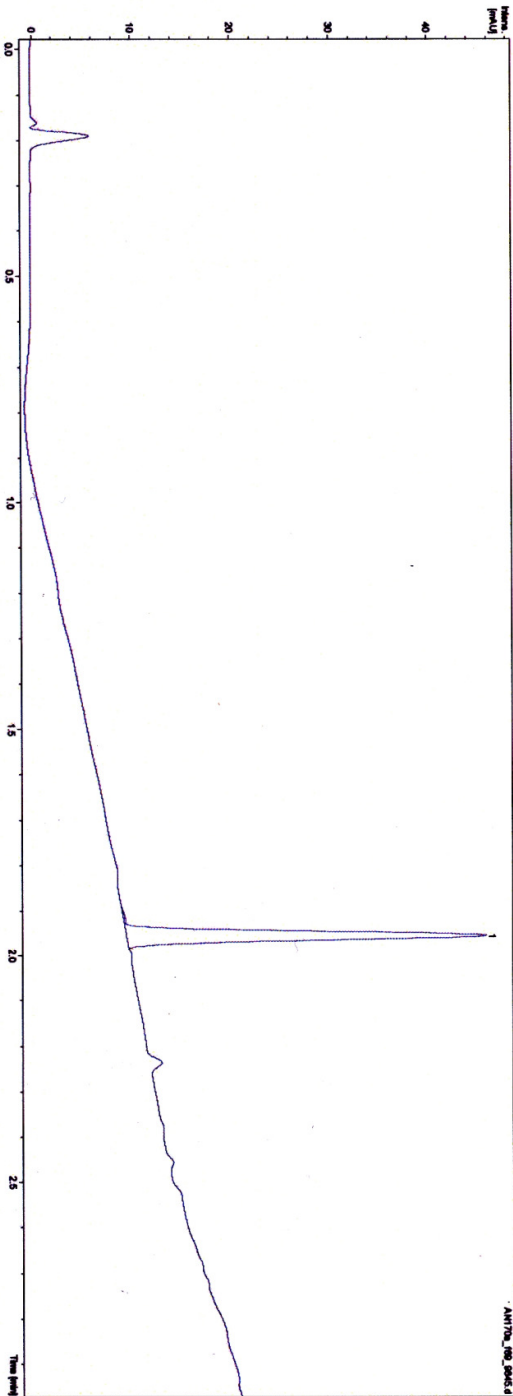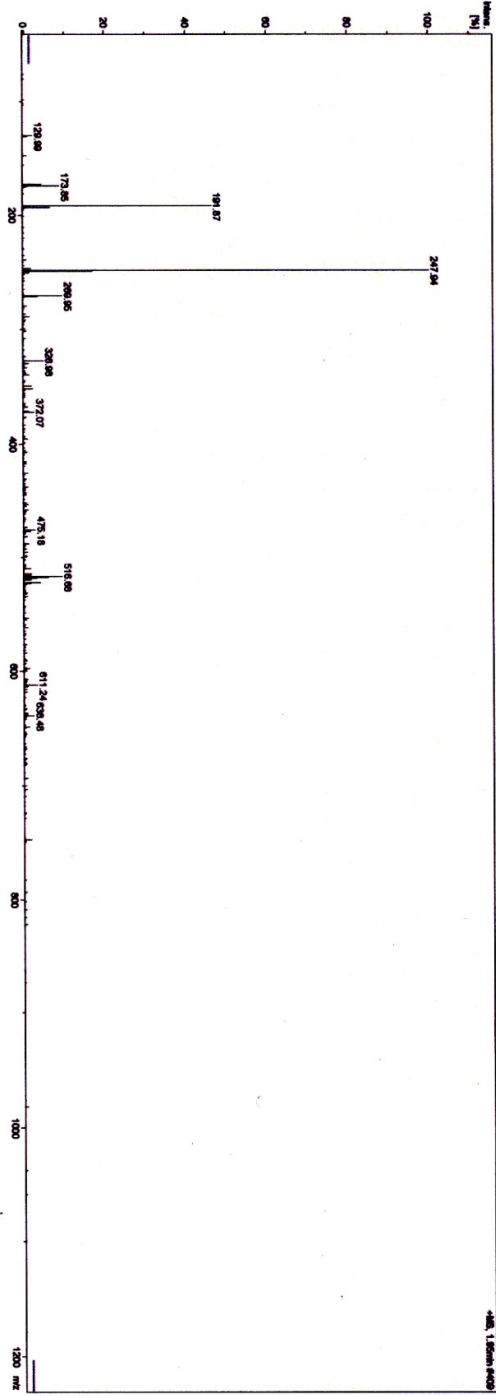

# $^1\text{H}$ NMR and $^{13}\text{C}$ NMR 6i

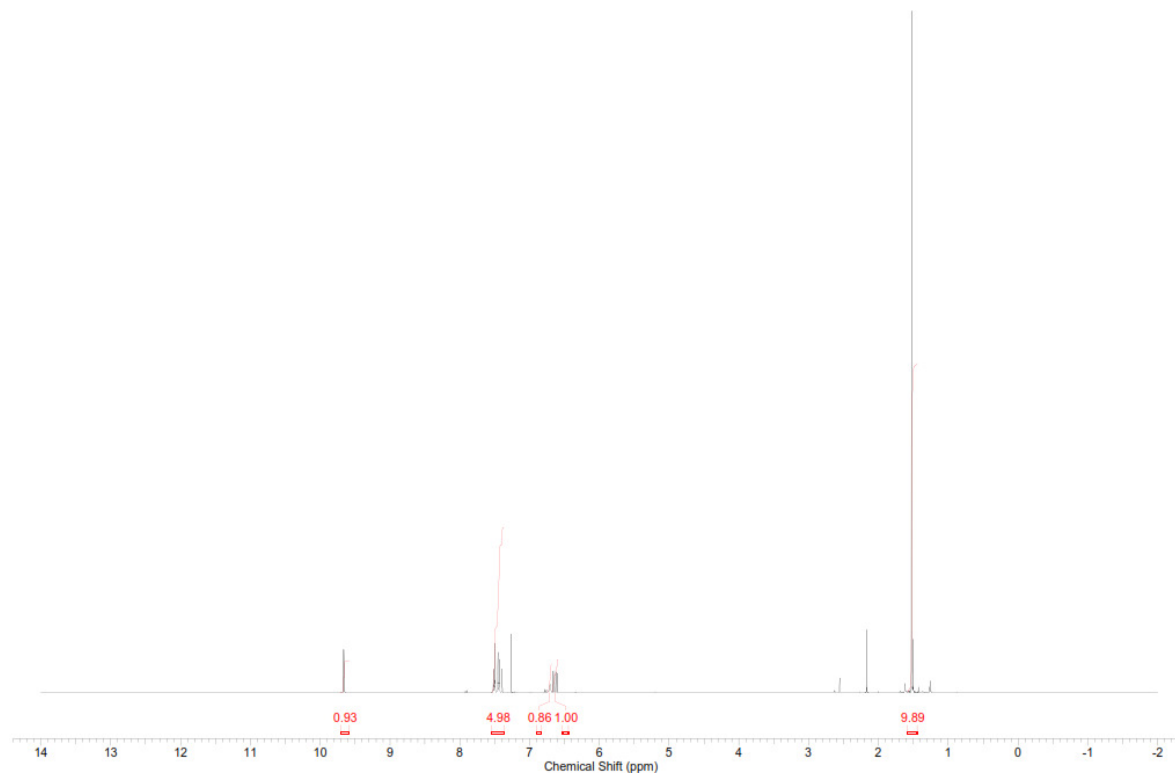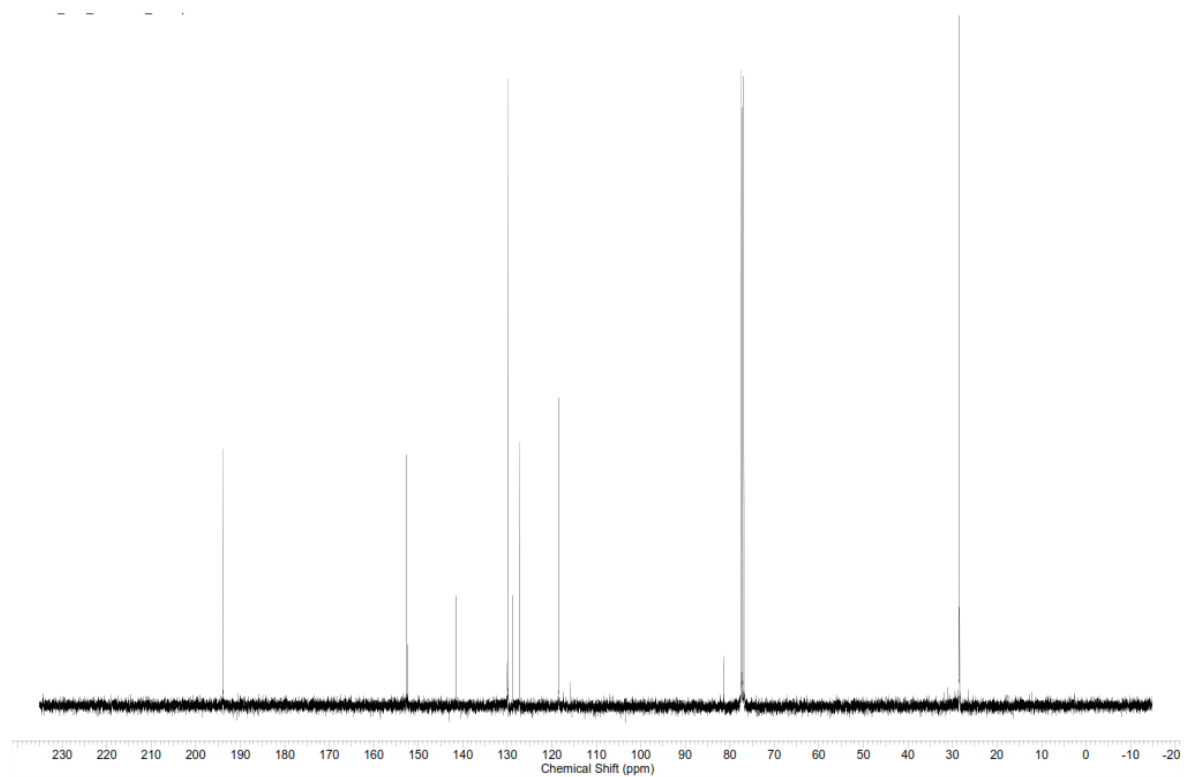



# GC-MS 6j

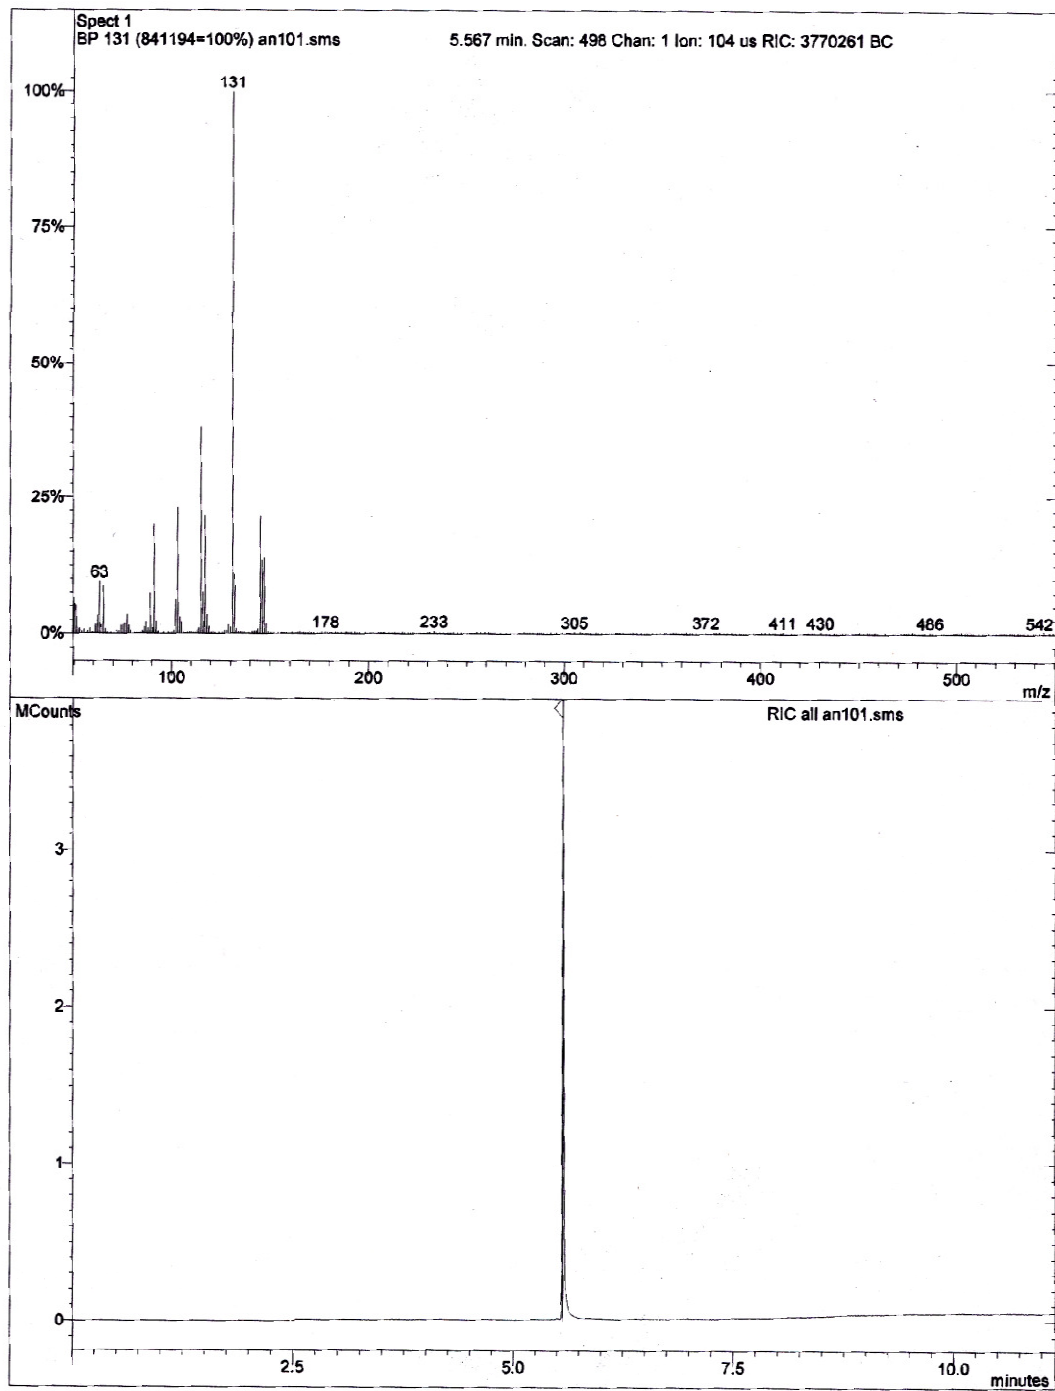

# **<sup>1</sup>H NMR 6j**

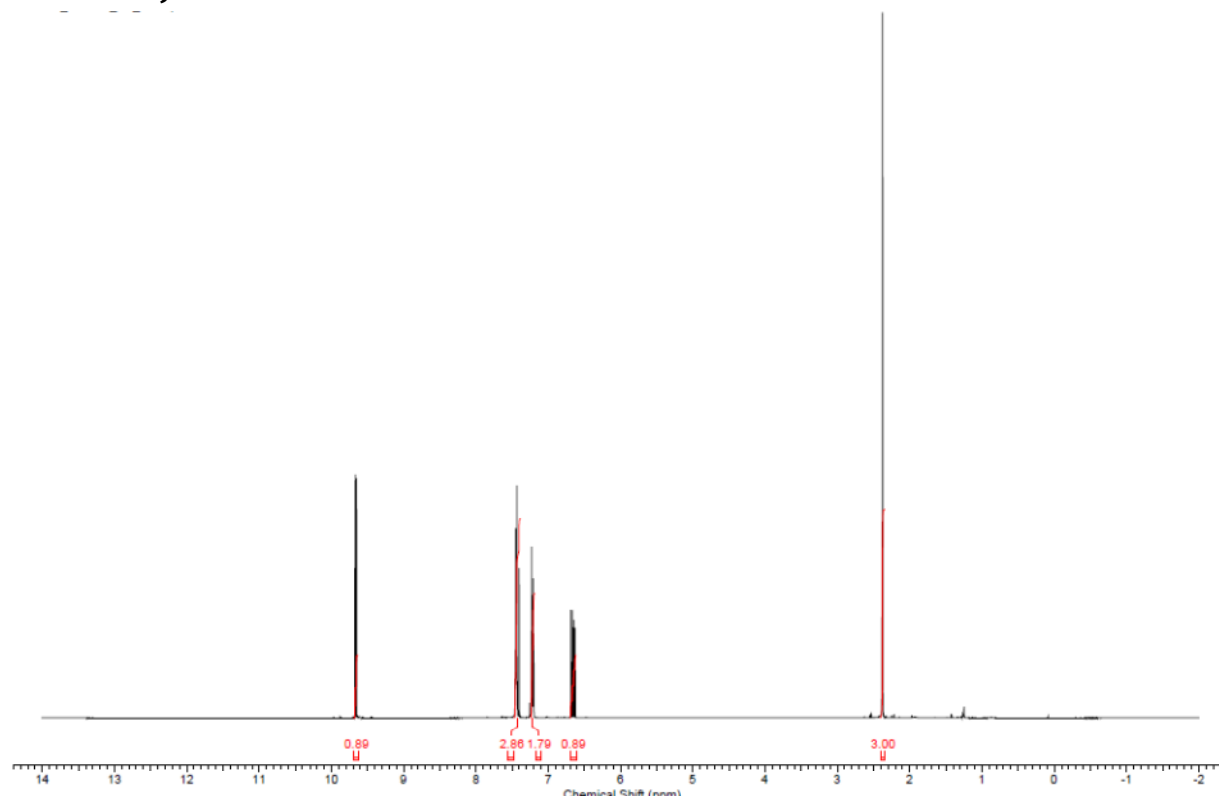

# GC-MS 6k

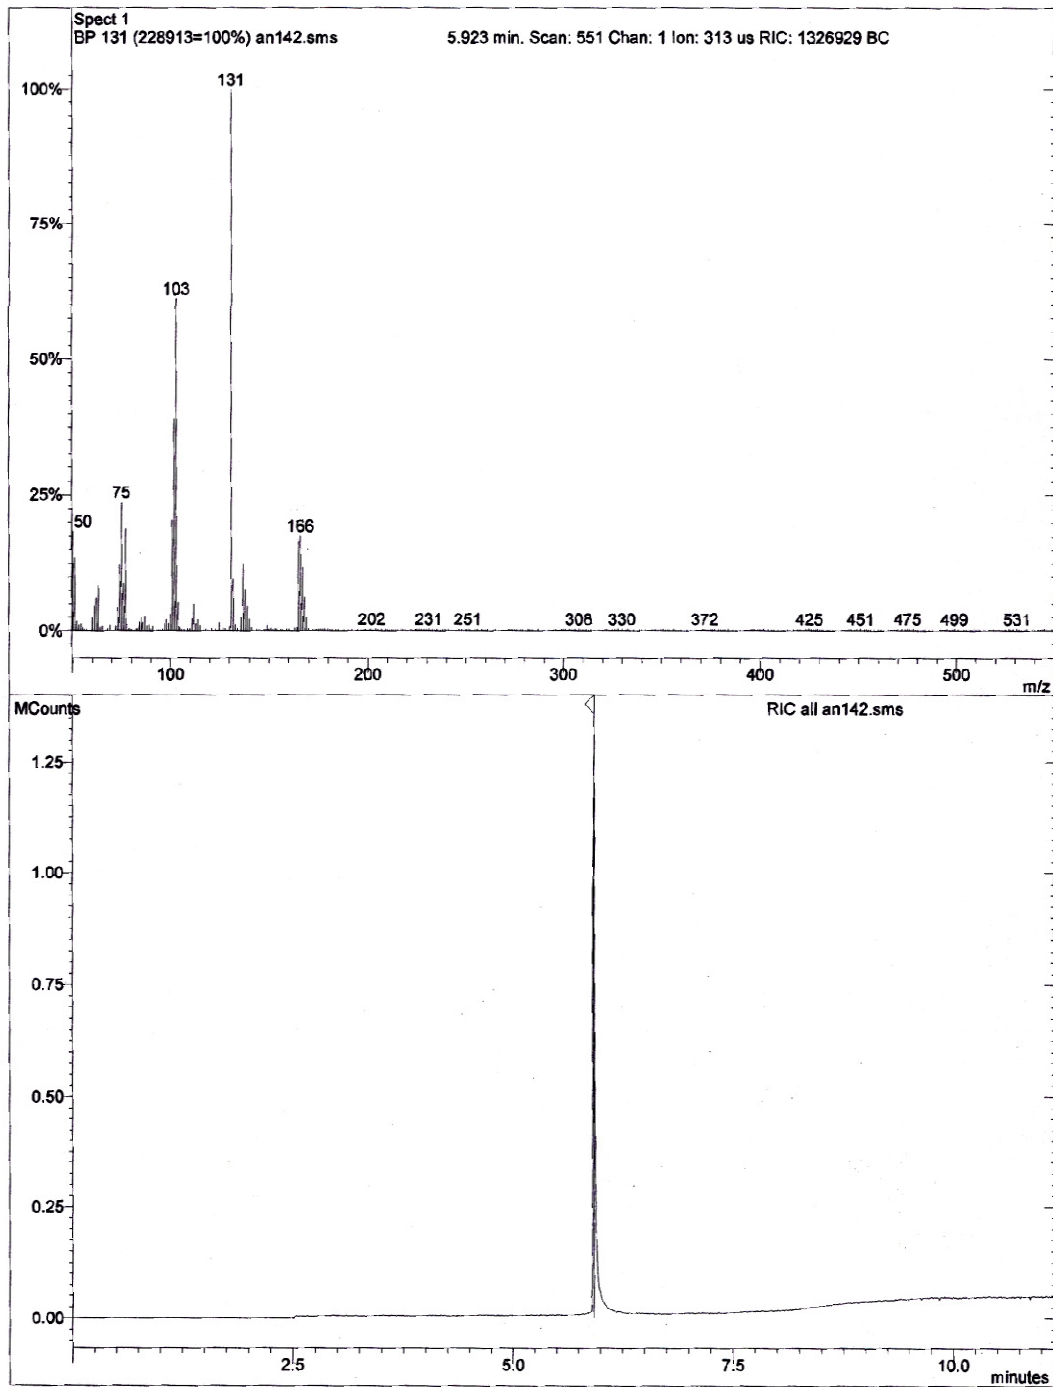

# <sup>1</sup>H NMR 6k

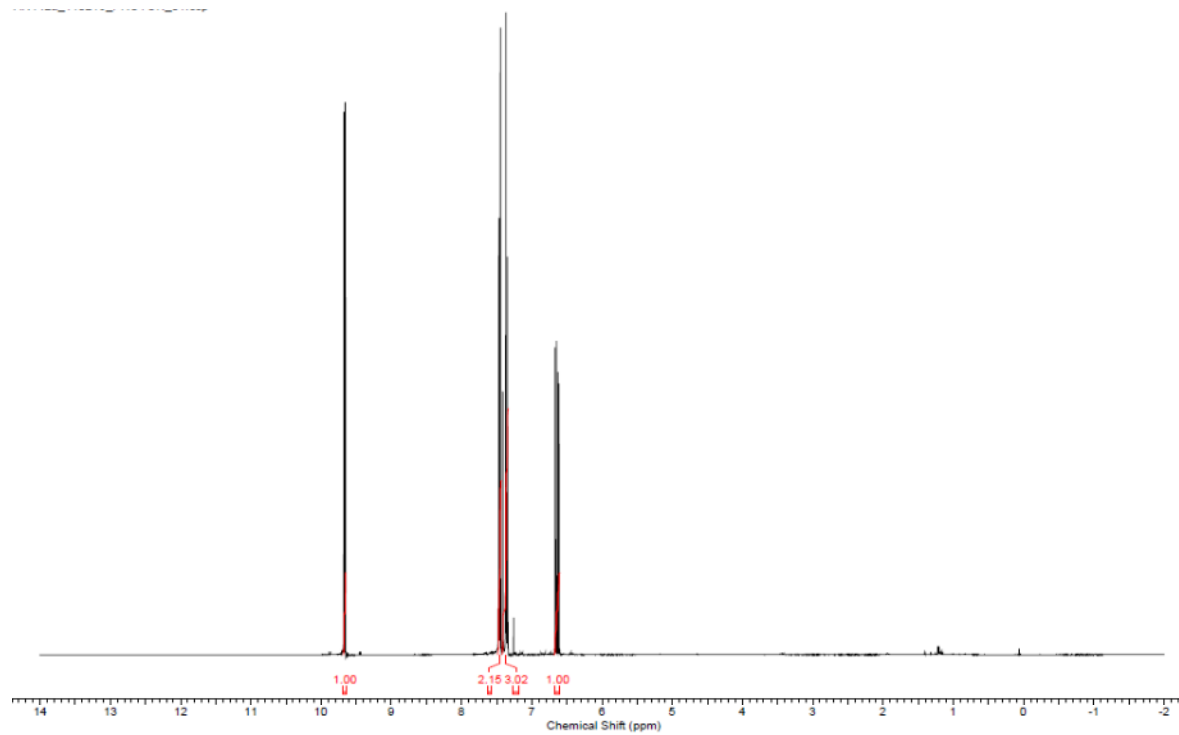

# GC-MS 6I

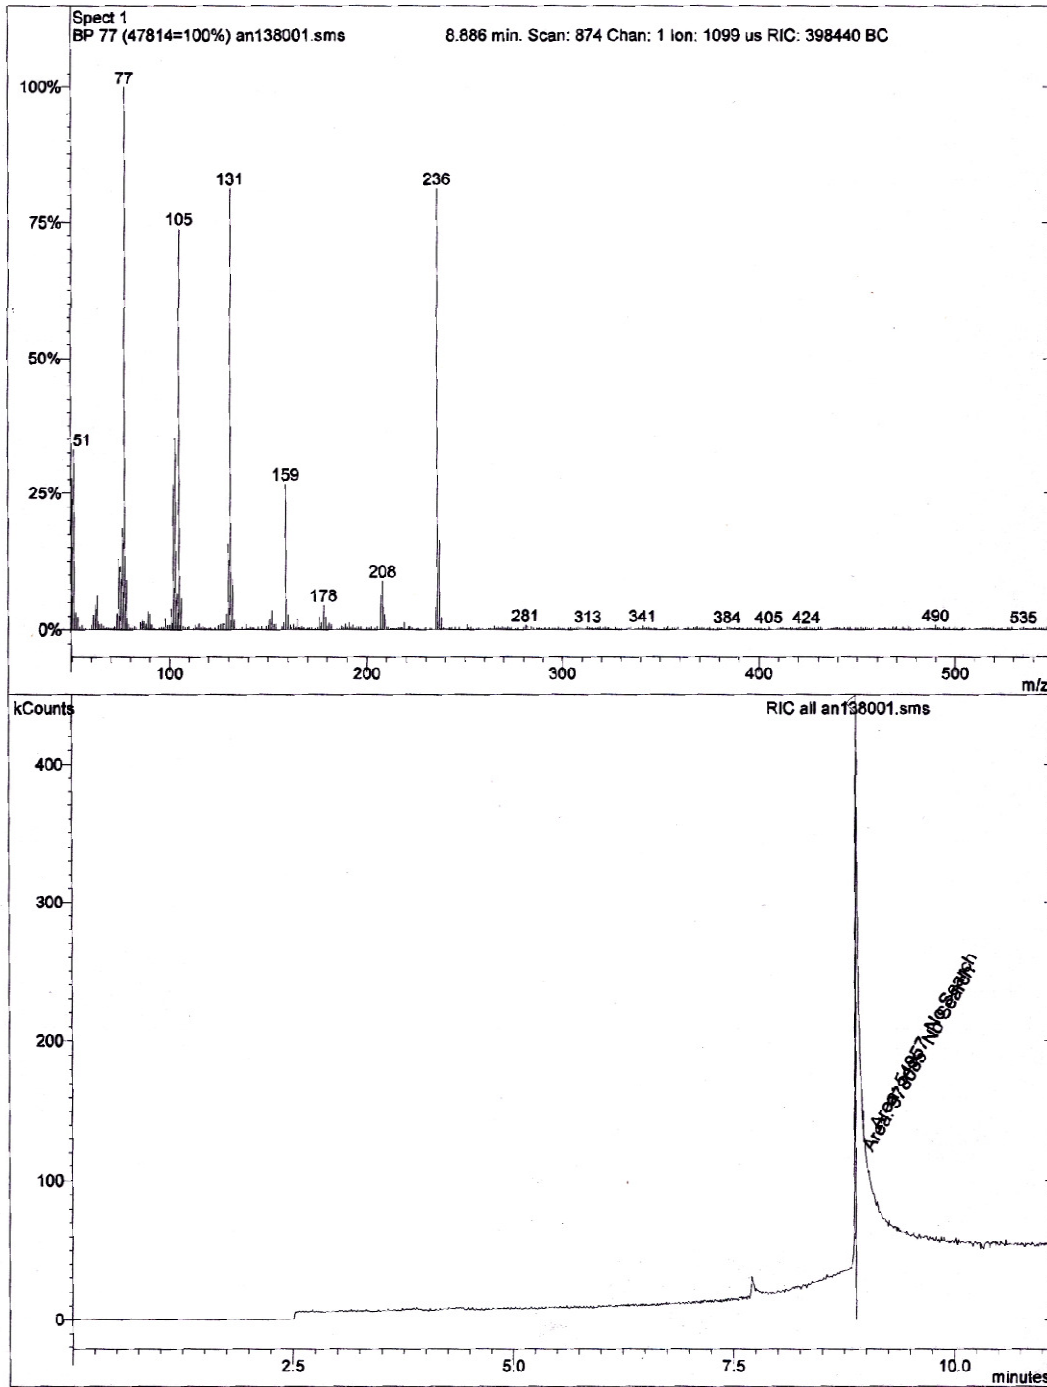

# $^1\text{H}$ NMR and $^{13}\text{C}$ NMR 6I

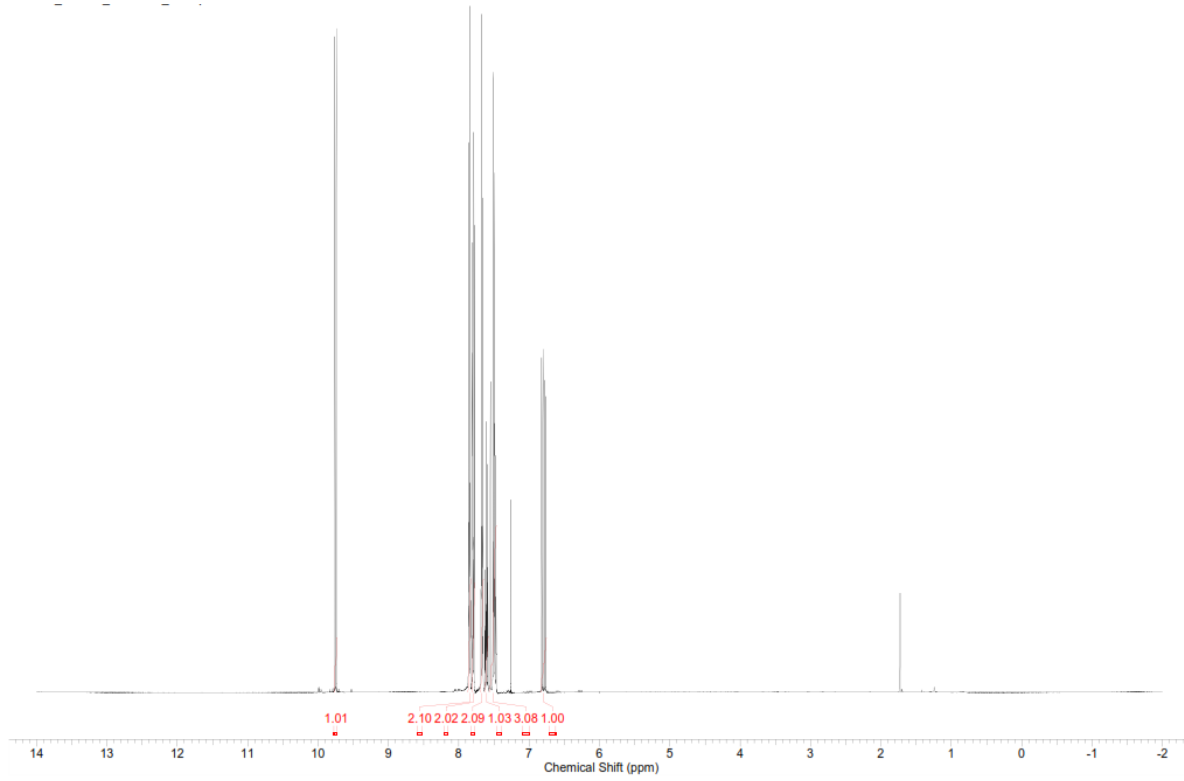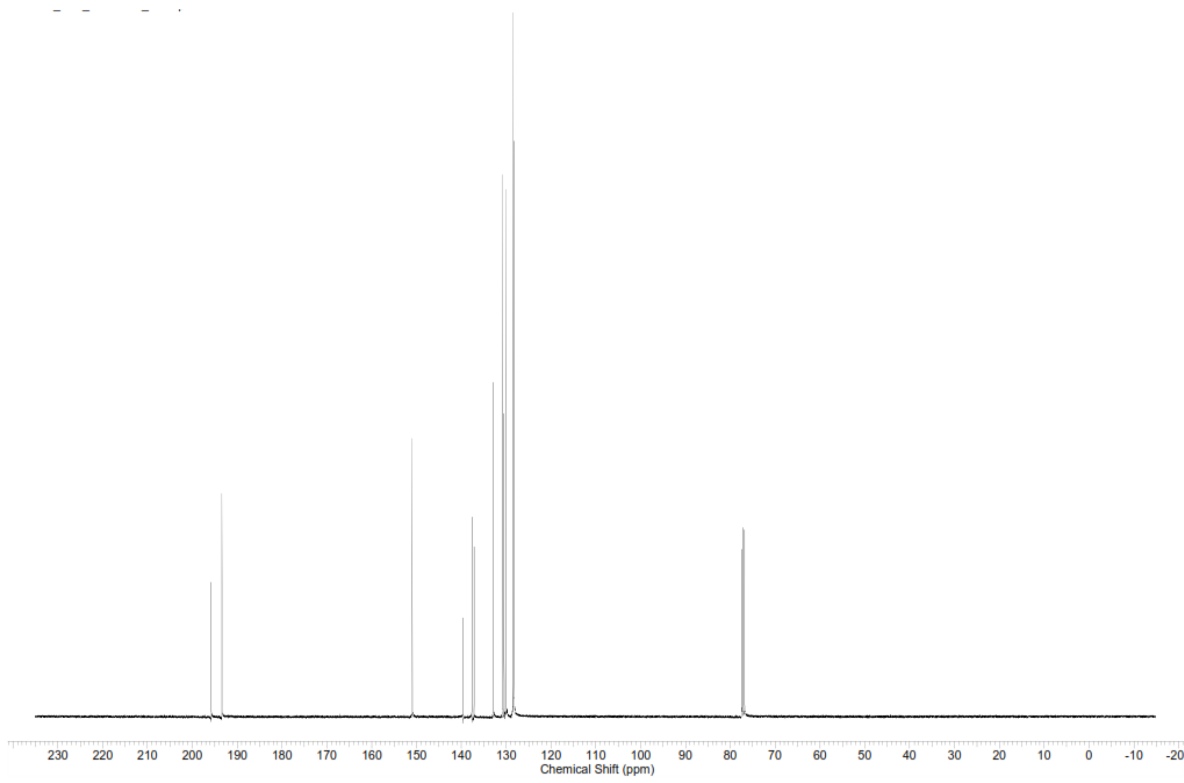

# GC-MS 6m

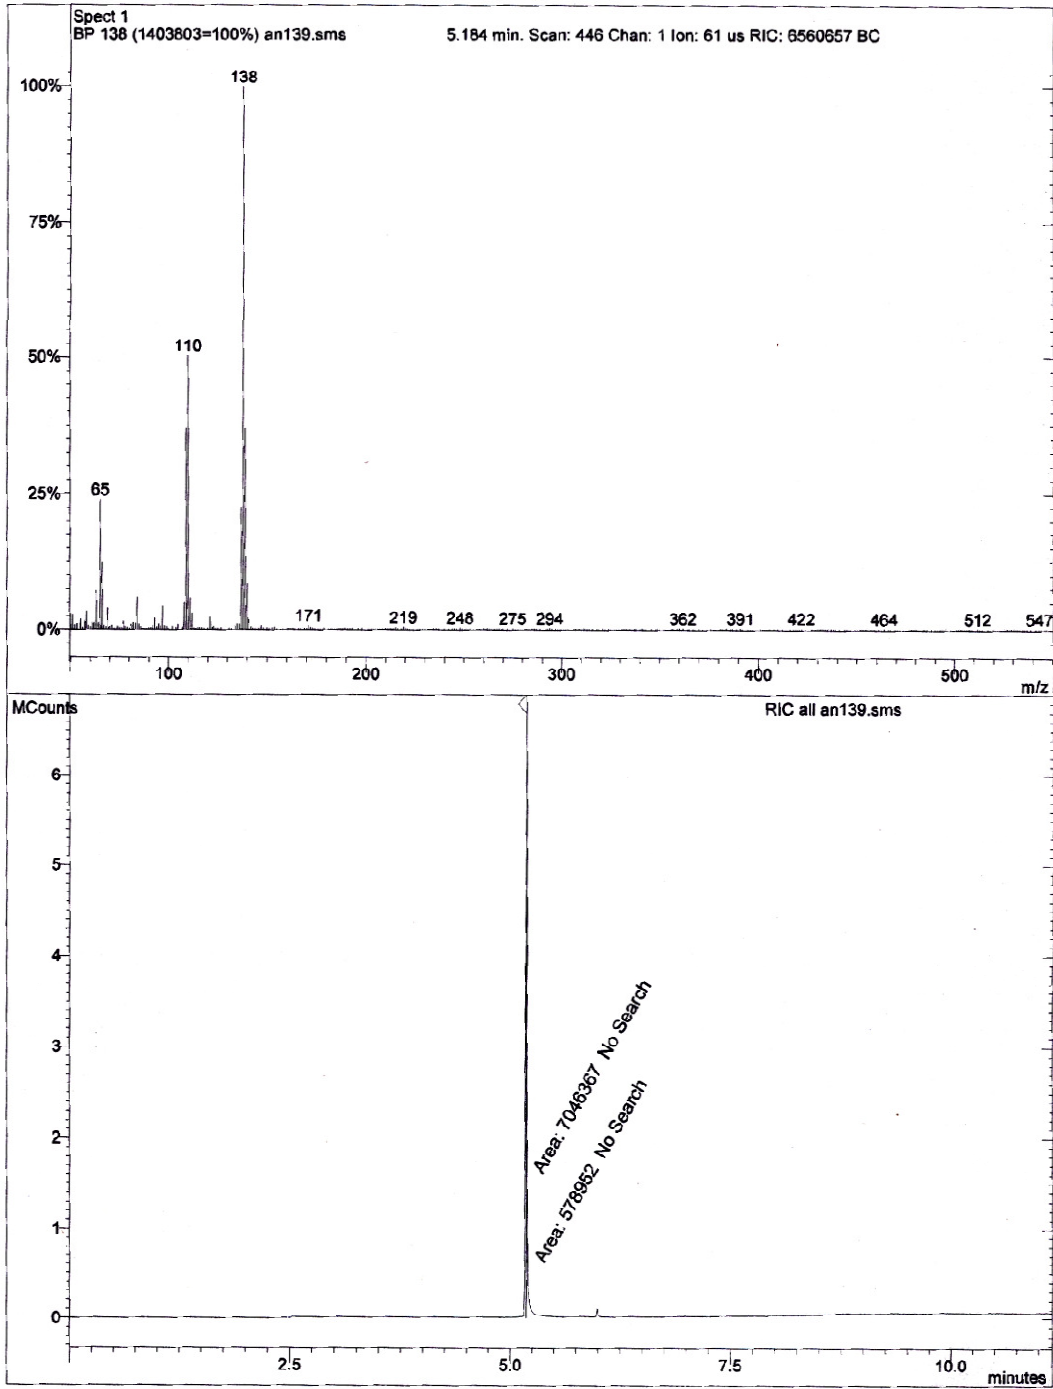

**$^1\text{H}$  NMR 6m**

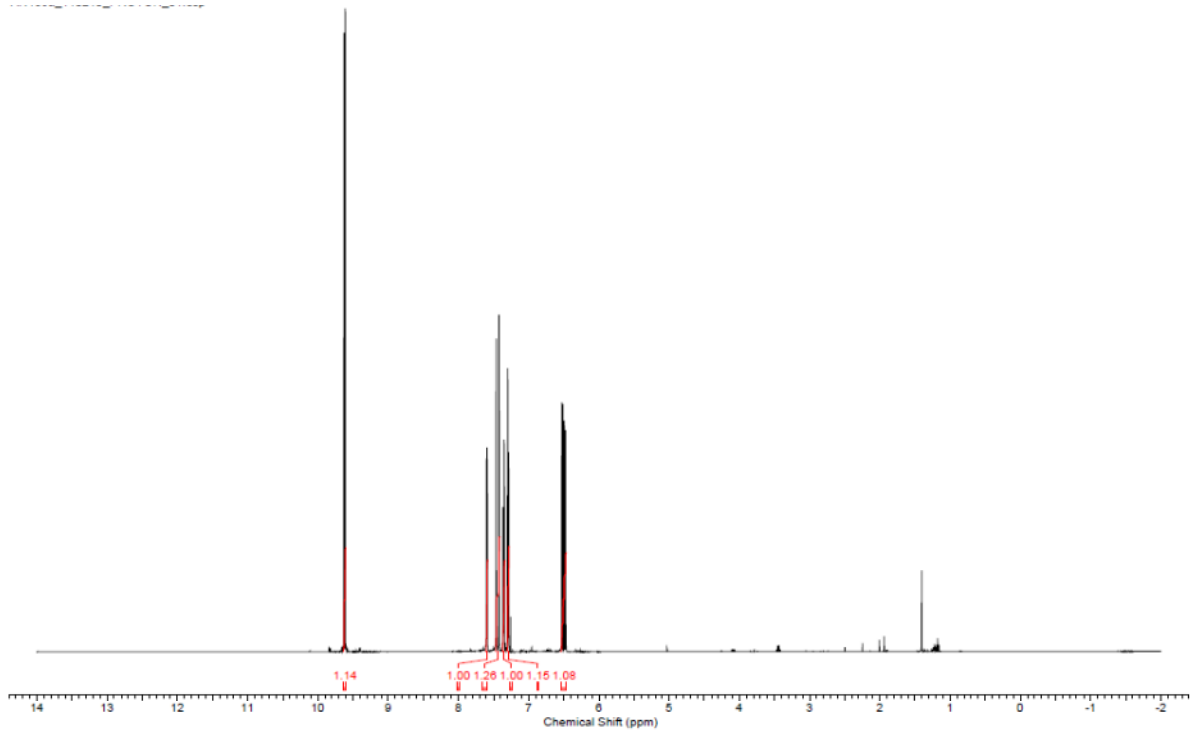



# GC-MS 6n

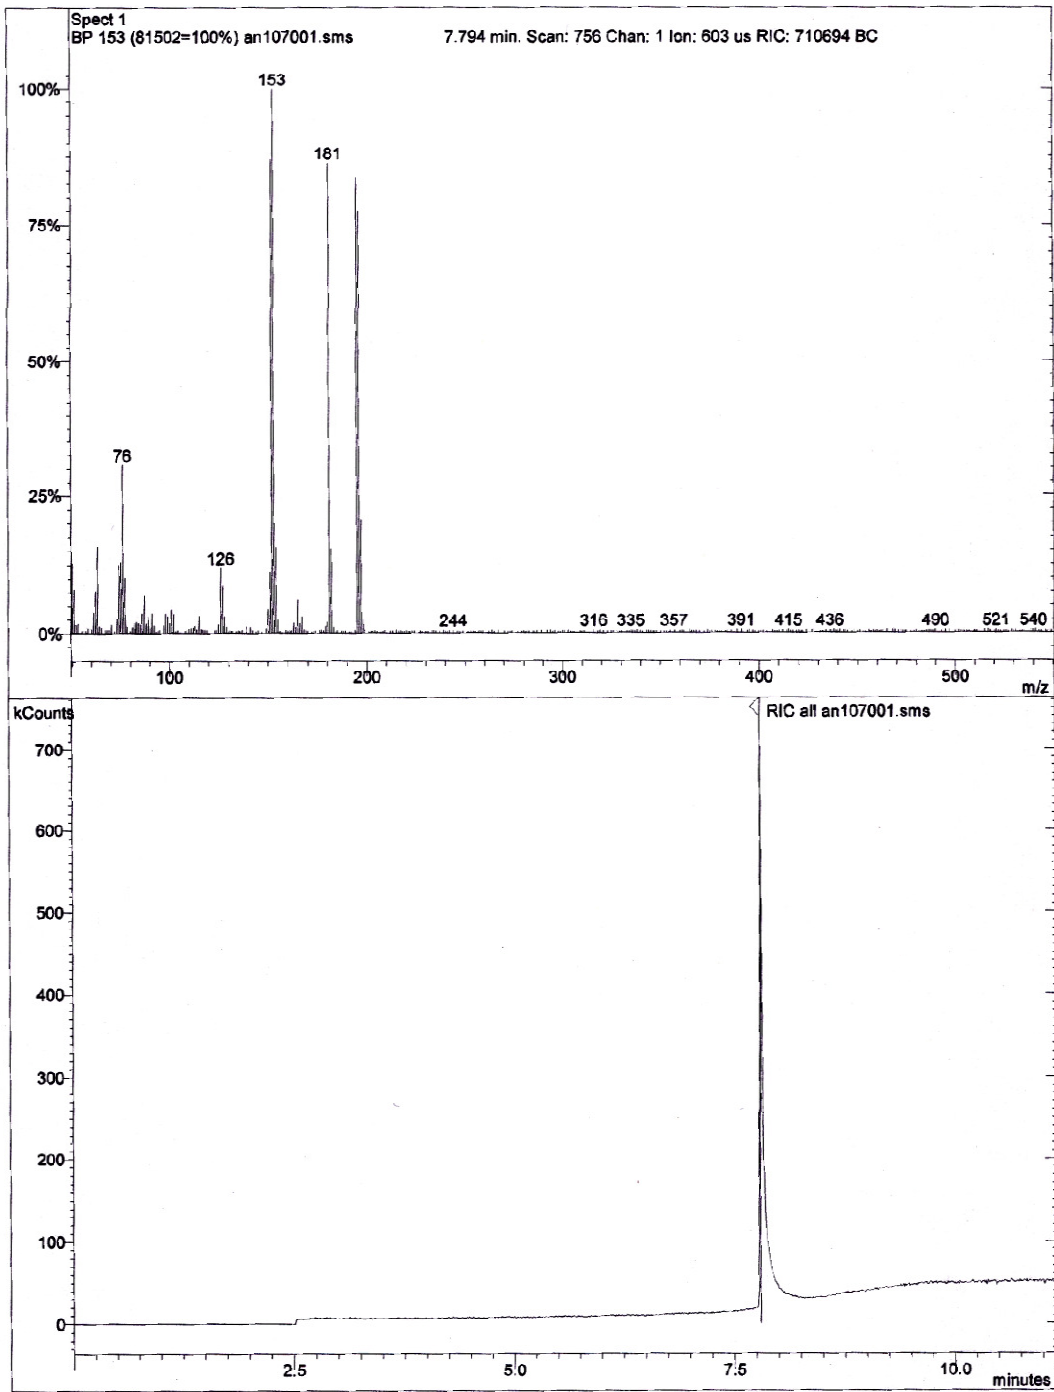

# **<sup>1</sup>H NMR 6n**

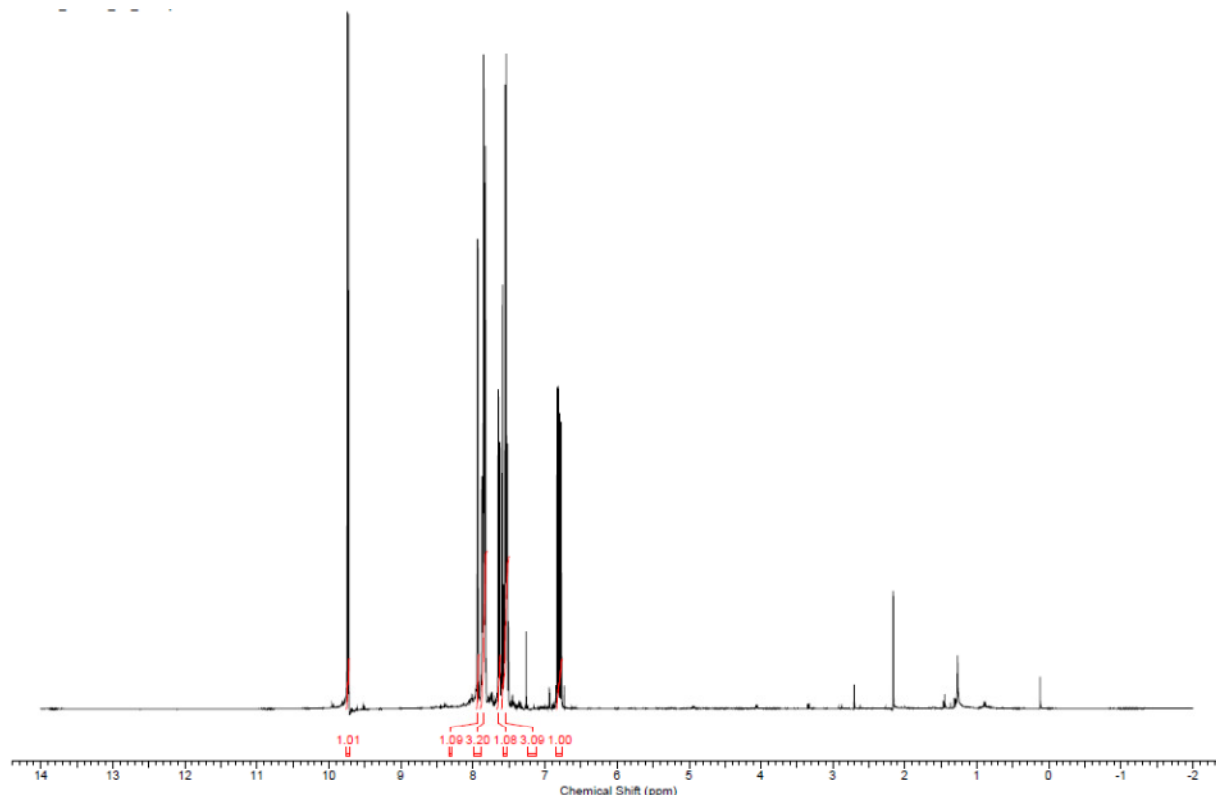

# $^1\text{H}$ NMR and $^{13}\text{C}$ NMR 10a

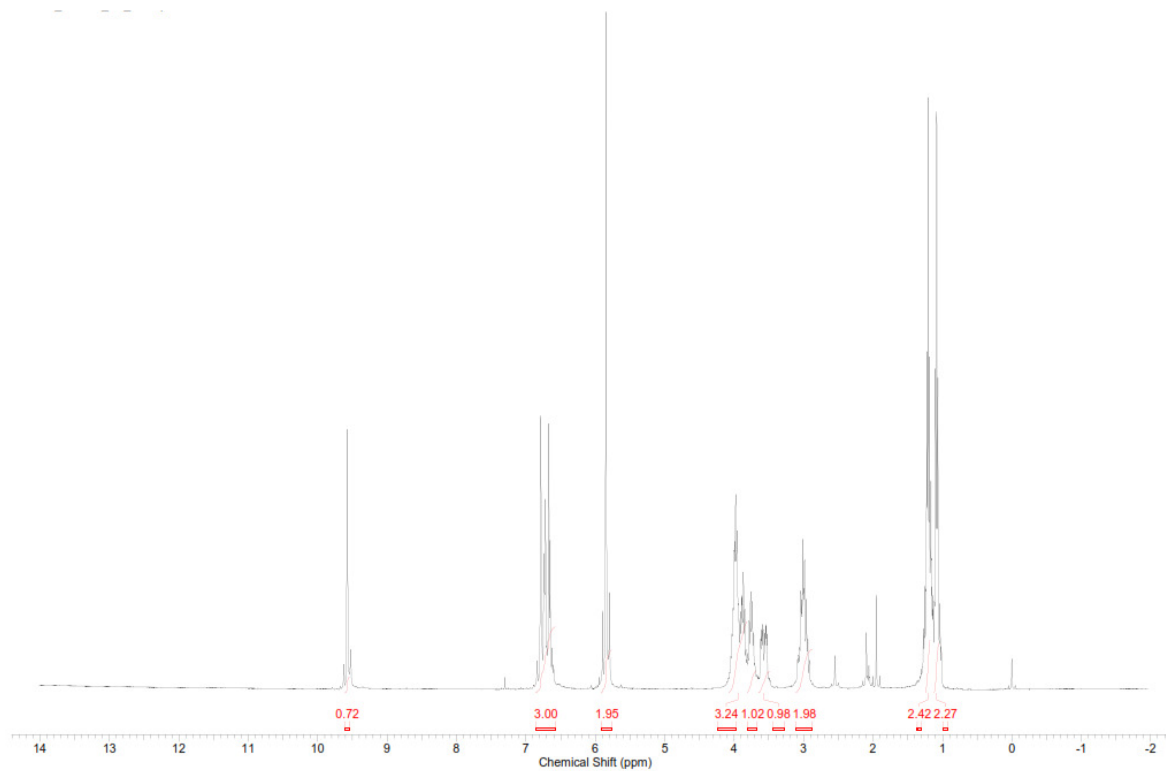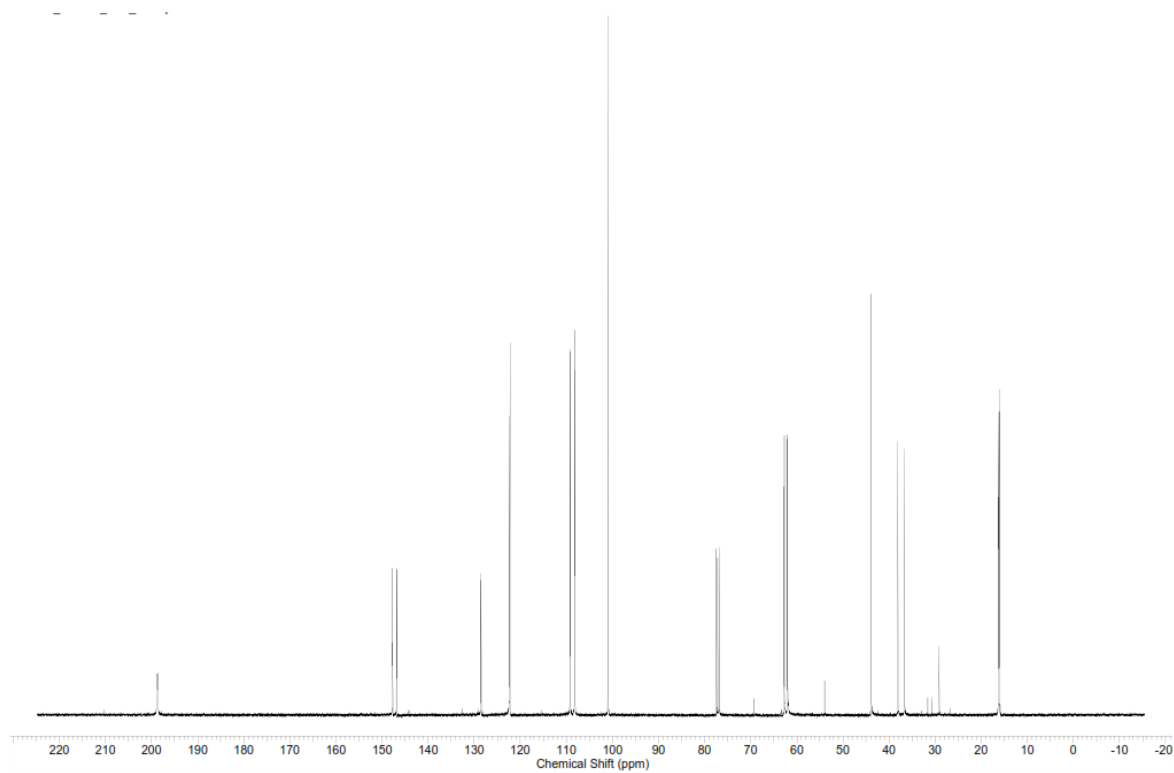

# <sup>1</sup>H NMR and <sup>13</sup>C NMR 10b

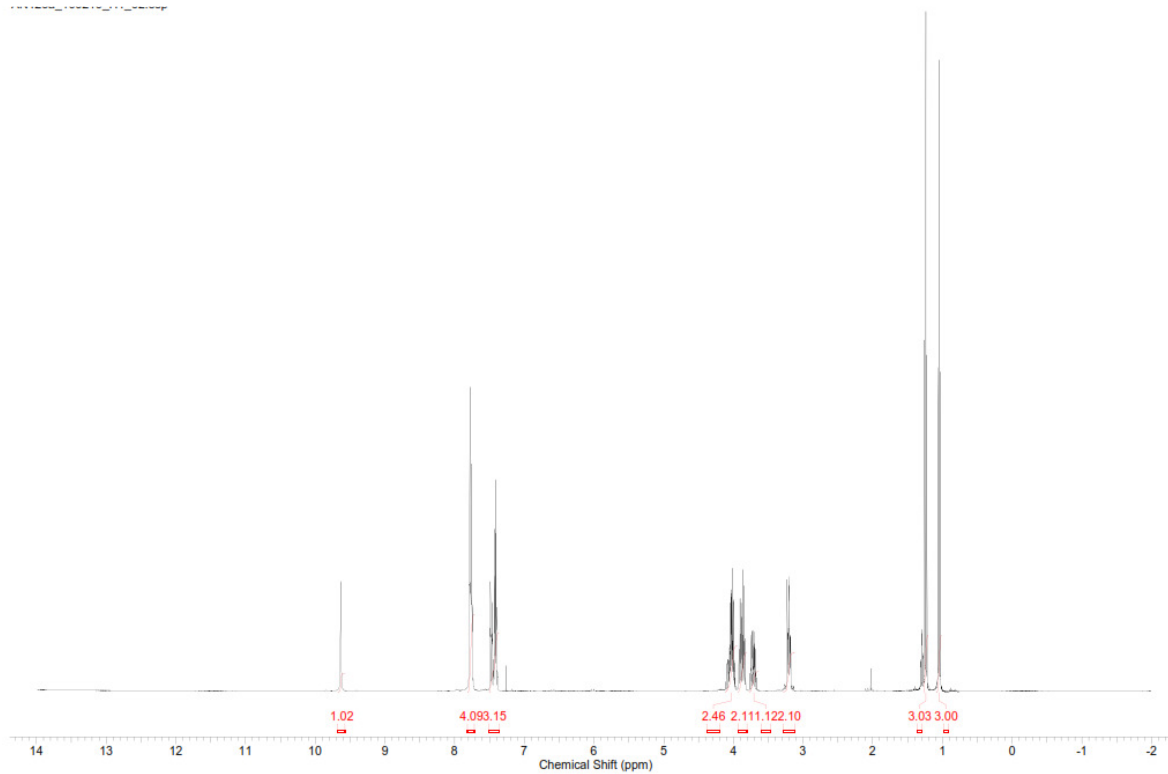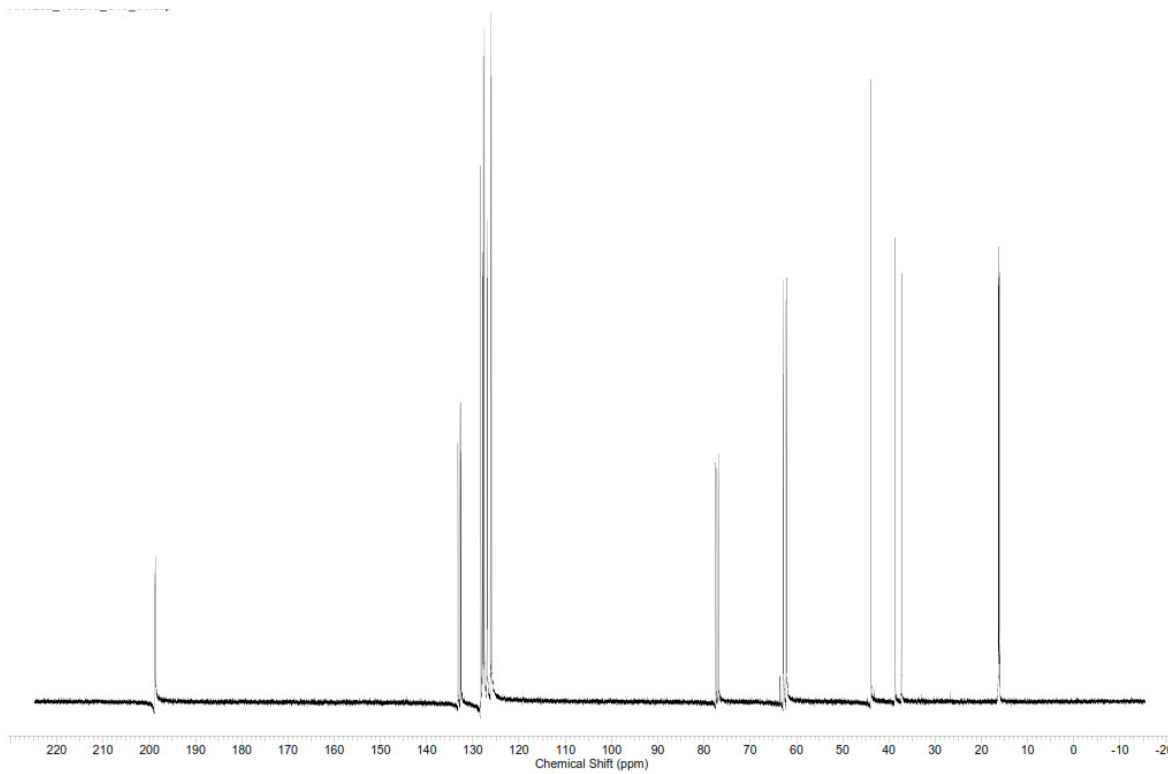

# $^1\text{H}$ NMR and $^{13}\text{C}$ NMR 10c

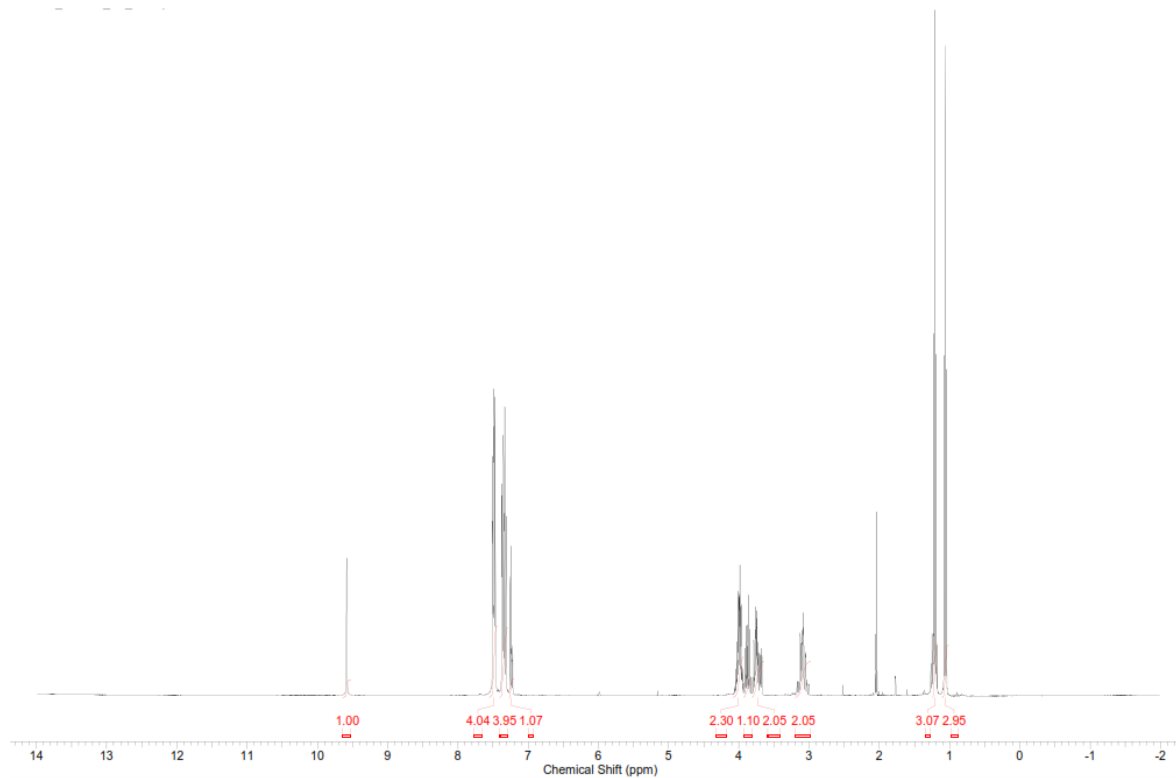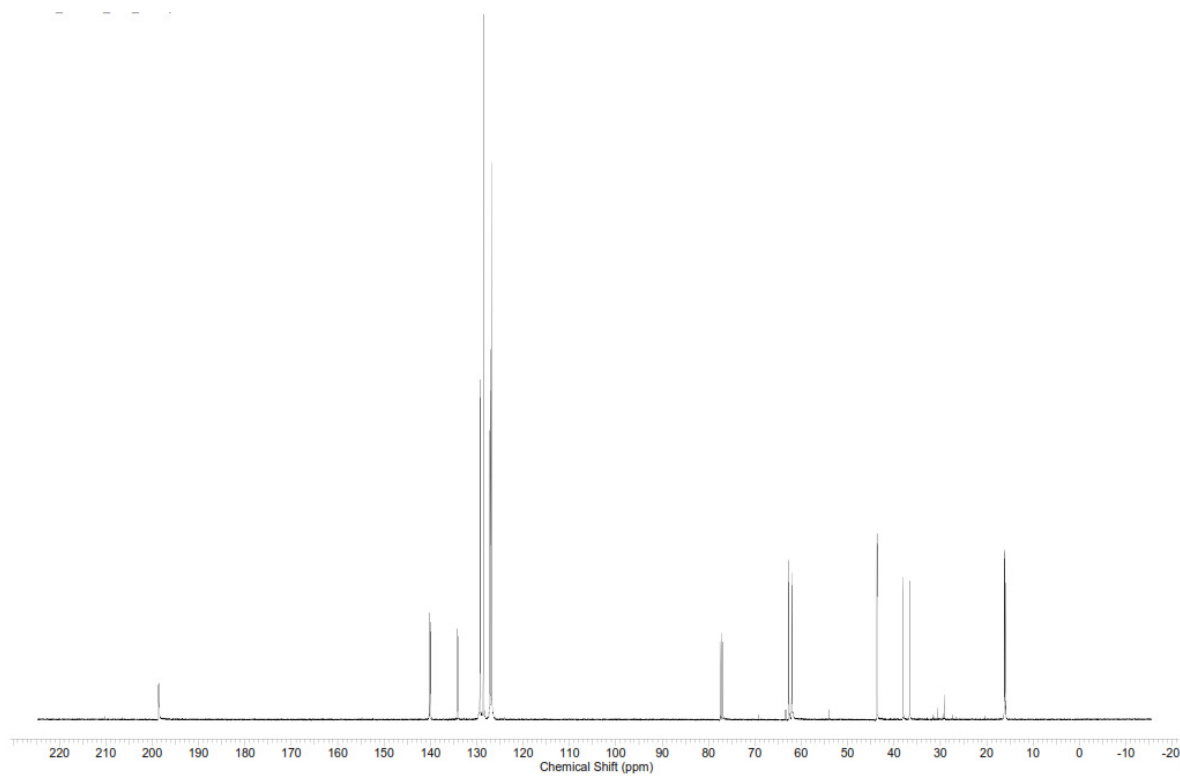

# <sup>1</sup>H NMR and <sup>13</sup>C NMR 10d

CH<sub>3</sub>CH<sub>2</sub>CH<sub>2</sub>CH<sub>2</sub>CH<sub>2</sub>CH<sub>3</sub>

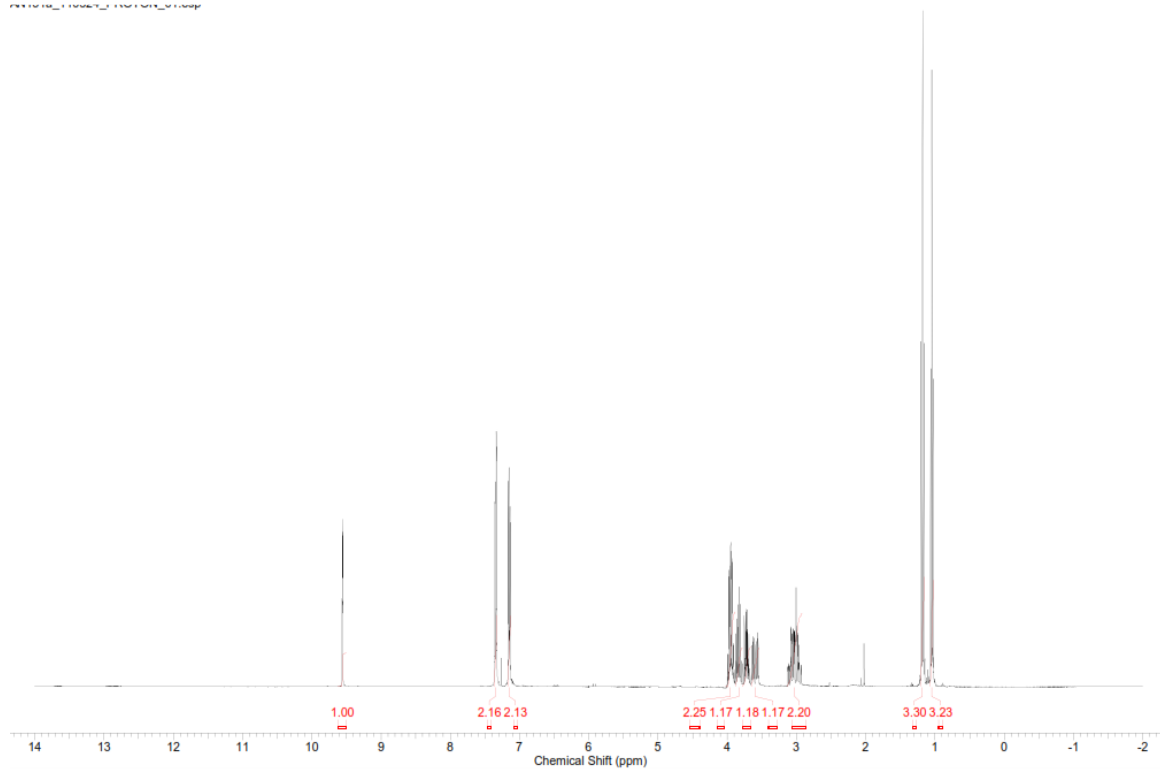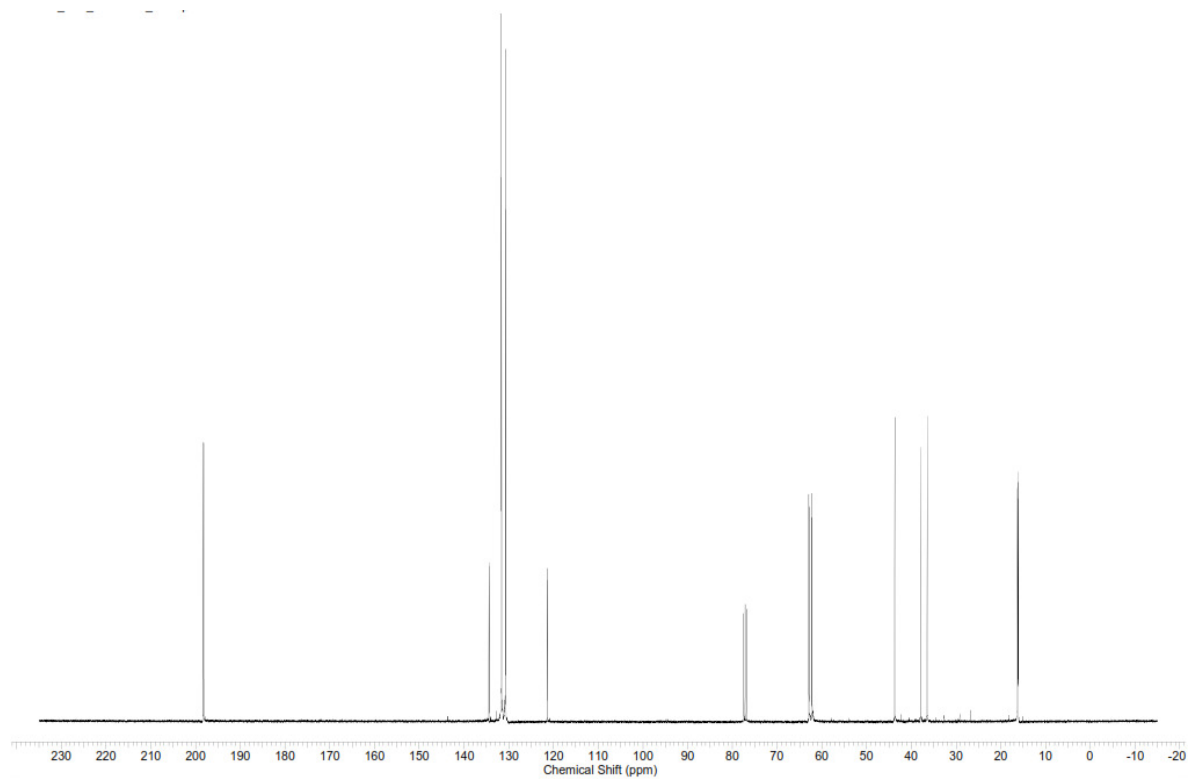

# $^1\text{H}$ NMR and $^{13}\text{C}$ NMR 10e

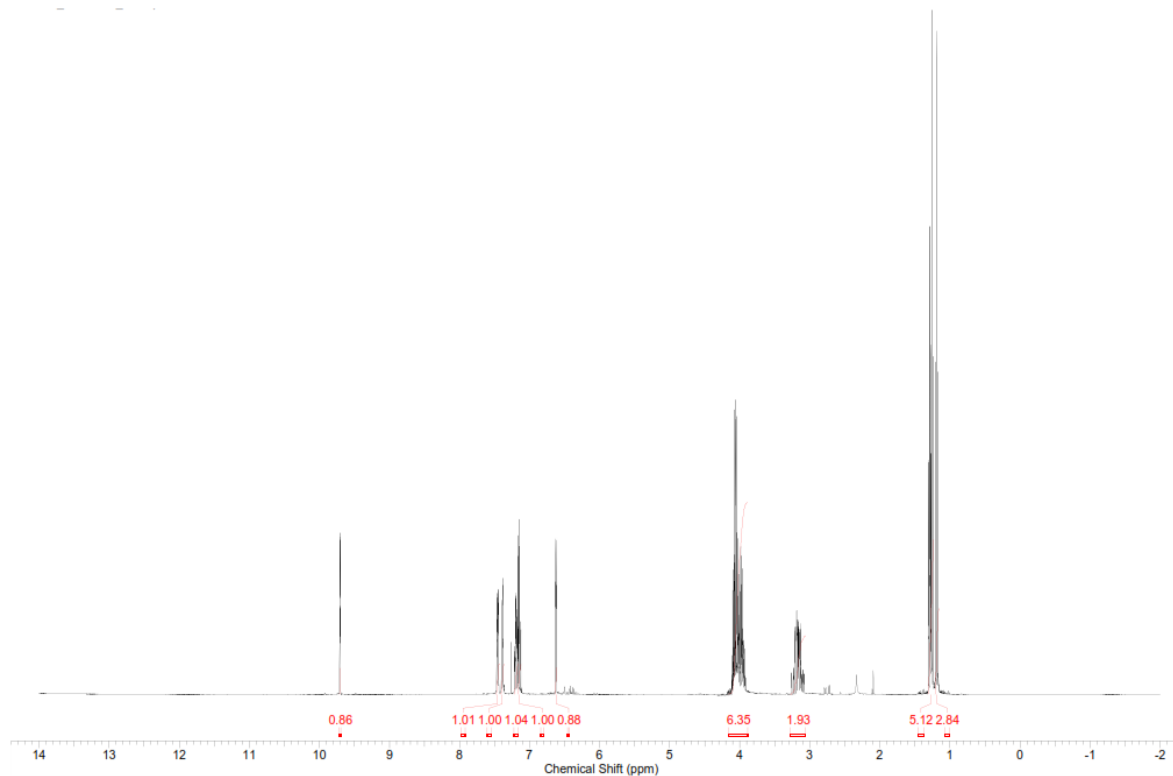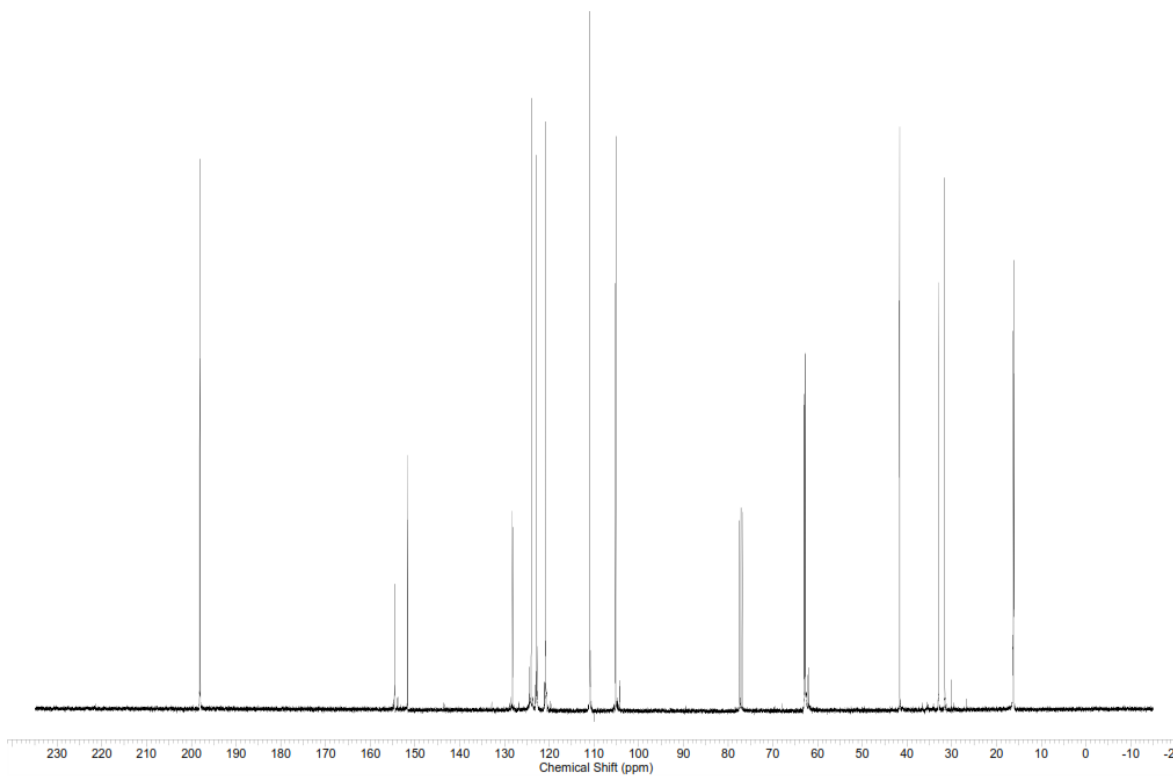

# $^1\text{H}$ NMR and $^{13}\text{C}$ NMR 11a

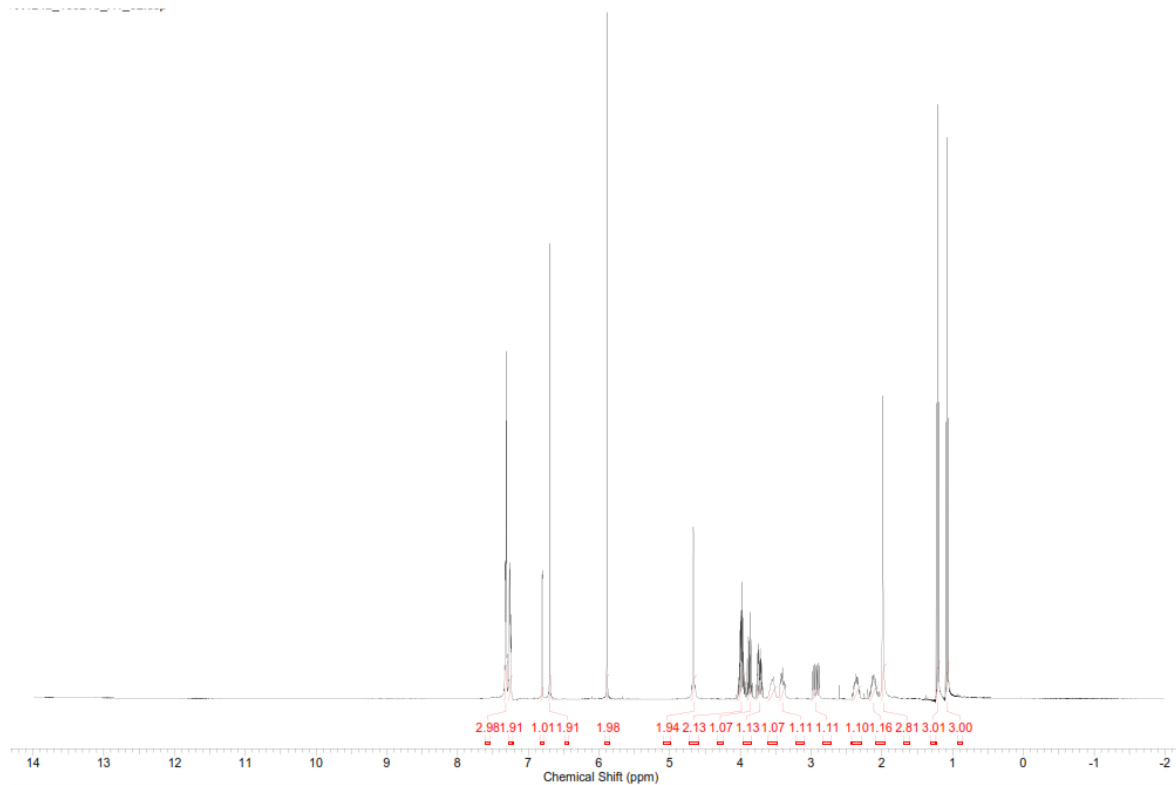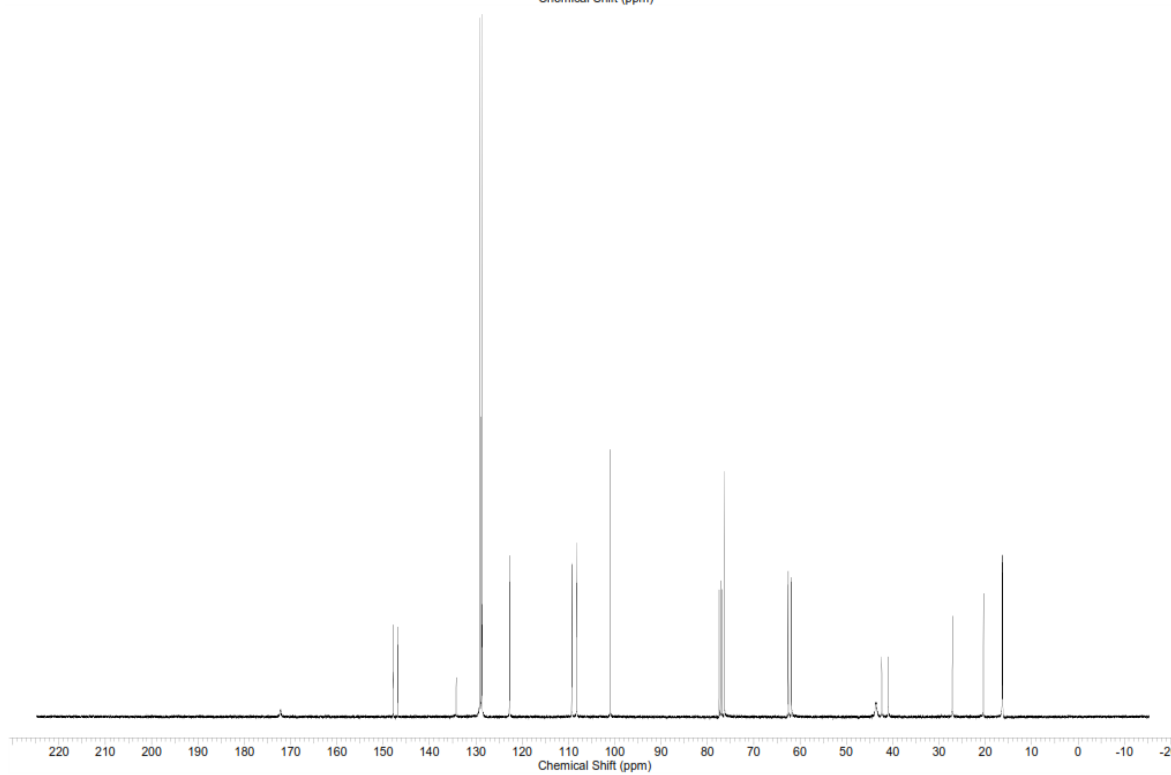



# <sup>1</sup>H NMR and <sup>13</sup>C NMR 11b

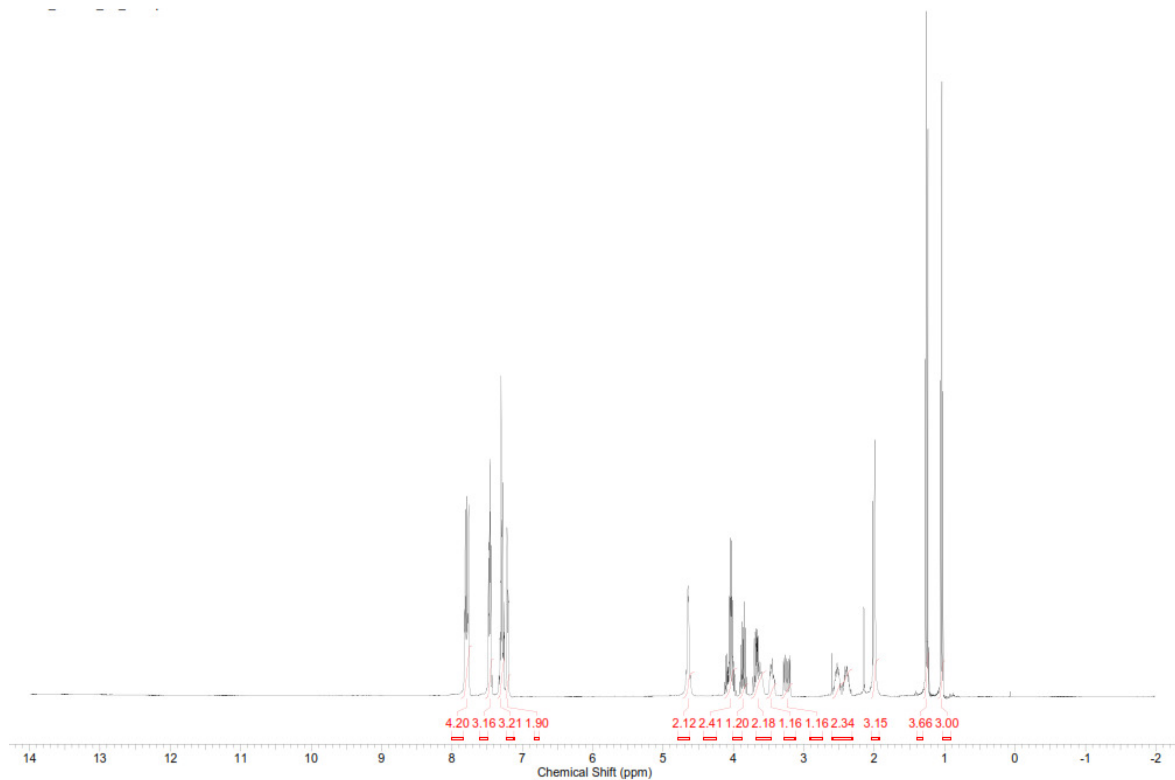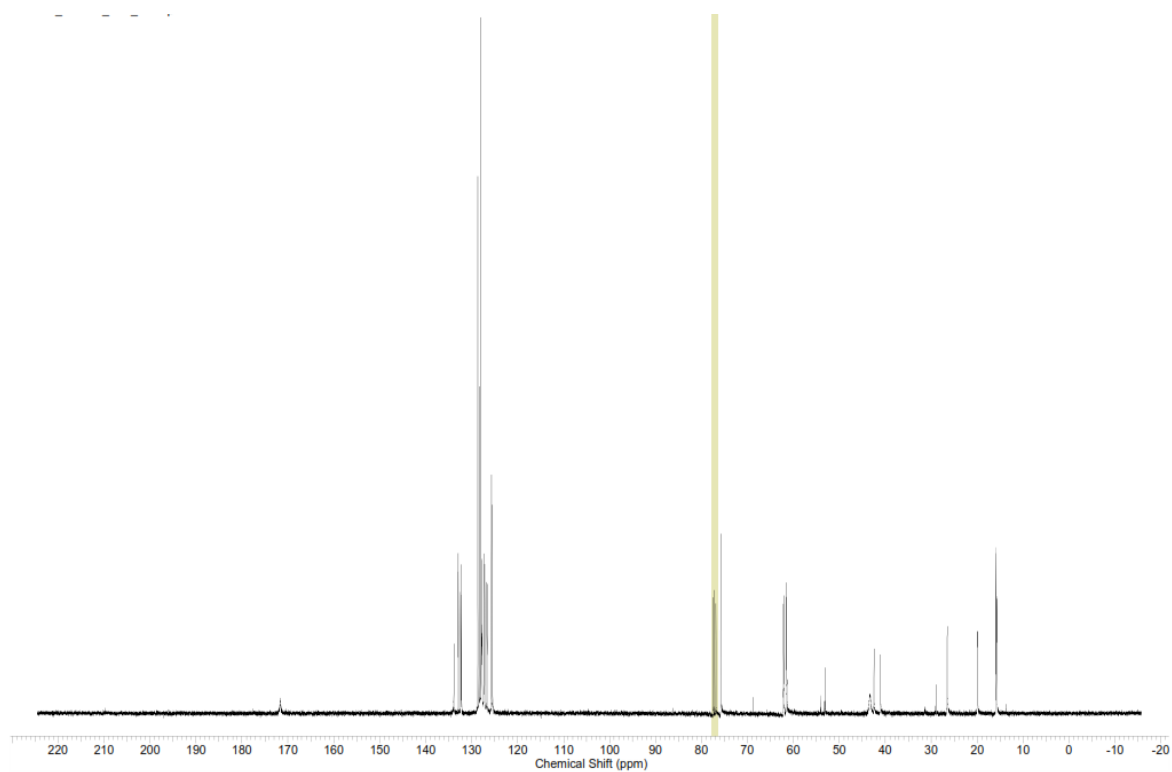

# $^1\text{H}$ NMR and $^{13}\text{C}$ NMR 11c

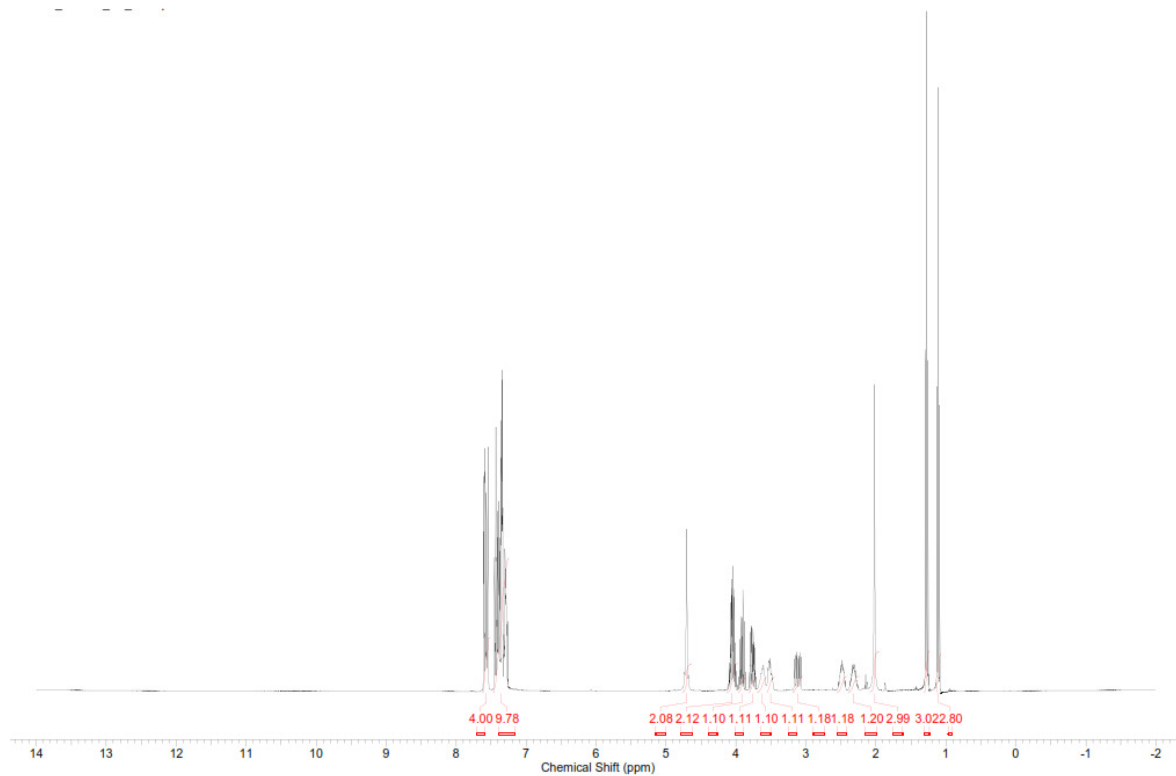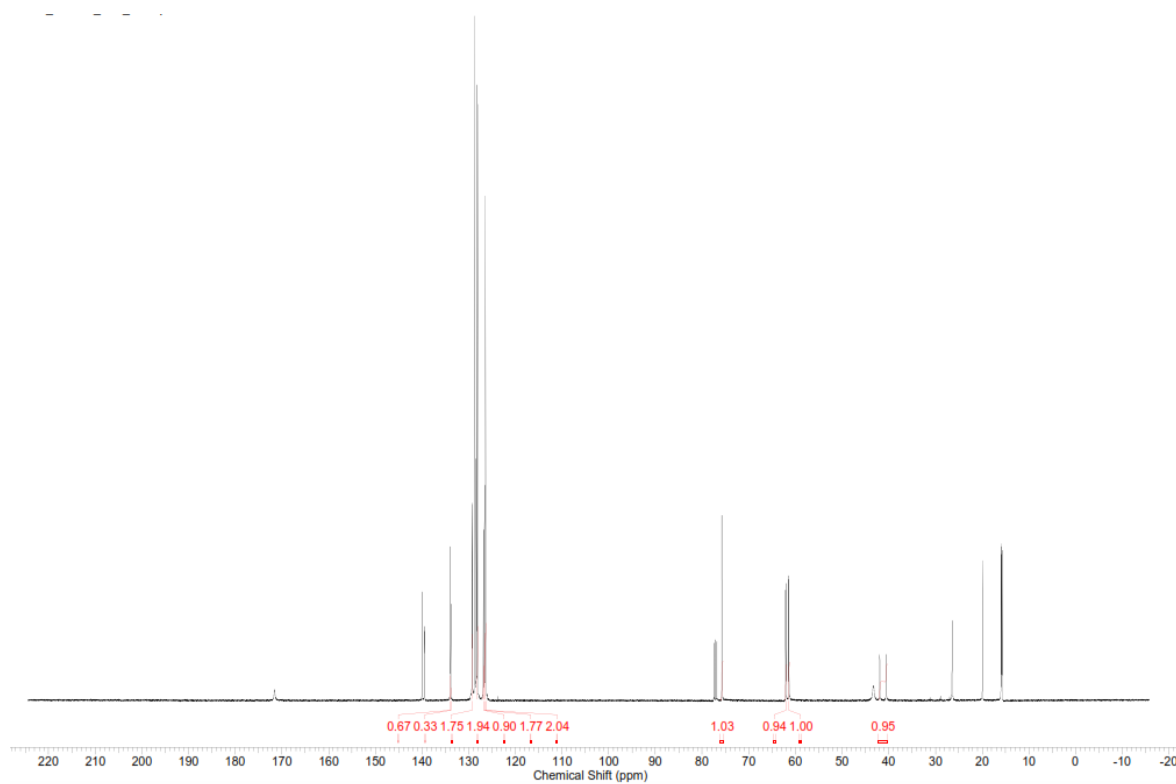

# $^1\text{H}$ NMR and $^{13}\text{C}$ NMR 11d

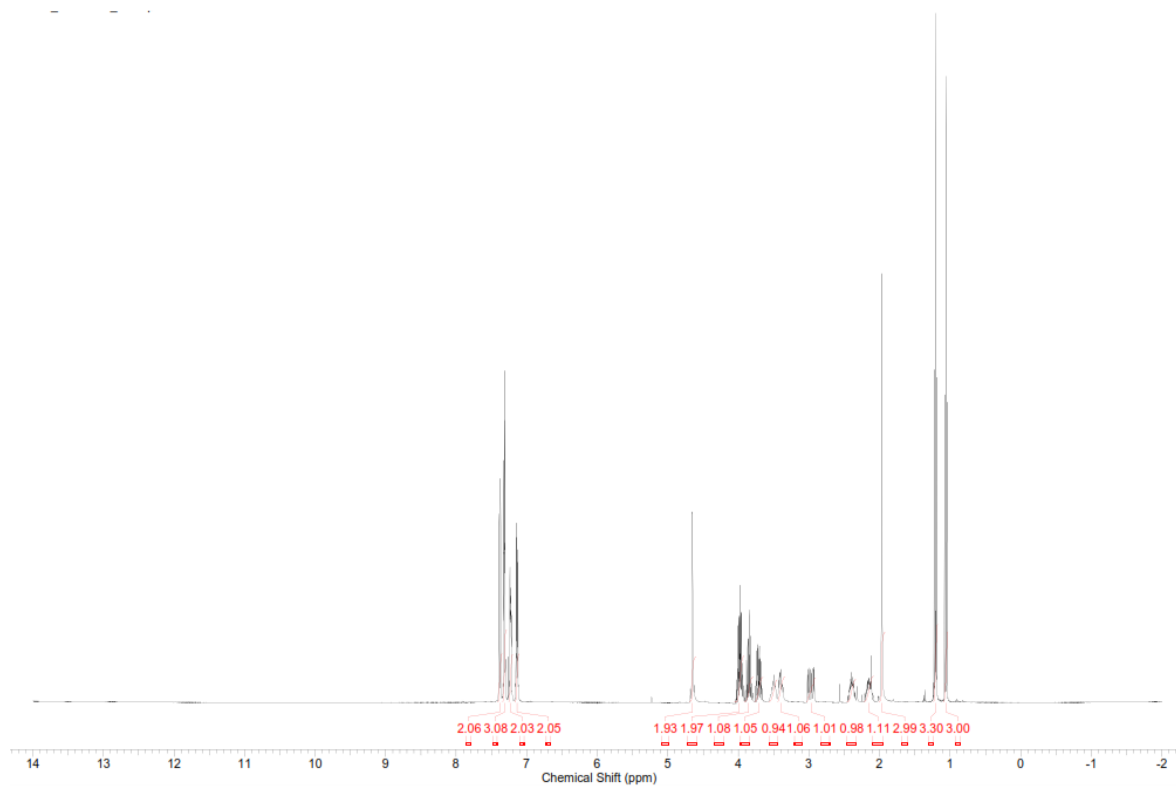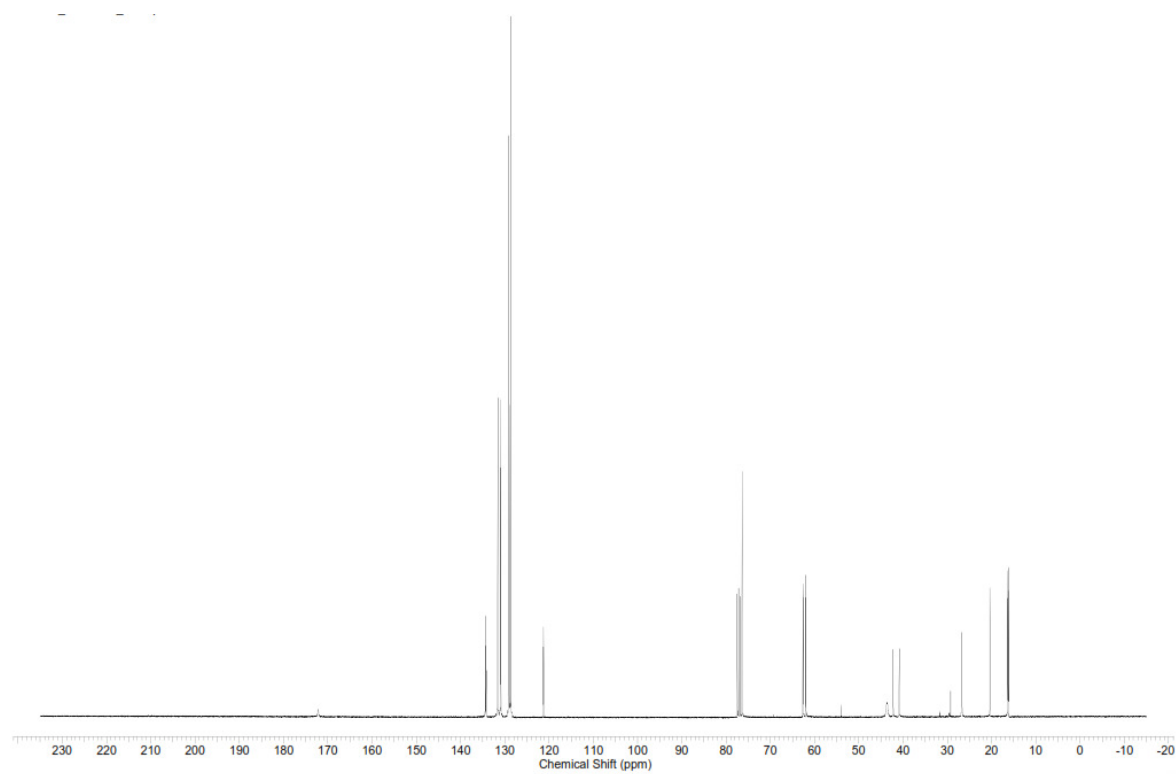

# $^1\text{H}$ NMR and $^{13}\text{C}$ NMR 11e

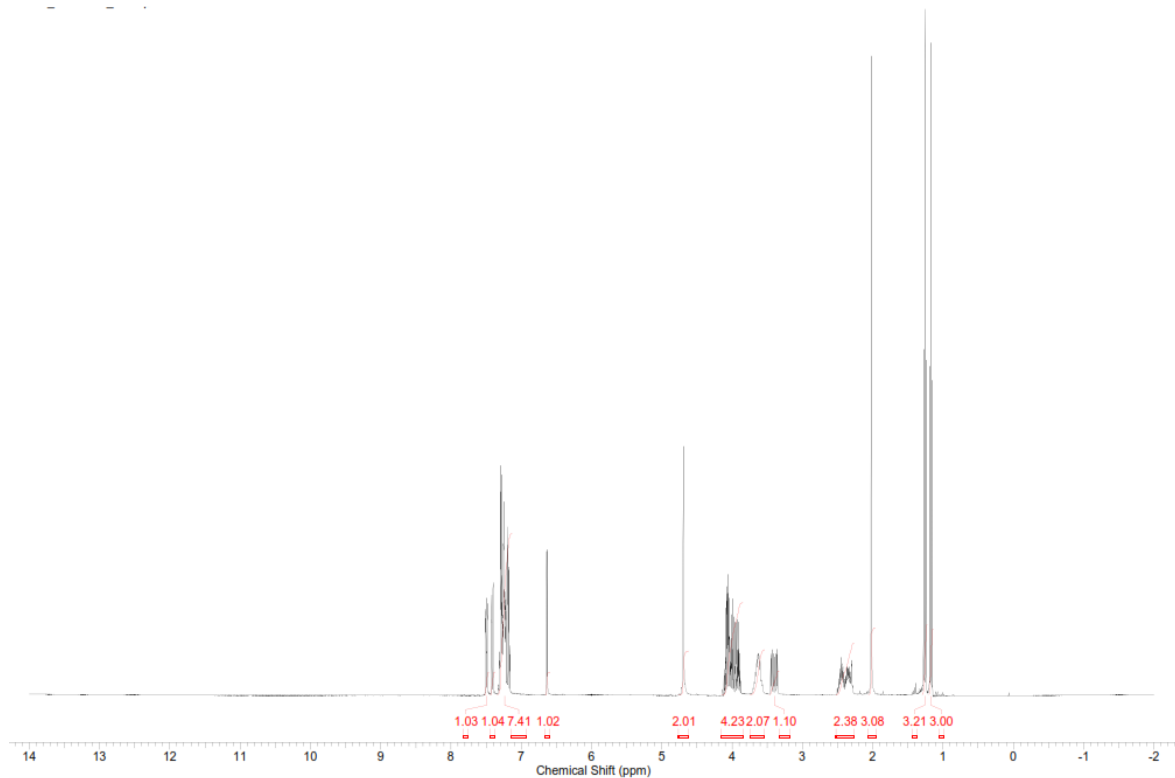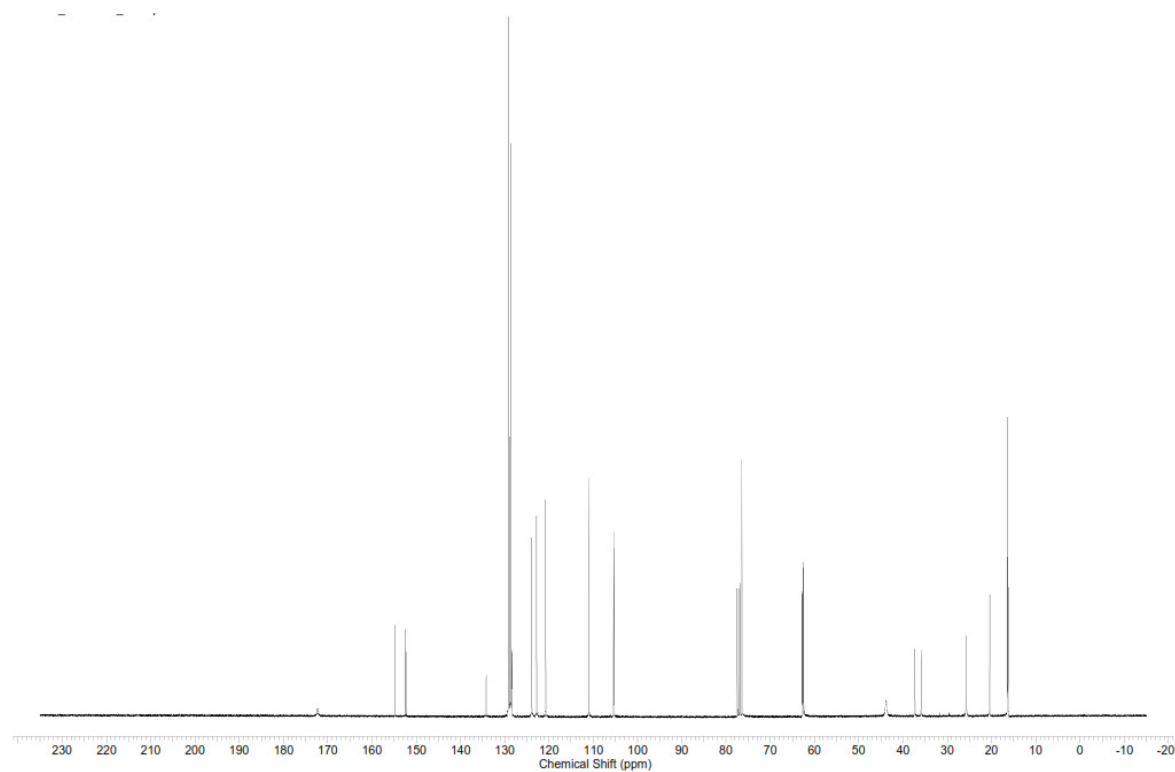

# $^1\text{H}$ NMR and $^{13}\text{C}$ NMR 11f

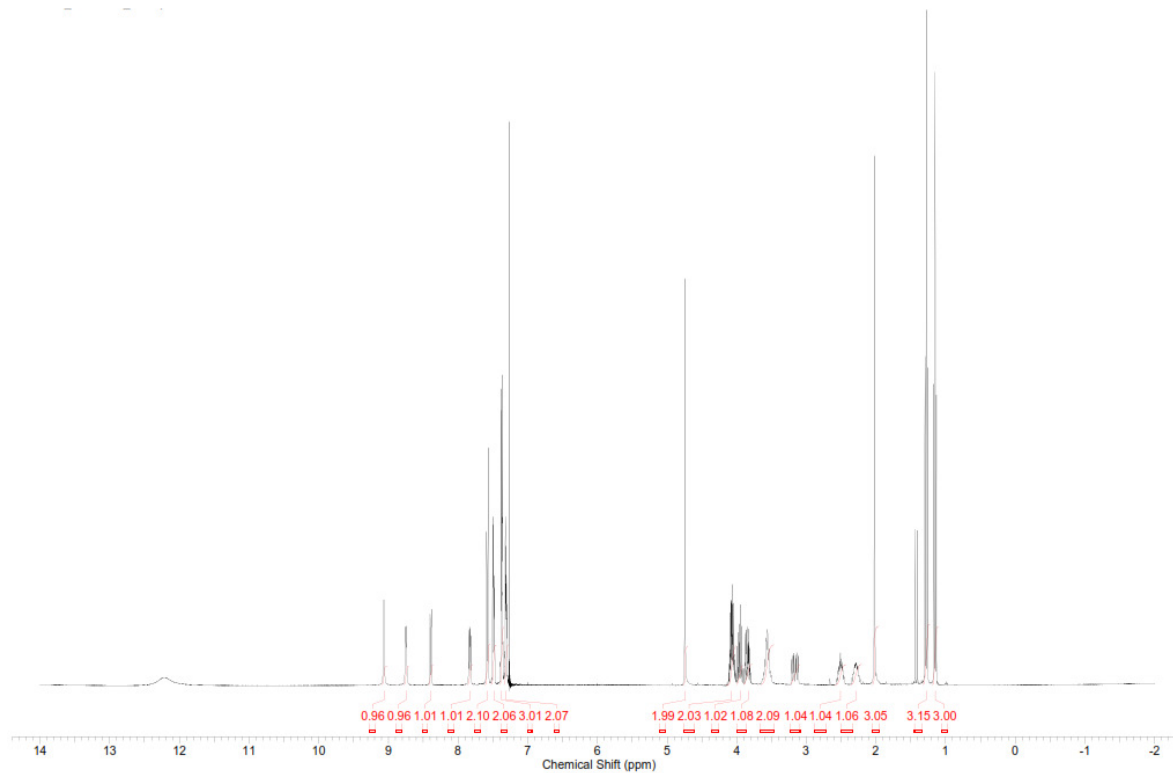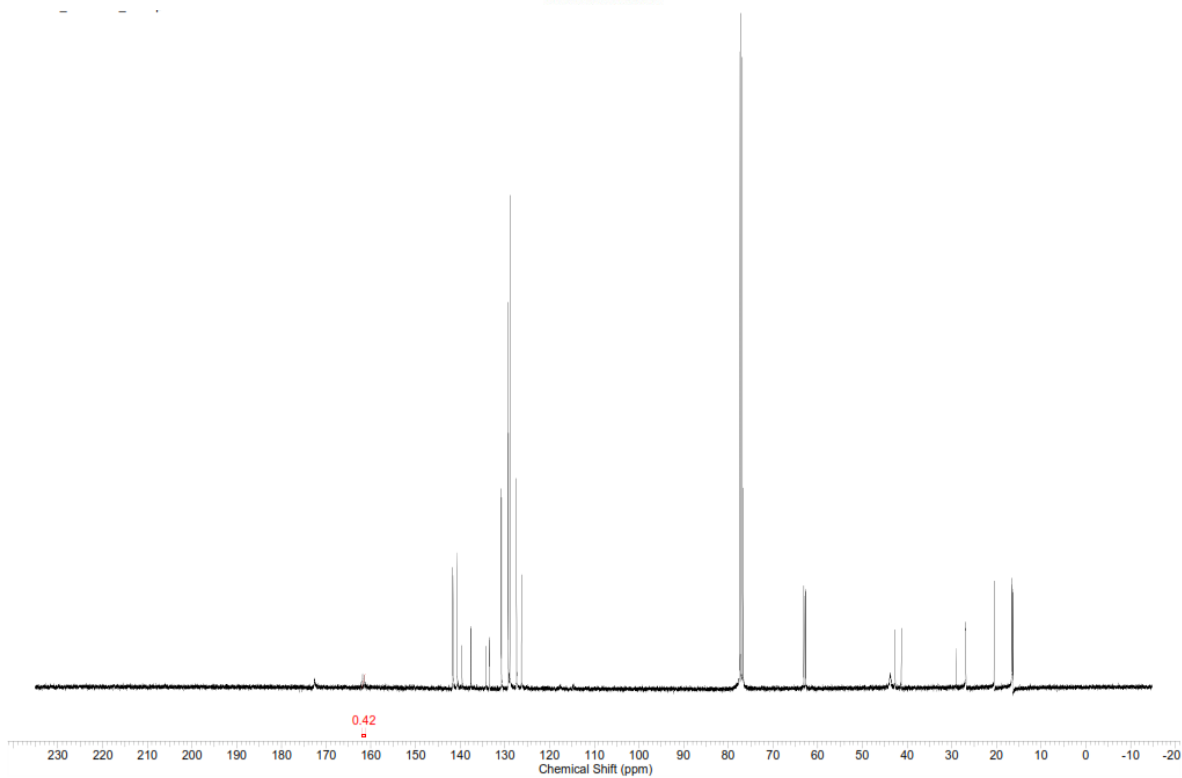

# $^1\text{H}$ NMR and $^{13}\text{C}$ NMR 11g

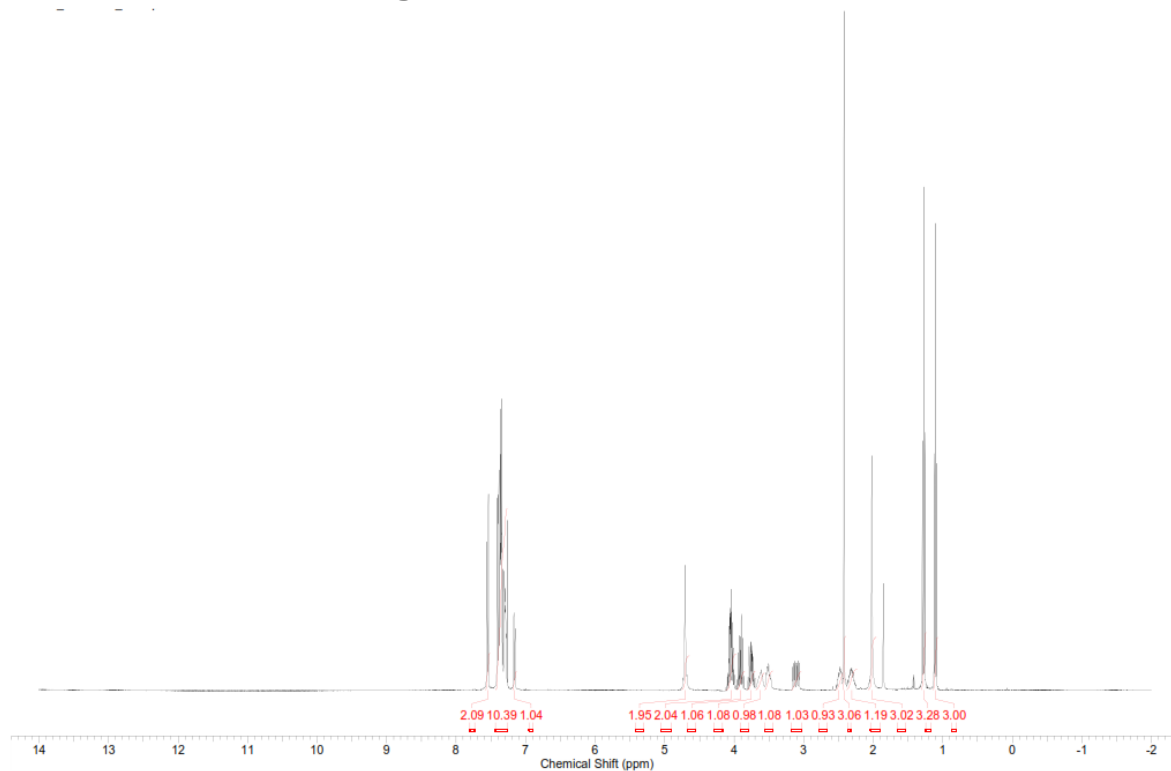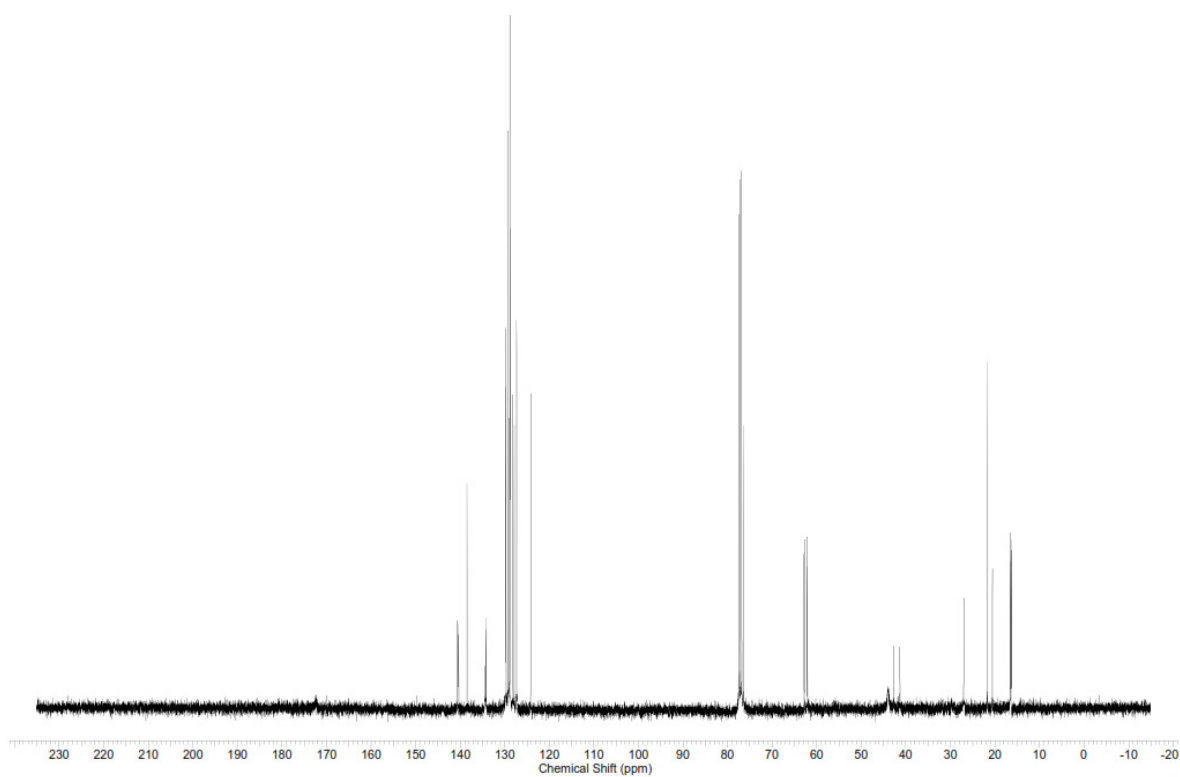

# <sup>1</sup>H NMR and <sup>13</sup>C NMR 11h

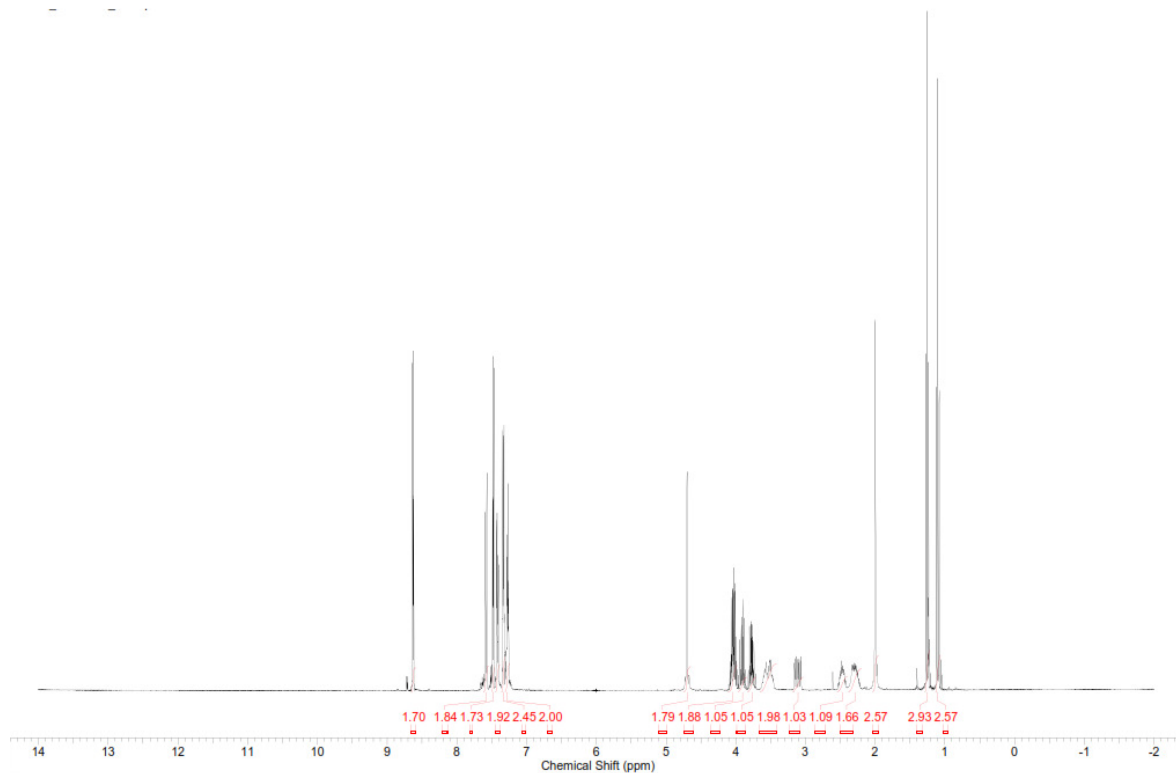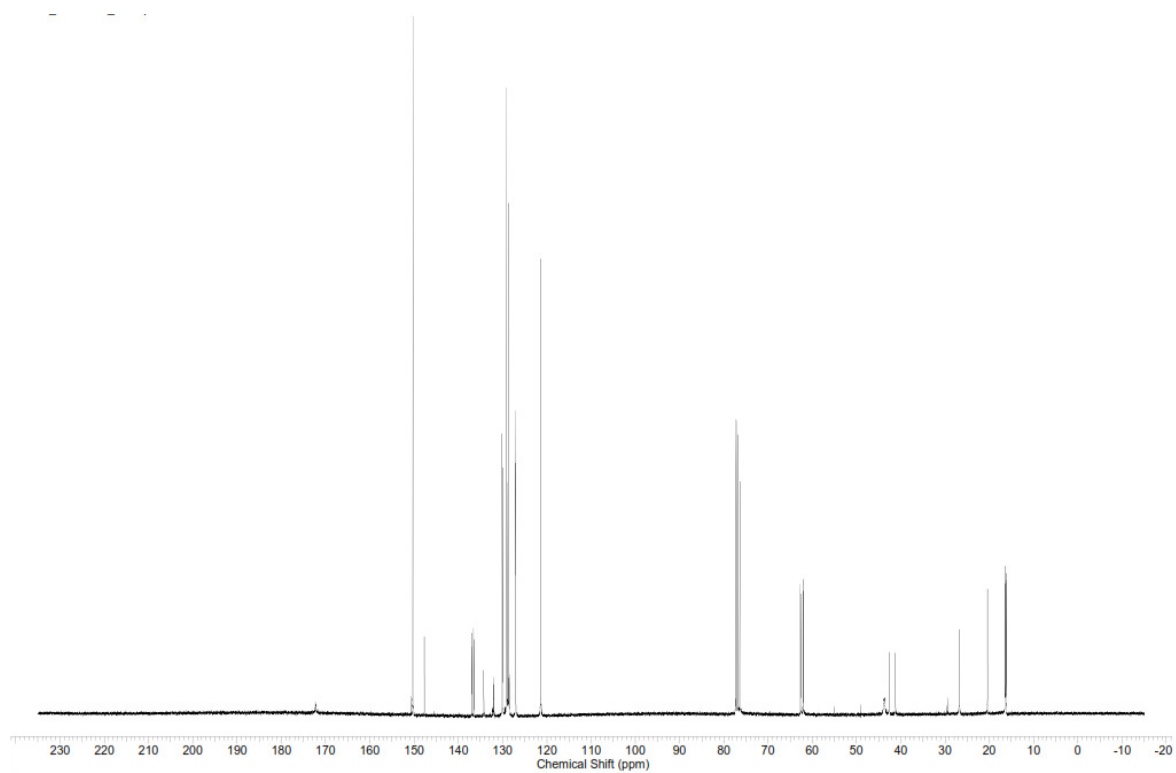

# $^1\text{H}$ NMR and $^{13}\text{C}$ NMR 11i

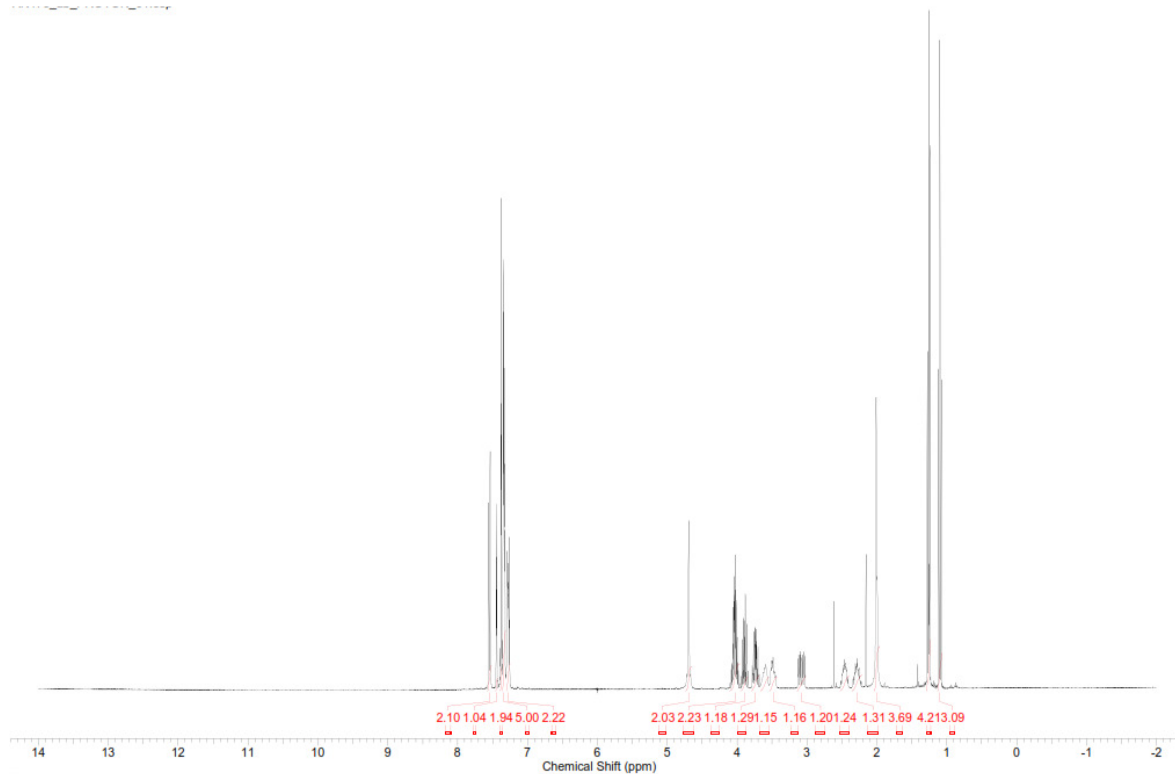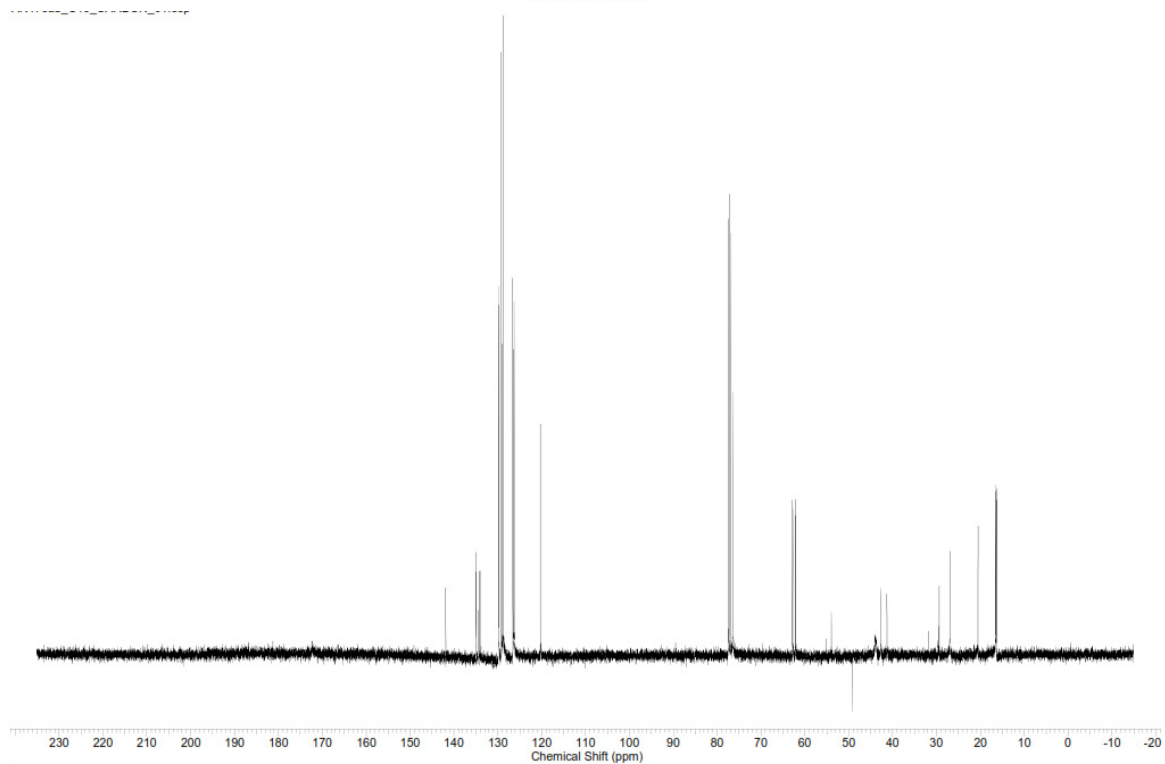



# <sup>1</sup>H NMR and <sup>13</sup>C NMR 11j

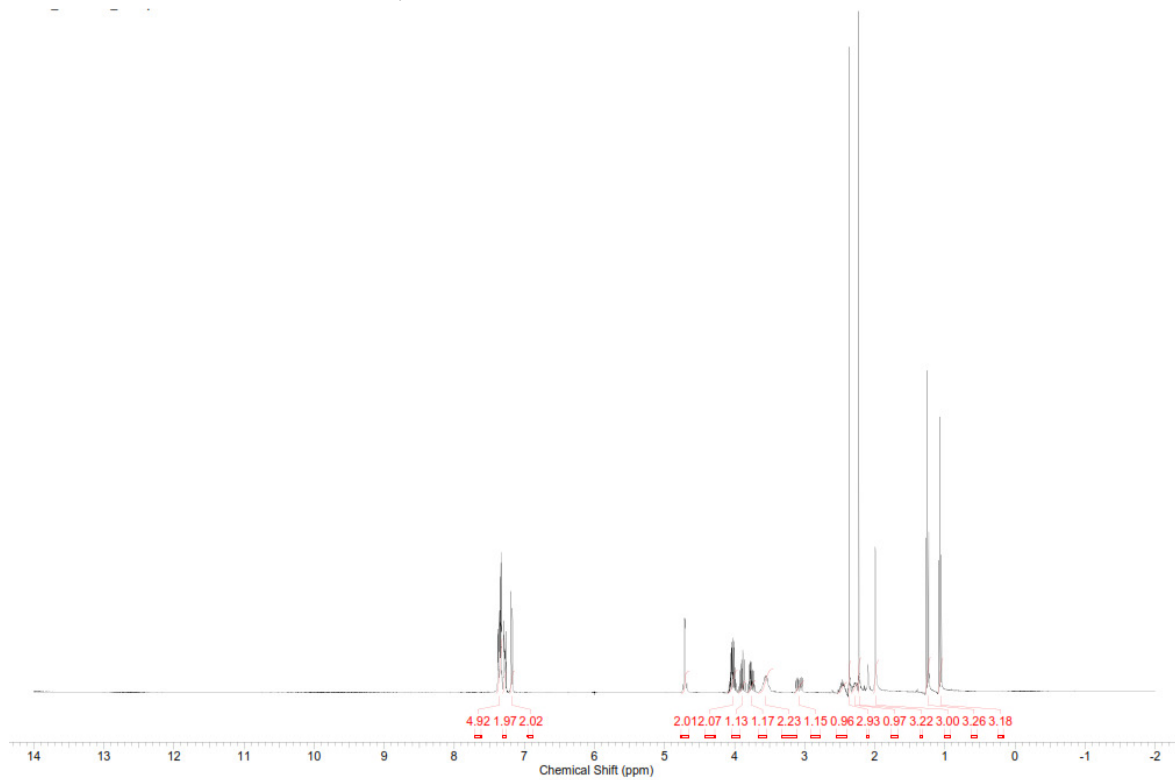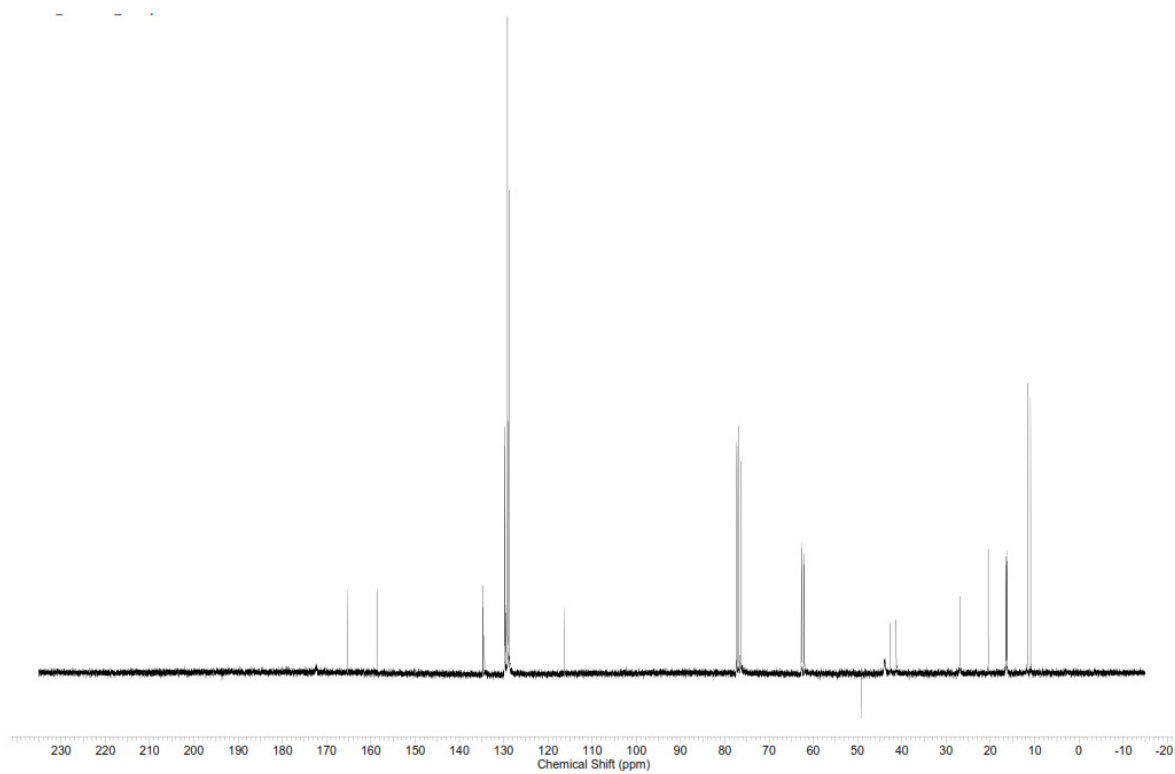

# $^1\text{H}$ NMR and $^{13}\text{C}$ NMR 11k

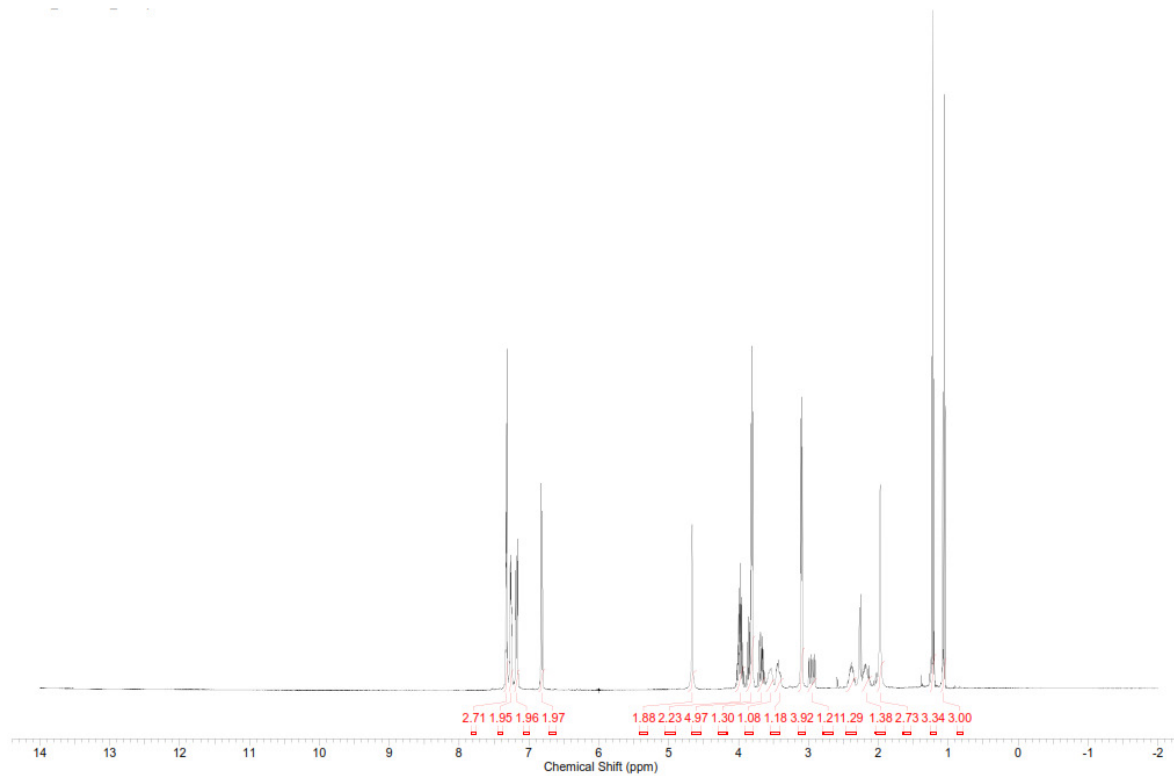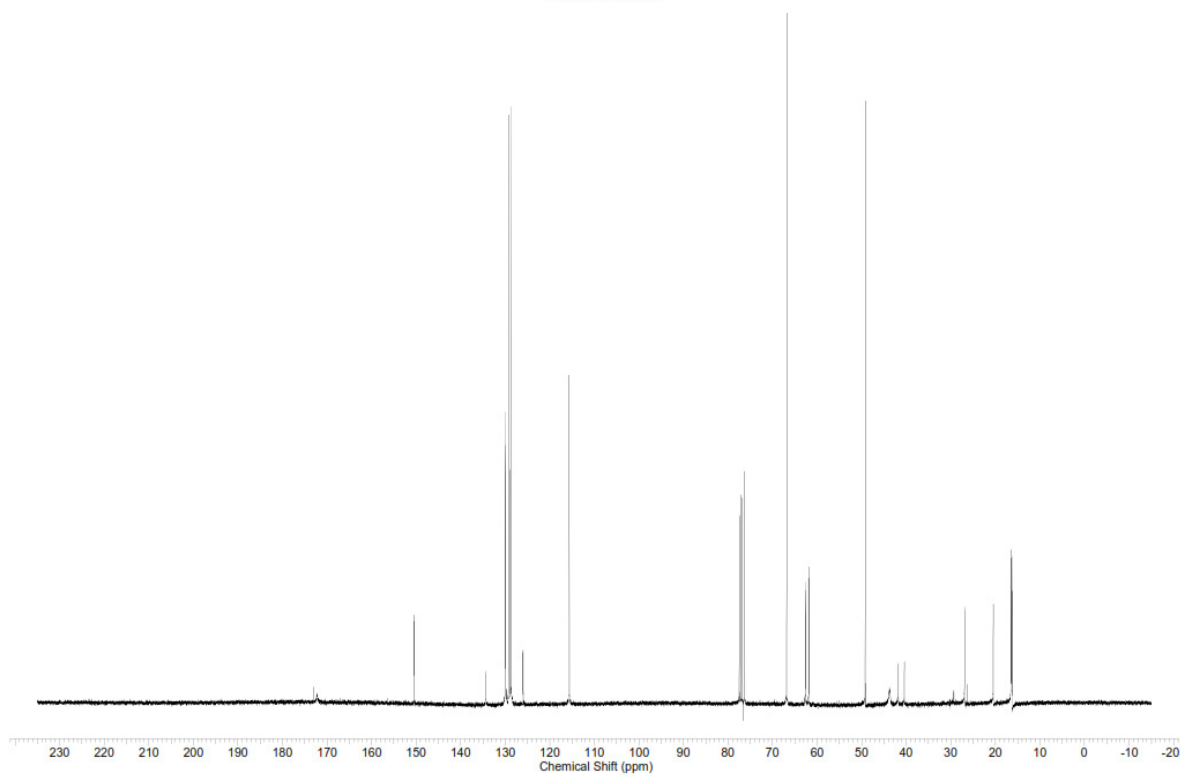

# $^1\text{H}$ NMR and $^{13}\text{C}$ NMR 12a

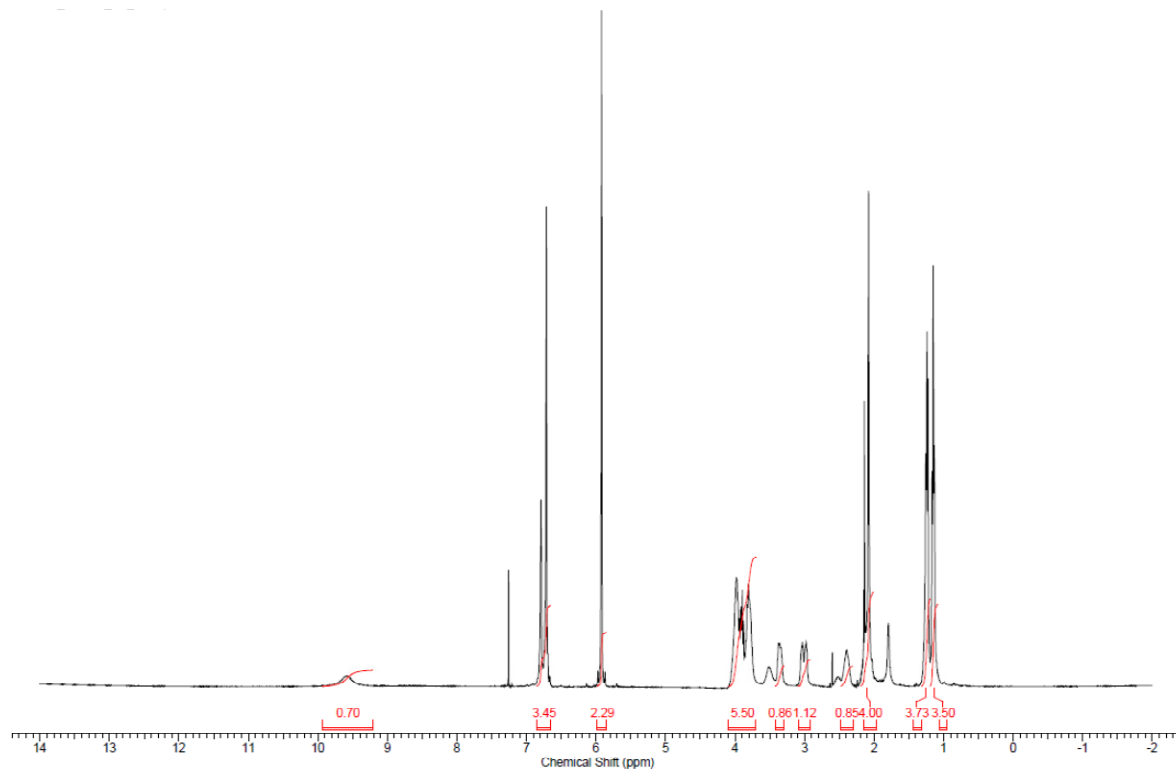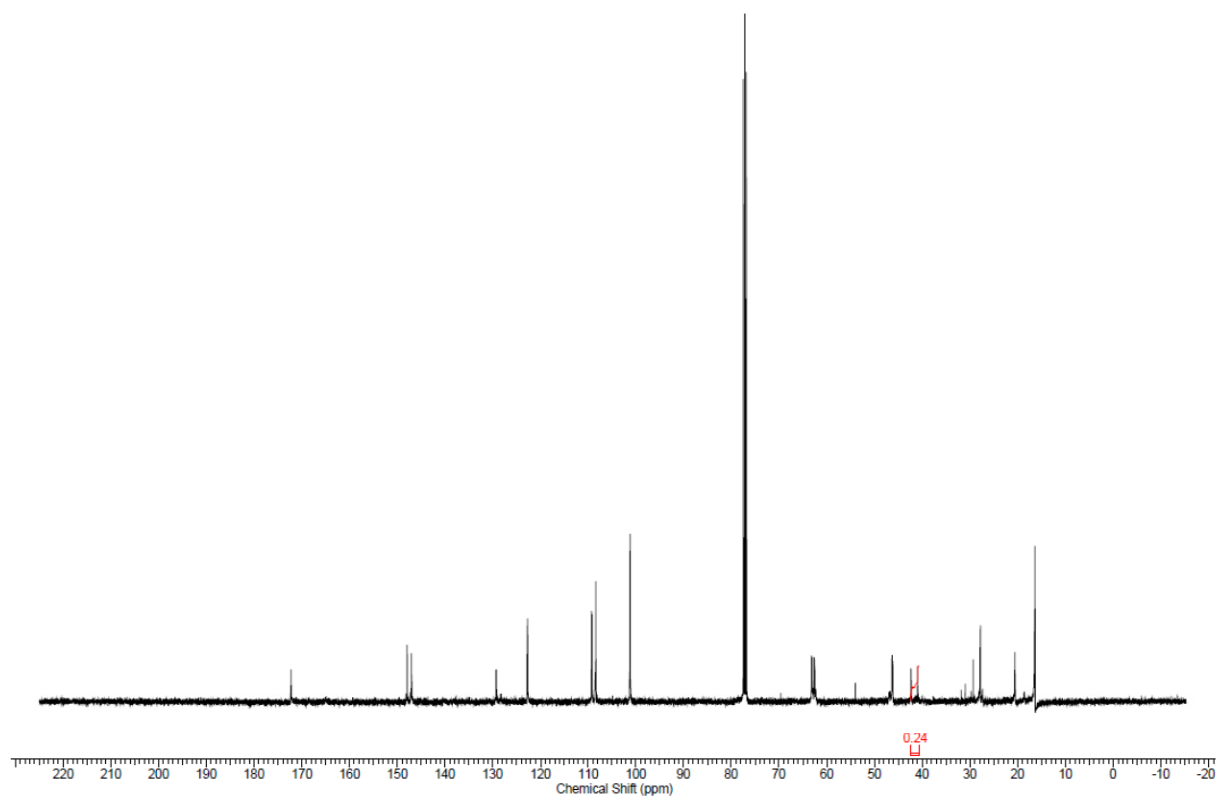

# $^1\text{H}$ NMR and $^{13}\text{C}$ NMR 12b

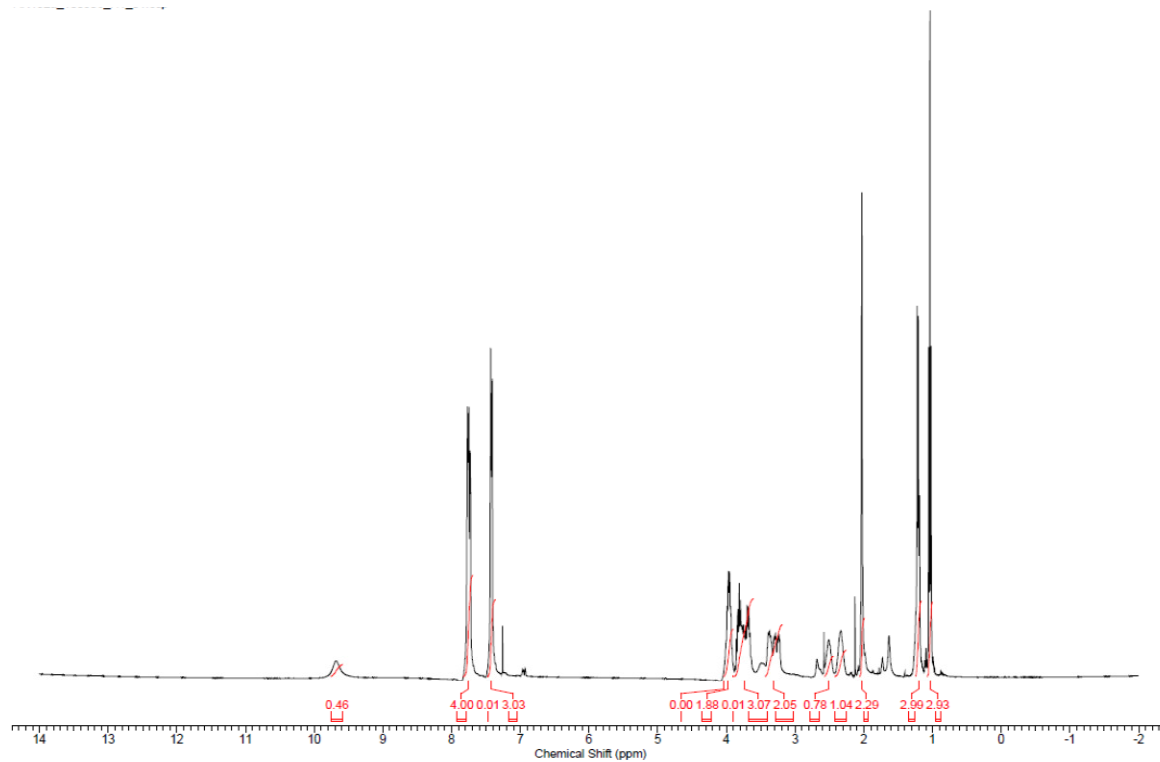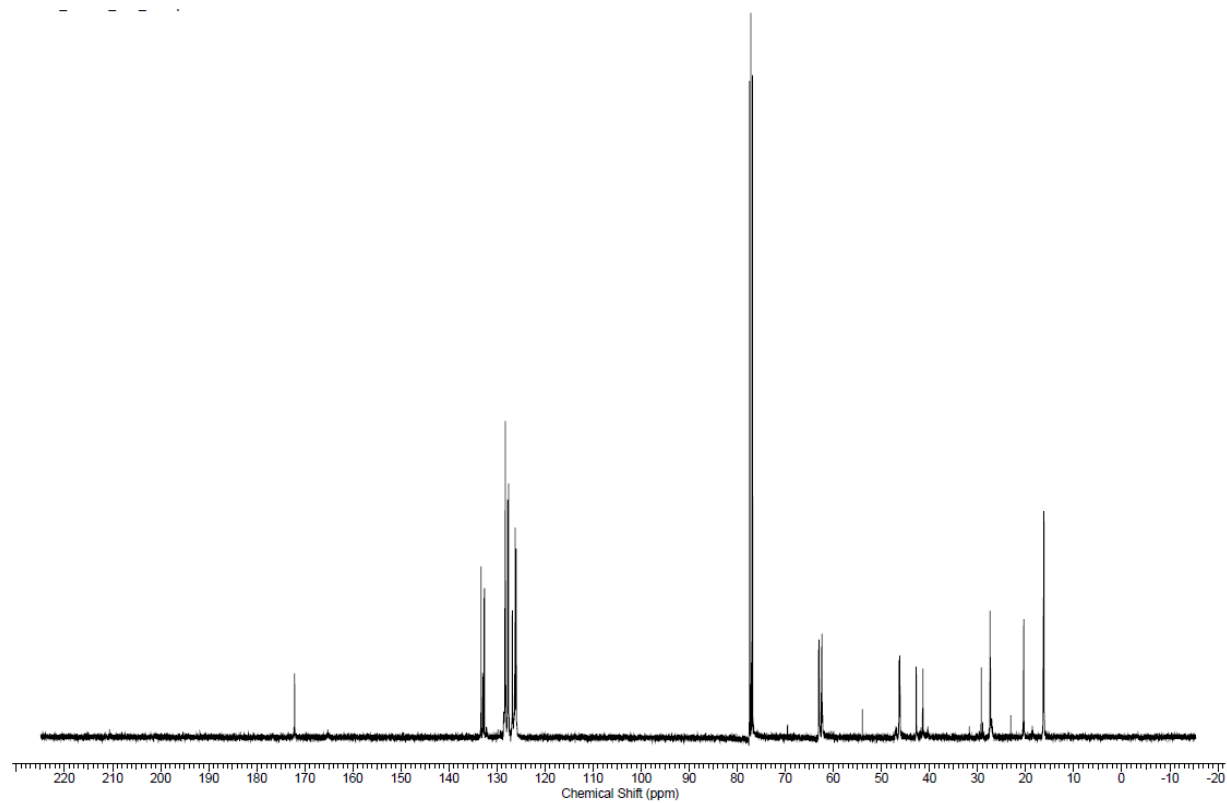

# $^1\text{H}$ NMR and $^{13}\text{C}$ NMR 12c

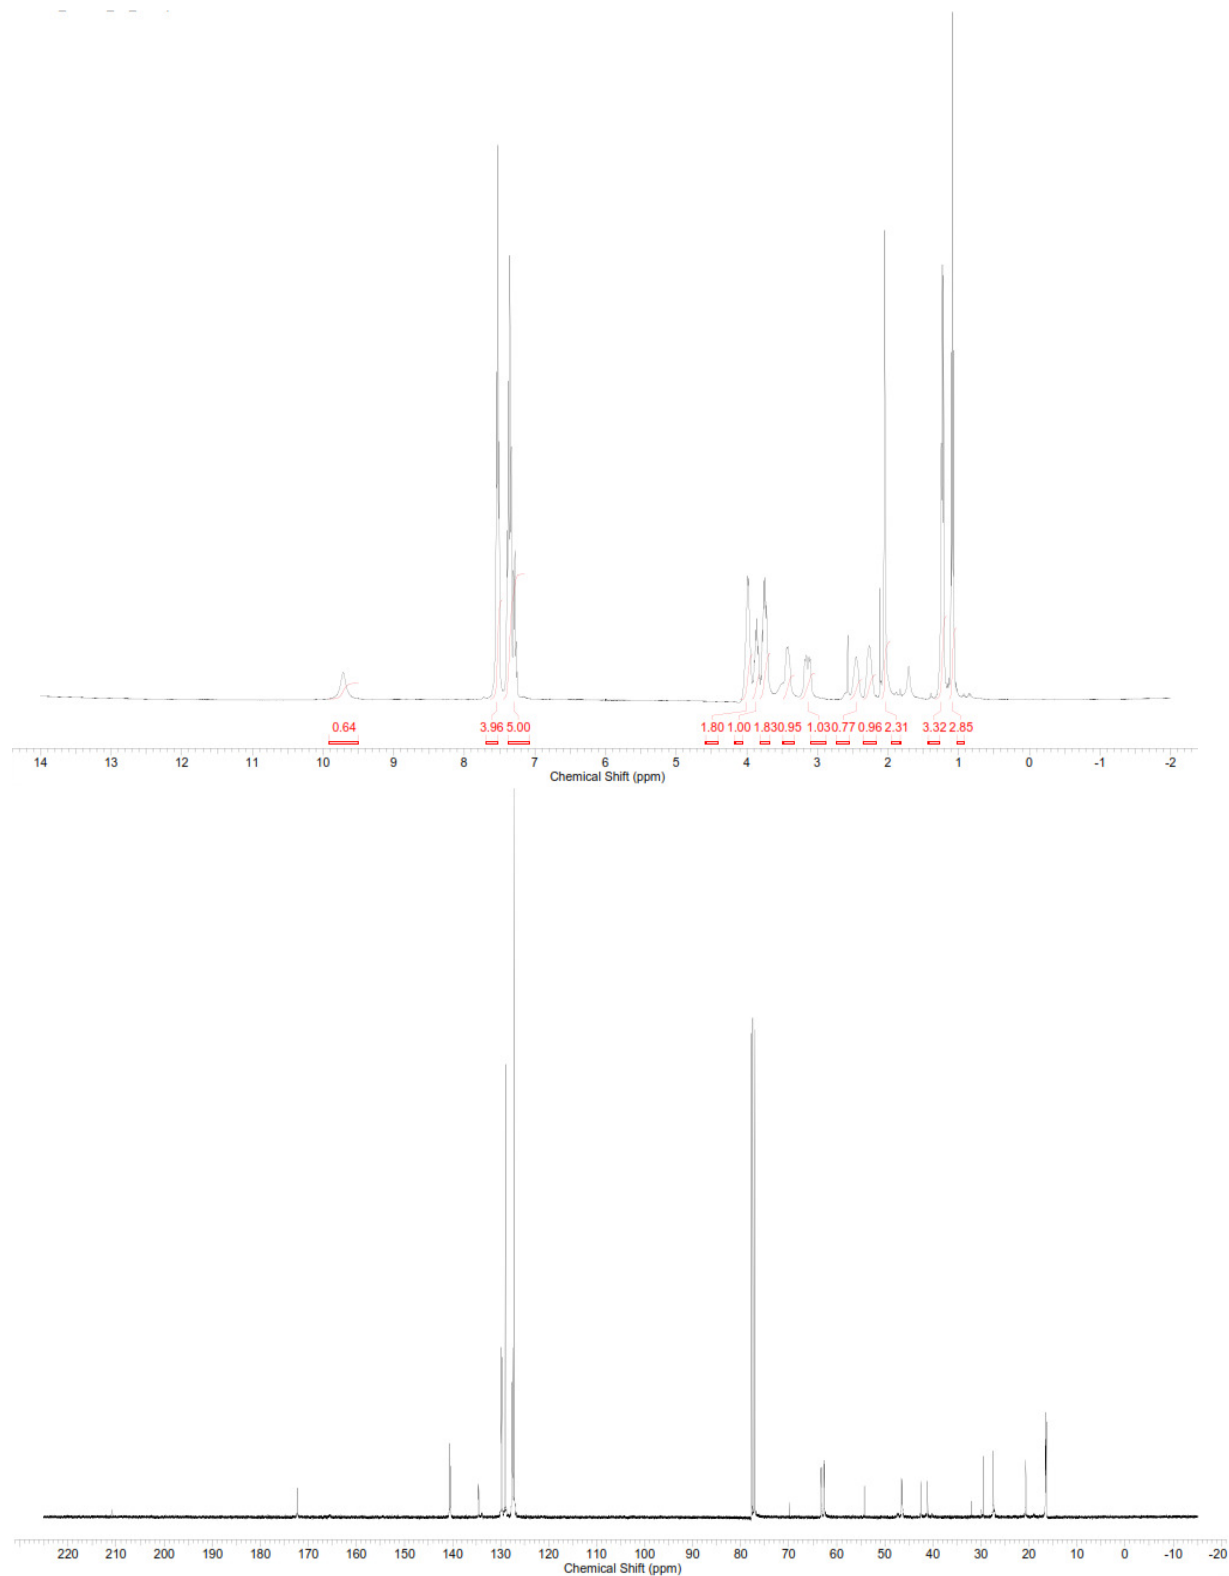

# $^1\text{H}$ NMR and $^{13}\text{C}$ NMR 12d

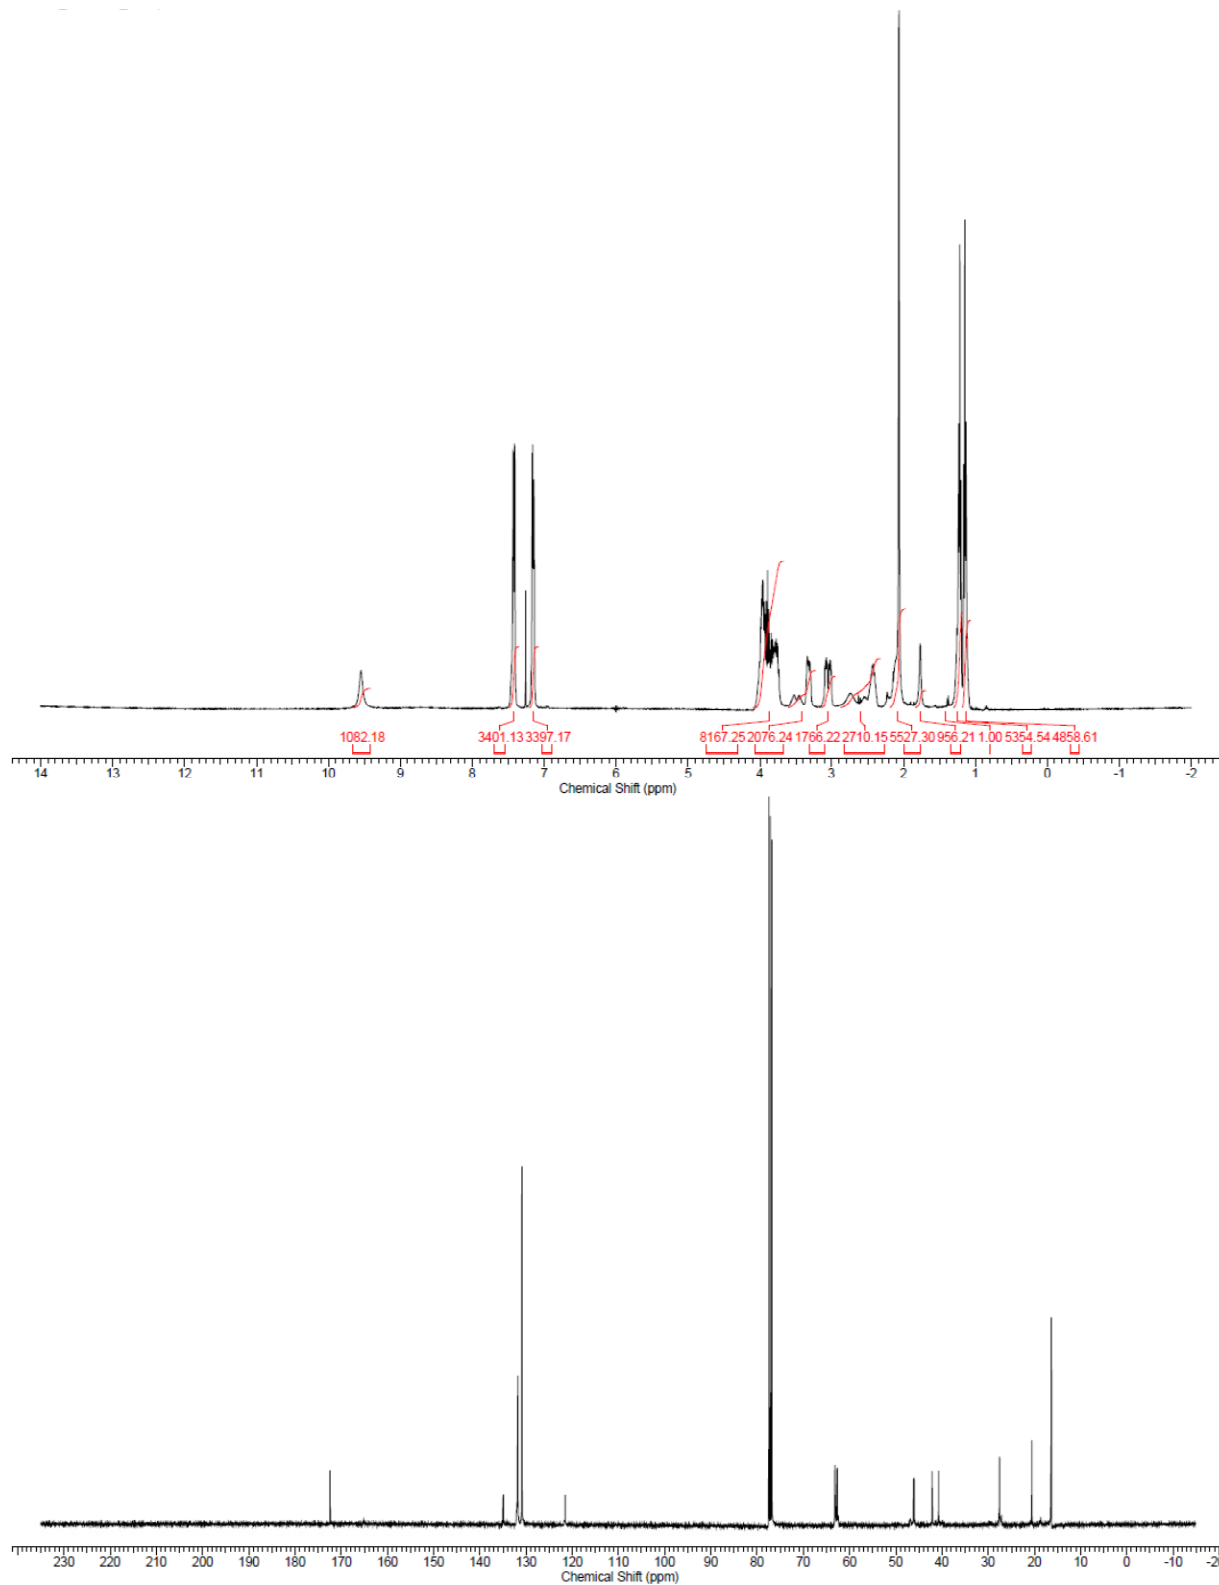

**<sup>1</sup>H NMR, <sup>13</sup>C NMR HSQC 12e**

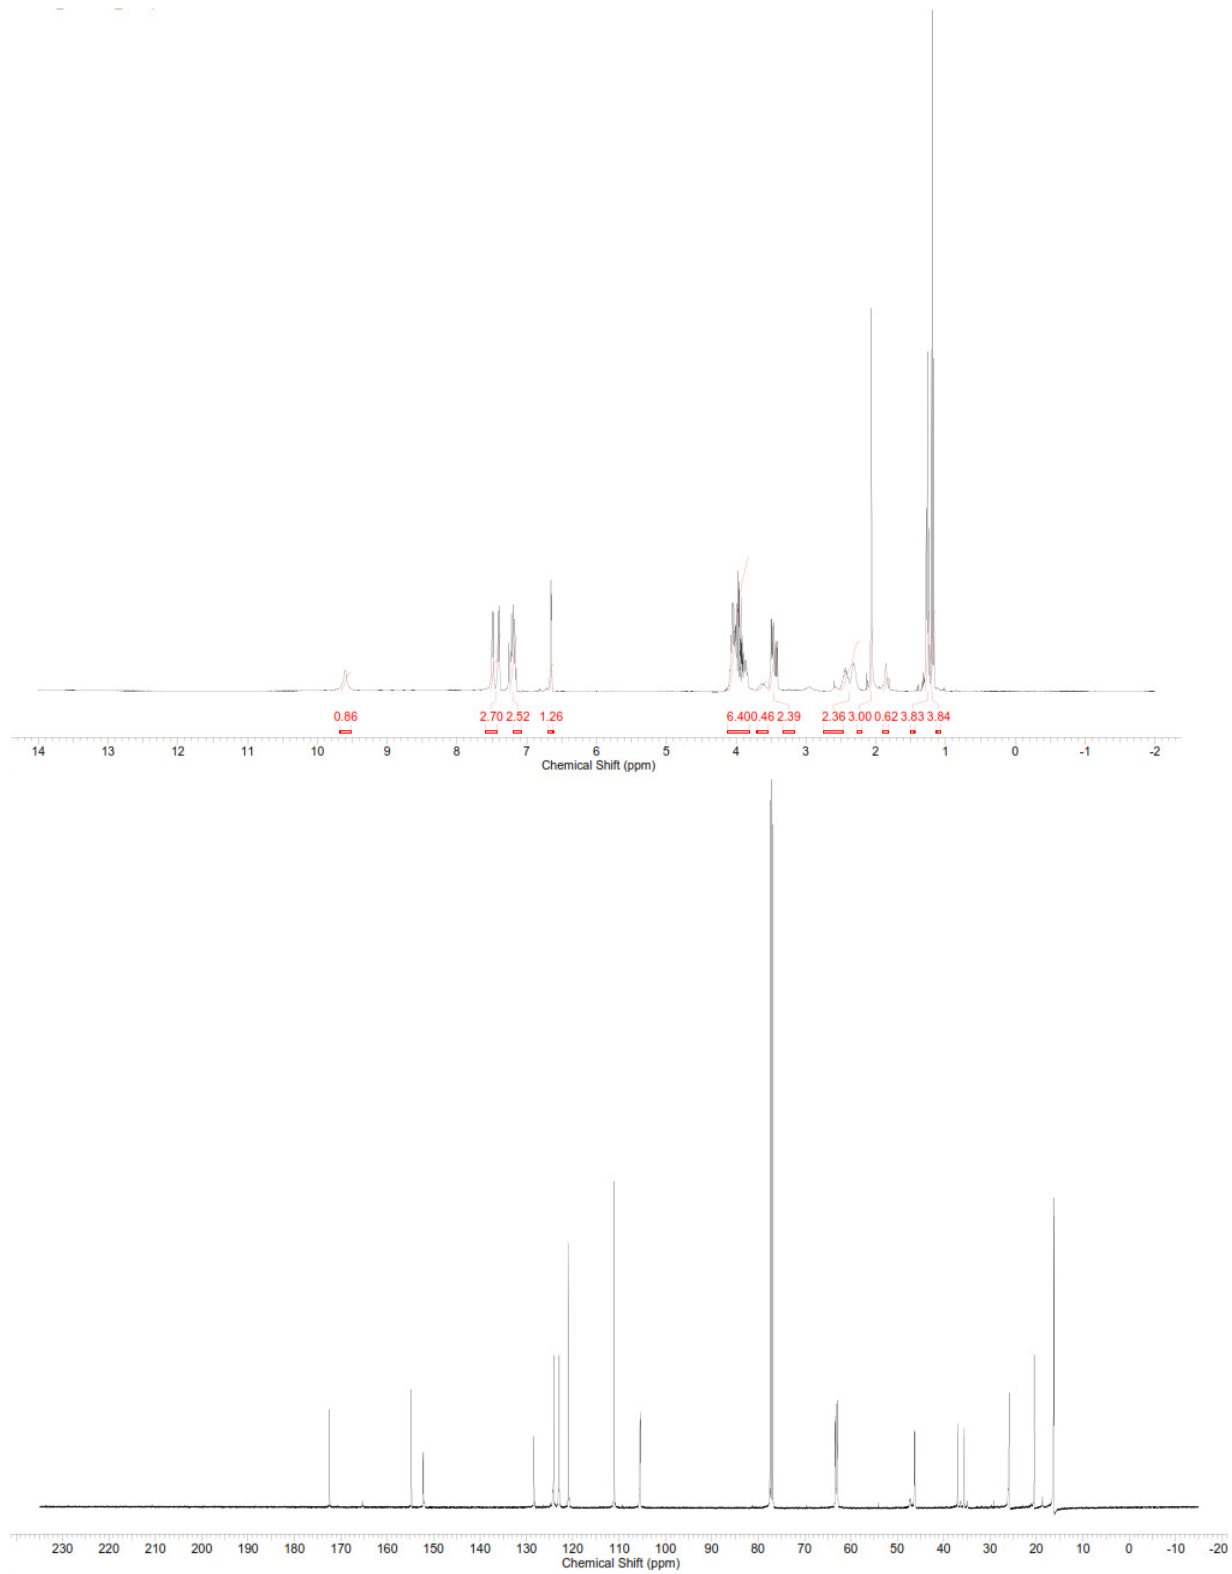

AN159\_hsqc  
 Automation directory:  
 Sample id : tempstudy  
 Sample : AN159\_hsqc  
 Pulse Sequence: ghsqc  
 Solvent: cdcl3  
 Temp: 25.0 C / 298.1 K  
 Spine 1: 100.5526026 MHz  
 File: AN159\_hsqc\_ghsqc\_01  
 INOVA-500 "processor"  
 Relax. delay: 1.000 sec  
 Acq. time: 0.150 sec  
 Width: 6398.0 Hz  
 ZD Width: 17094.0 Hz  
 ZD Offset: 100.5526026 MHz  
 2 x 128 increments  
 OBSERVE: H1, 399.8607349 MHz  
 DECOUPLE: C13, 100.5526026 MHz  
 Power: 47 db  
 on during acquisition  
 on during acquisition  
 GARP-1 modulated  
 DATA PROCESSING  
 Gauss apodization: 0.069 sec  
 F1 DATA PROCESSING  
 Gauss apodization: 0.014 sec  
 F2 apodization: 0.014 sec  
 Total time: 23 min, 15 sec

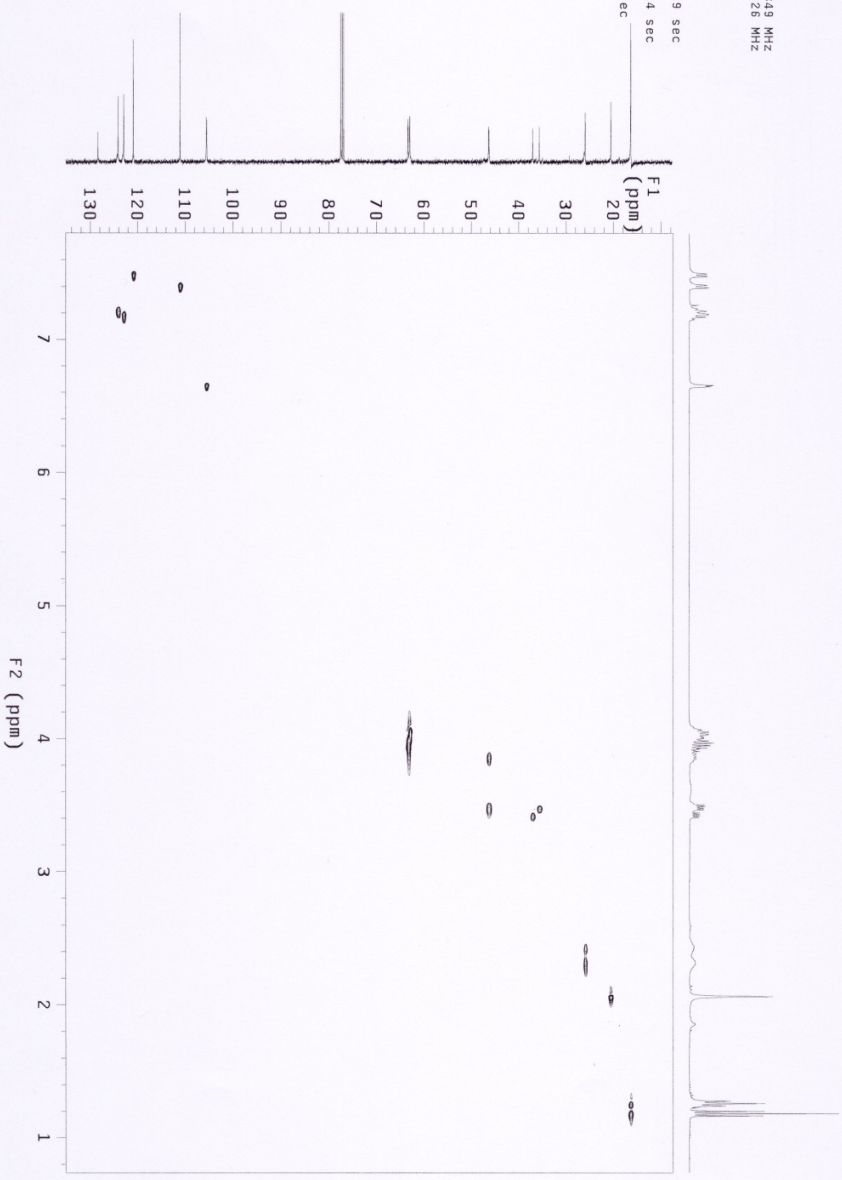



AN159\_hsqc  
Automation directory:  
Sample id: tempstudy  
Sample : AN159\_hsqc  
Pulse Sequence: ghsoc  
Solvent: cdcl3  
Temp: 25.0 C / 298.1 K  
Sample #39, Operator: annett  
File: AN159\_hsqc\_GHSQC\_01  
INOVA-500 "processor"  
Relax. delay 1.000 sec  
Acq. time 0.150 sec  
Width 6398.0 Hz  
D 20.0000000 Hz  
4 repetitions  
2 x 128 increments  
OBSERVE H1, 399.8607349 MHz  
DECUPLE C13, 100.5526026 MHz  
Power 47 db  
on during acquisition  
off during delay  
GAP-1000000  
DATA PROCESSING  
Gauss apodization 0.069 sec  
F1 DATA PROCESSING 0.014 sec  
Gauss apodization 0.014 sec  
F1 size 2048 x 4096  
Total time 29 min, 15 sec

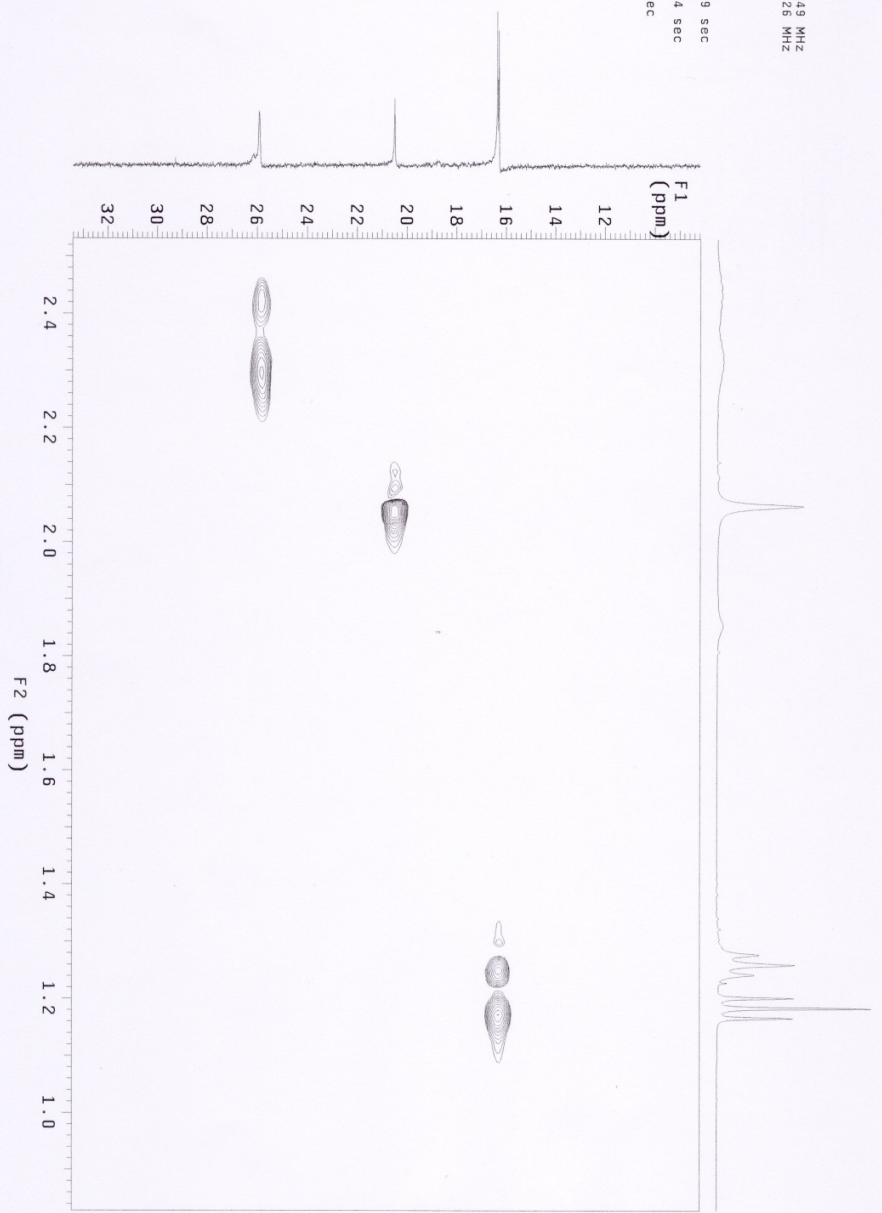

# $^1\text{H}$ NMR and $^{13}\text{C}$ NMR 12f

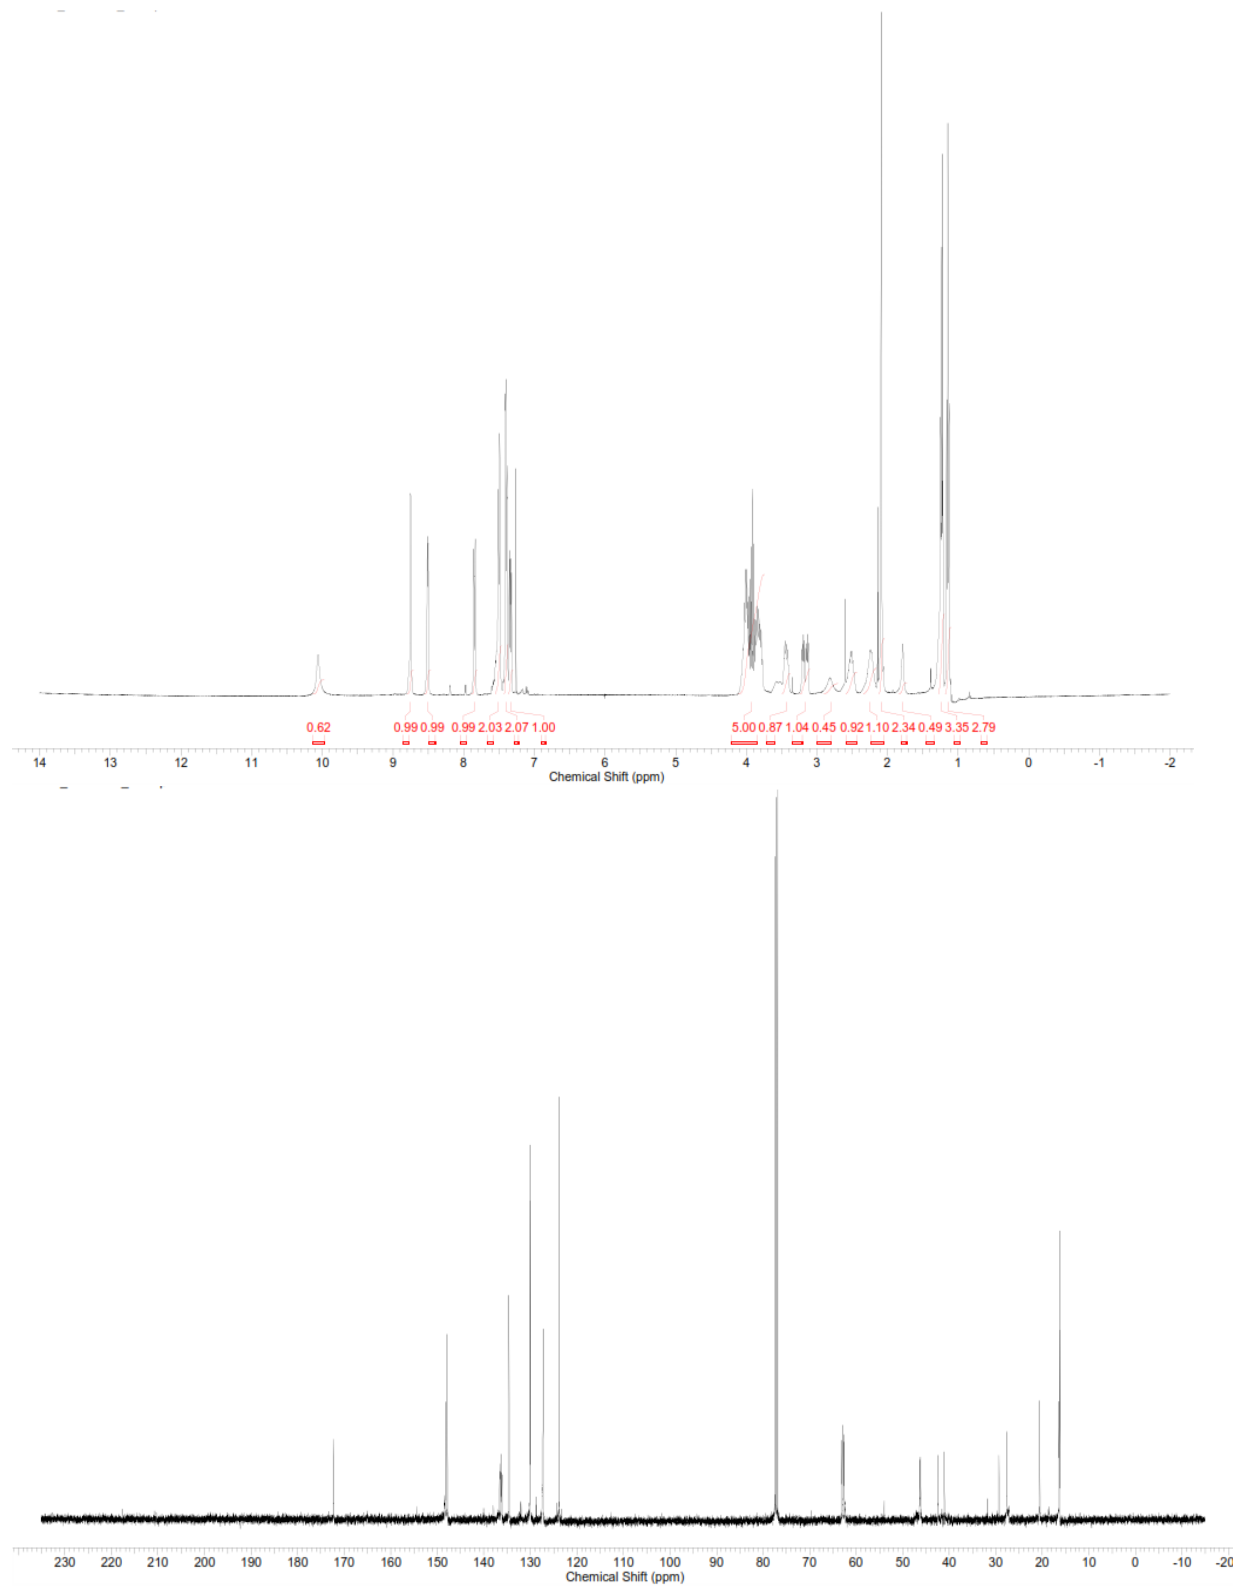

# $^1\text{H}$ NMR and $^{13}\text{C}$ NMR 12g

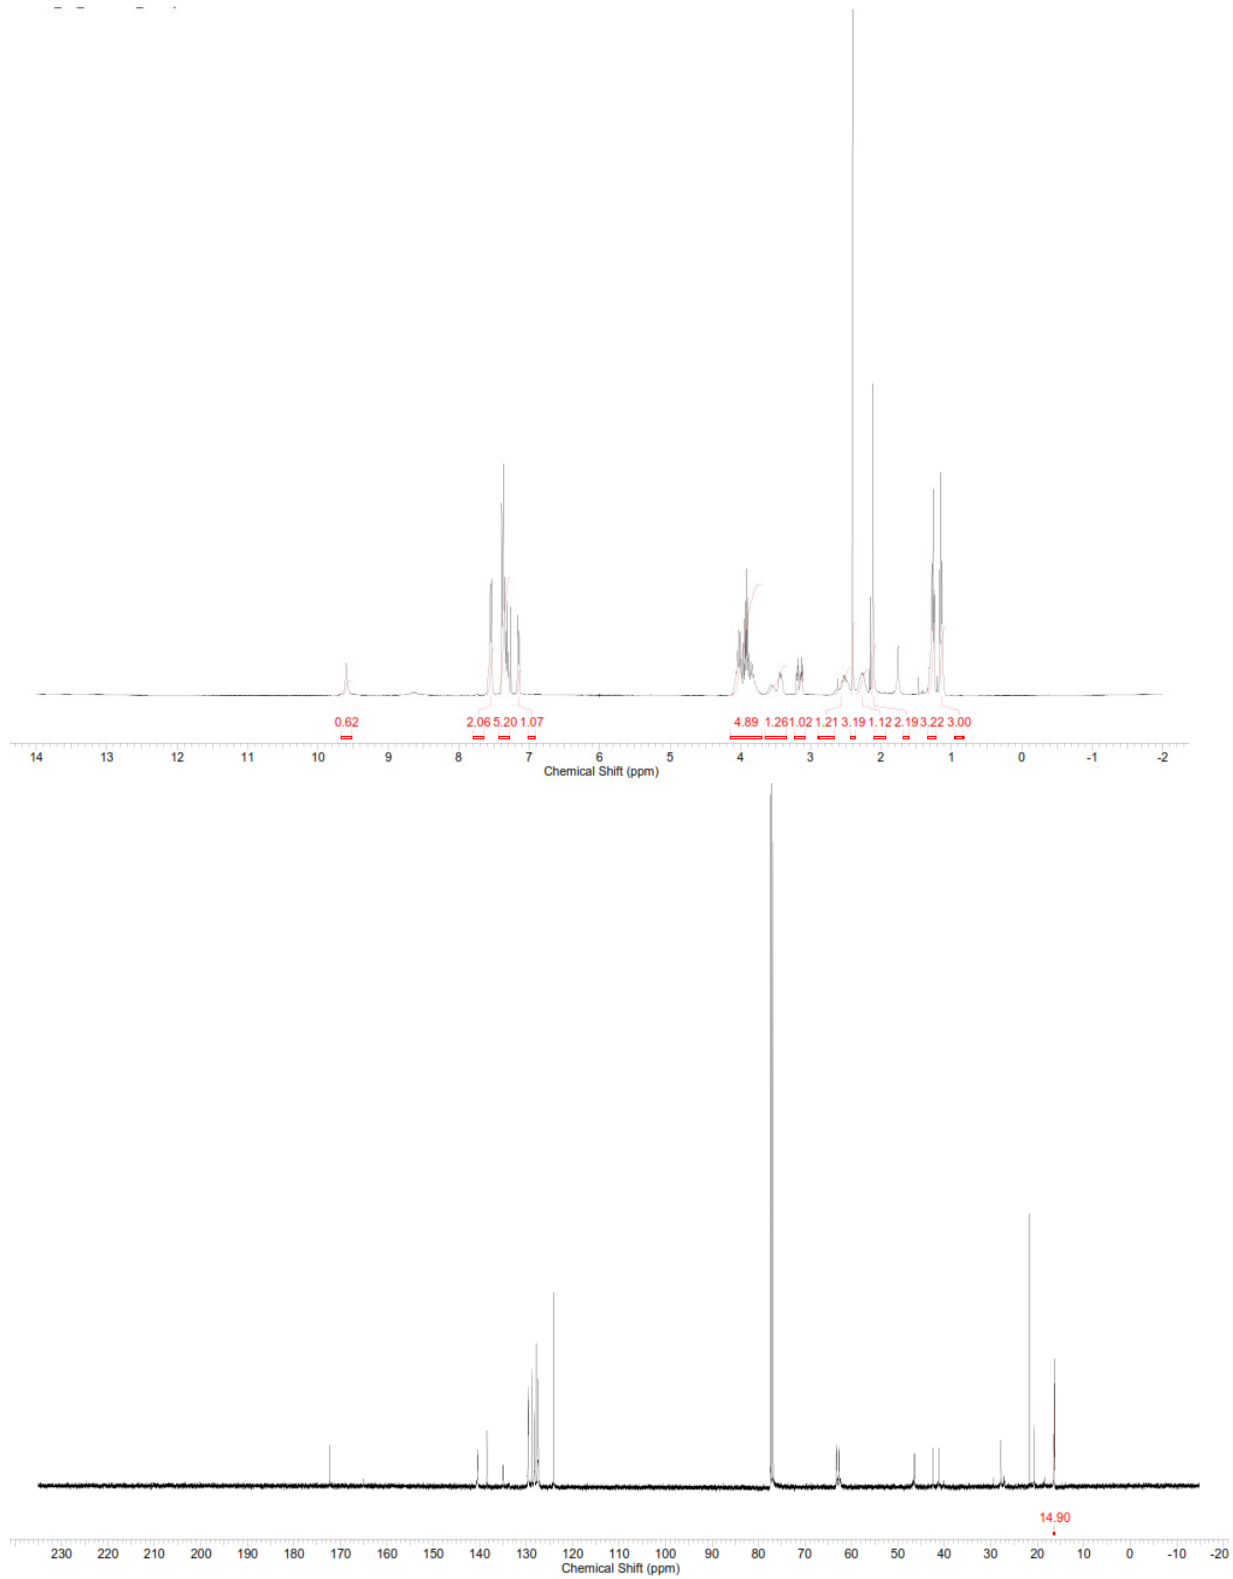

# $^1\text{H}$ NMR and $^{13}\text{C}$ NMR 12h

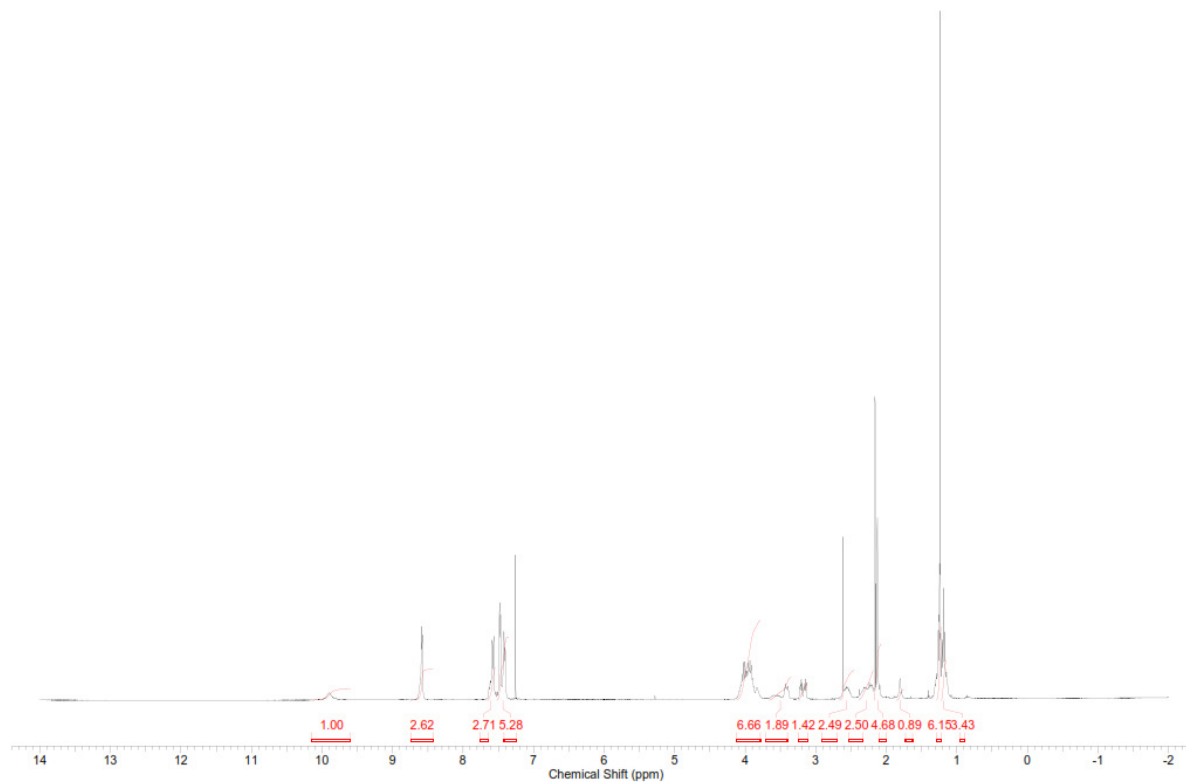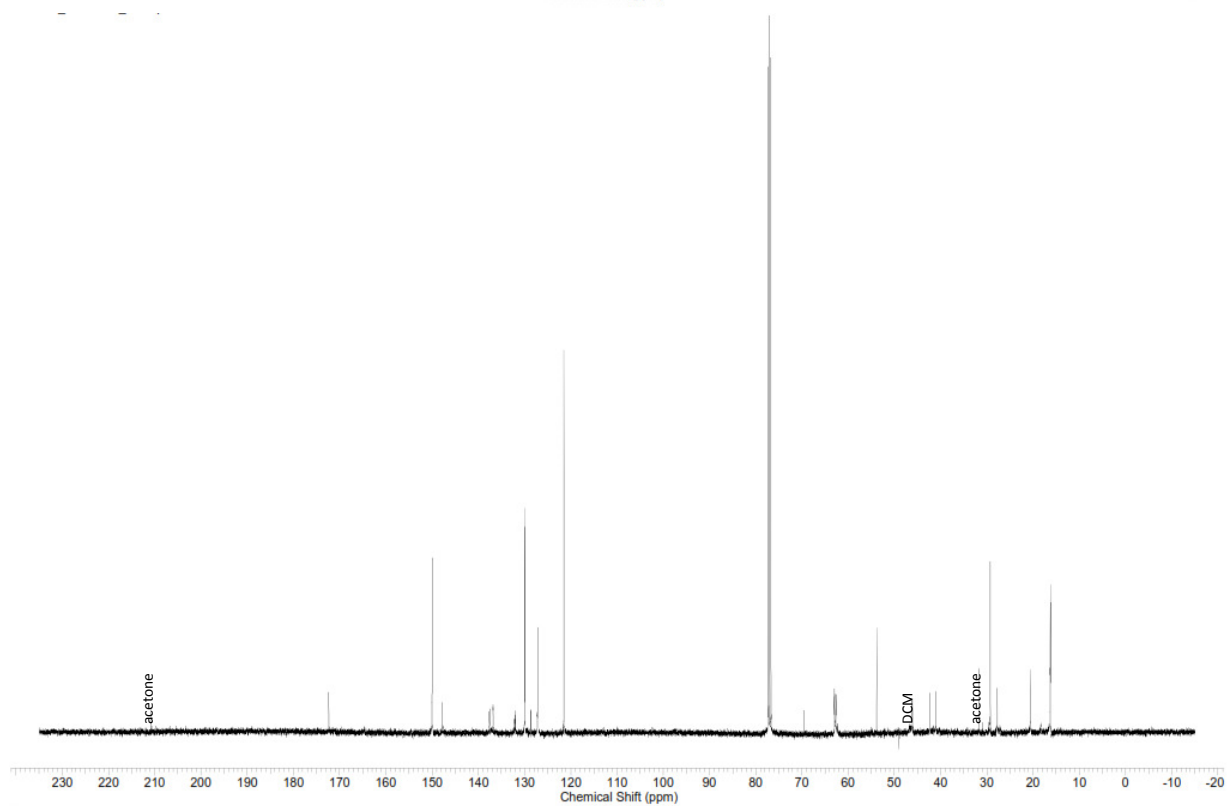

# $^1\text{H}$ NMR and $^{13}\text{C}$ NMR 12i

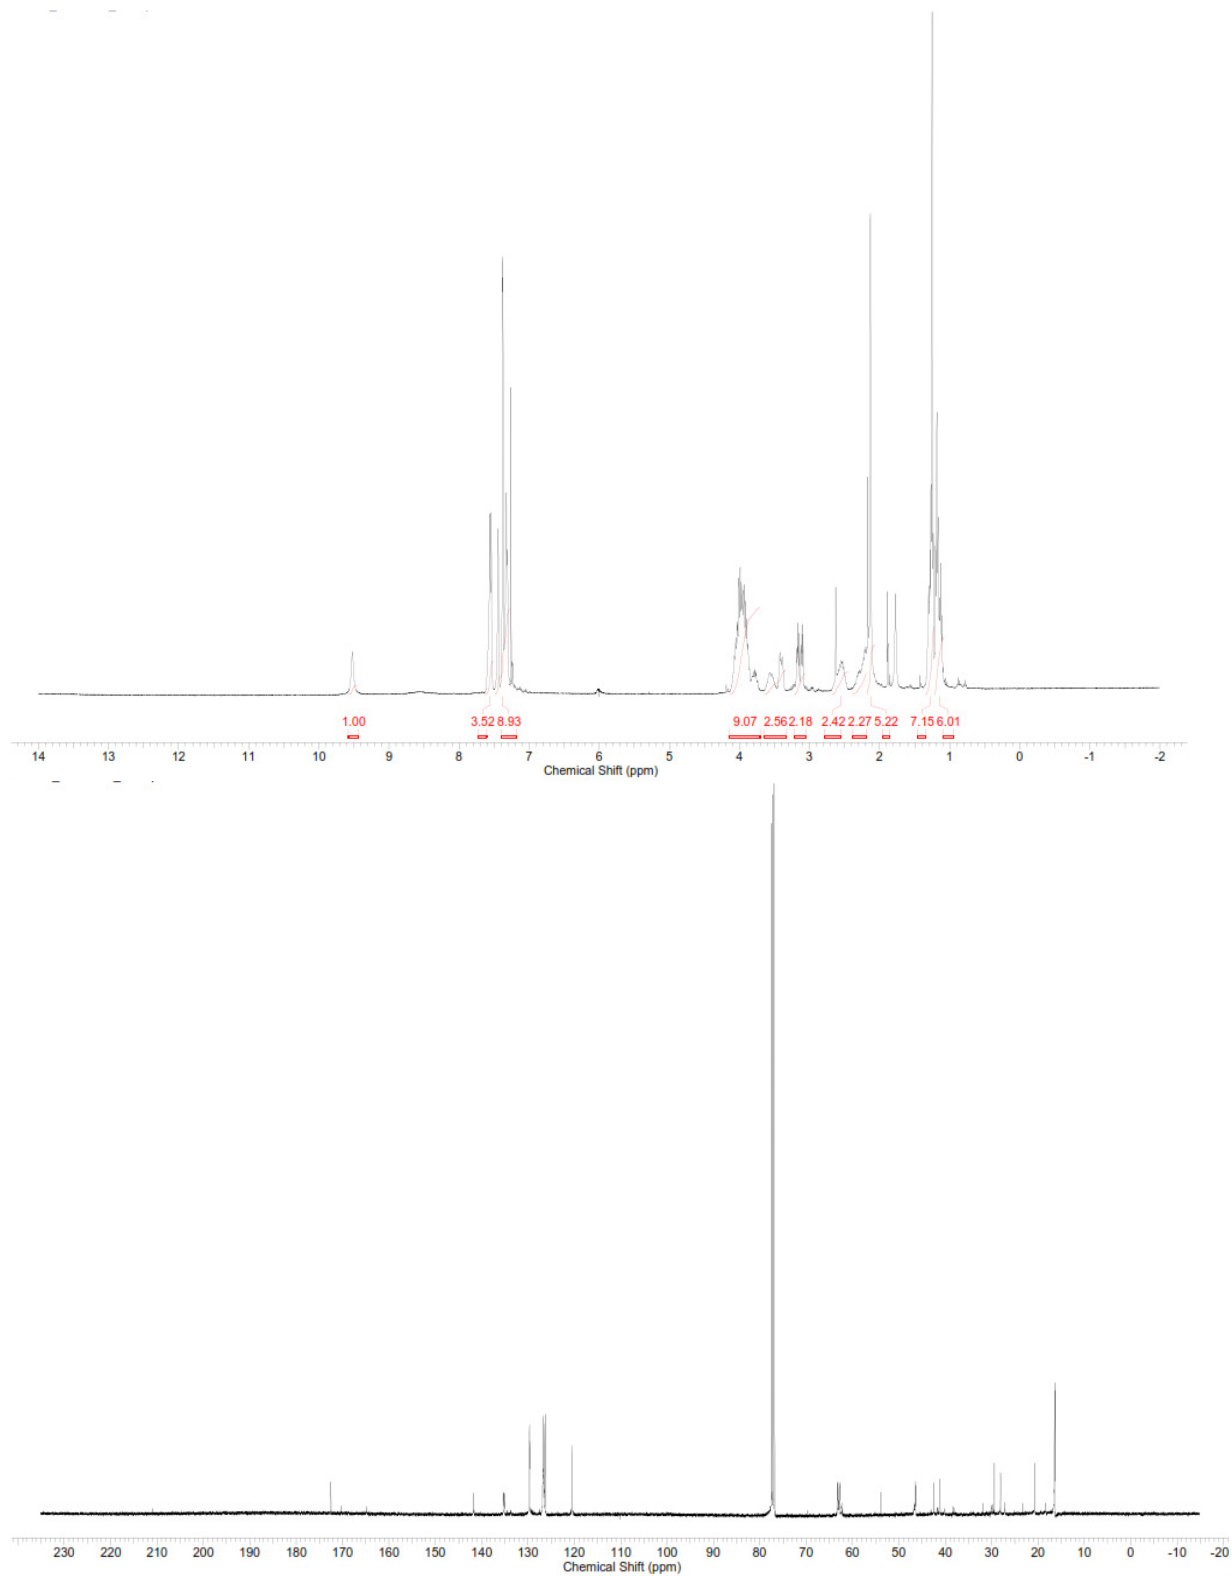

# $^1\text{H}$ NMR and $^{13}\text{C}$ NMR 12j

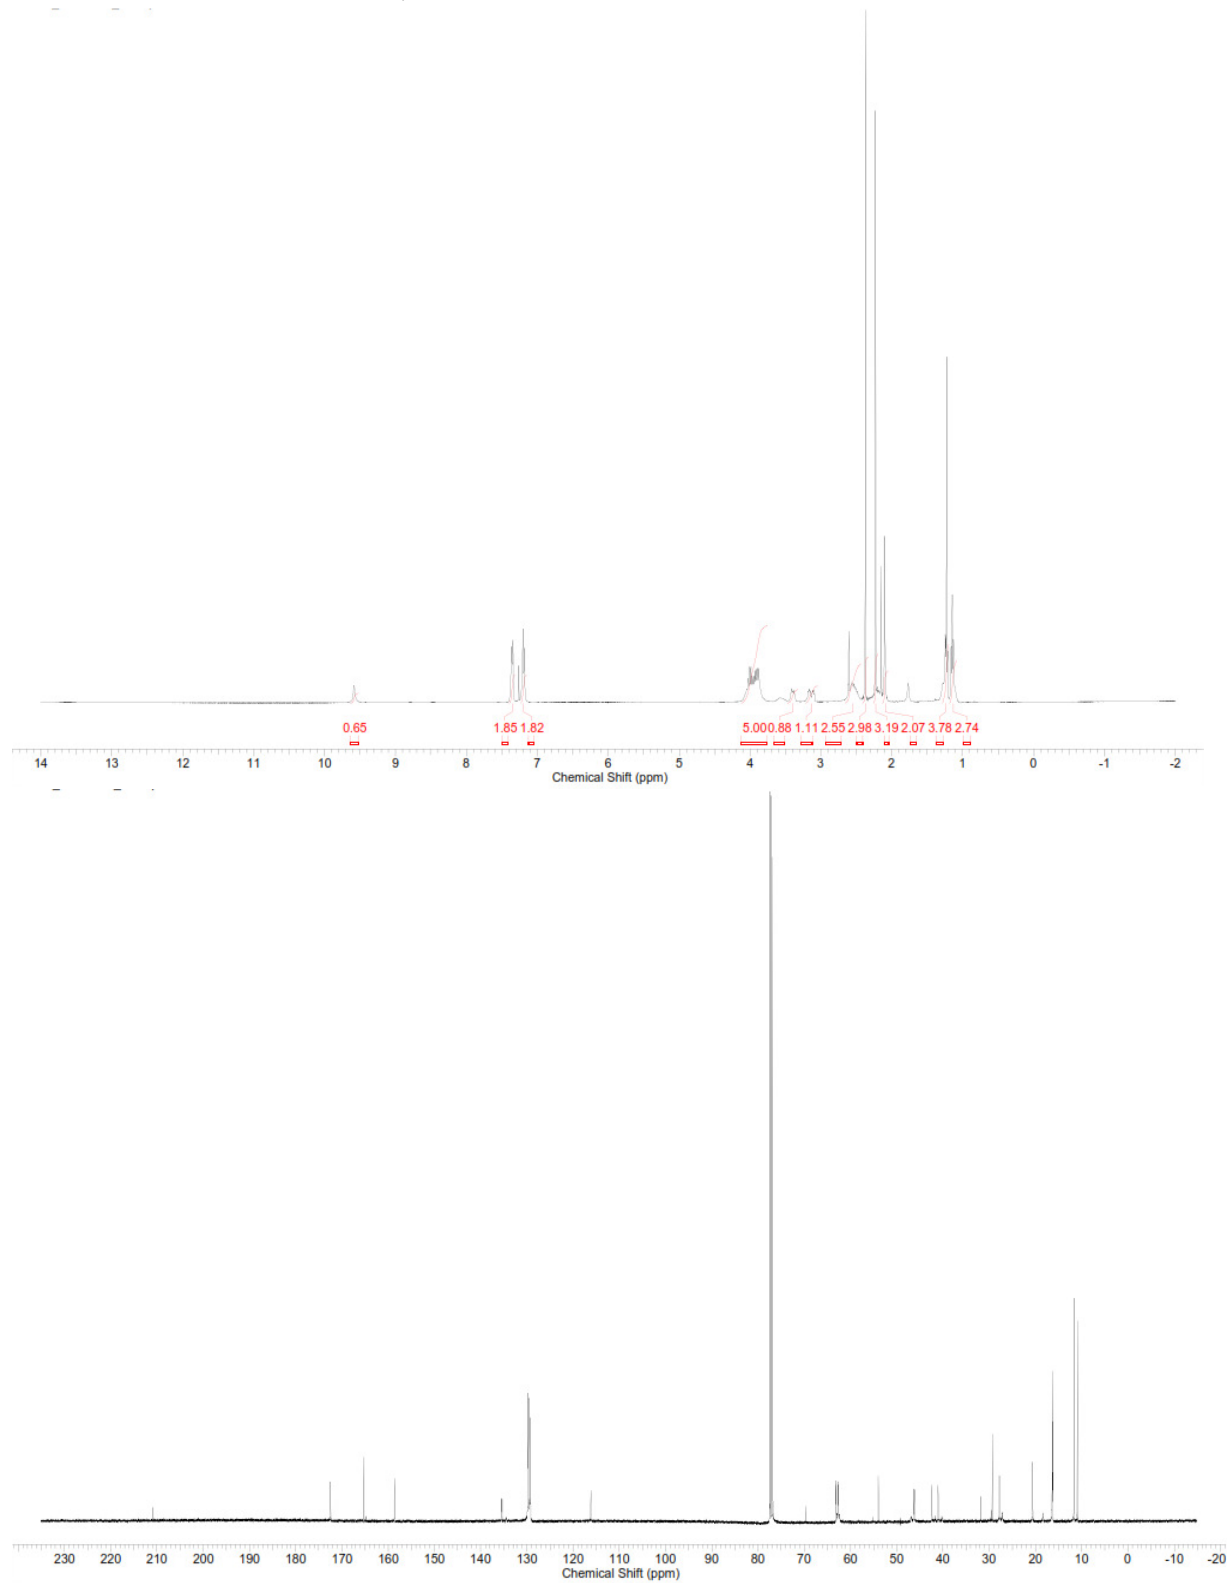

# $^1\text{H}$ NMR and $^{13}\text{C}$ NMR 12k

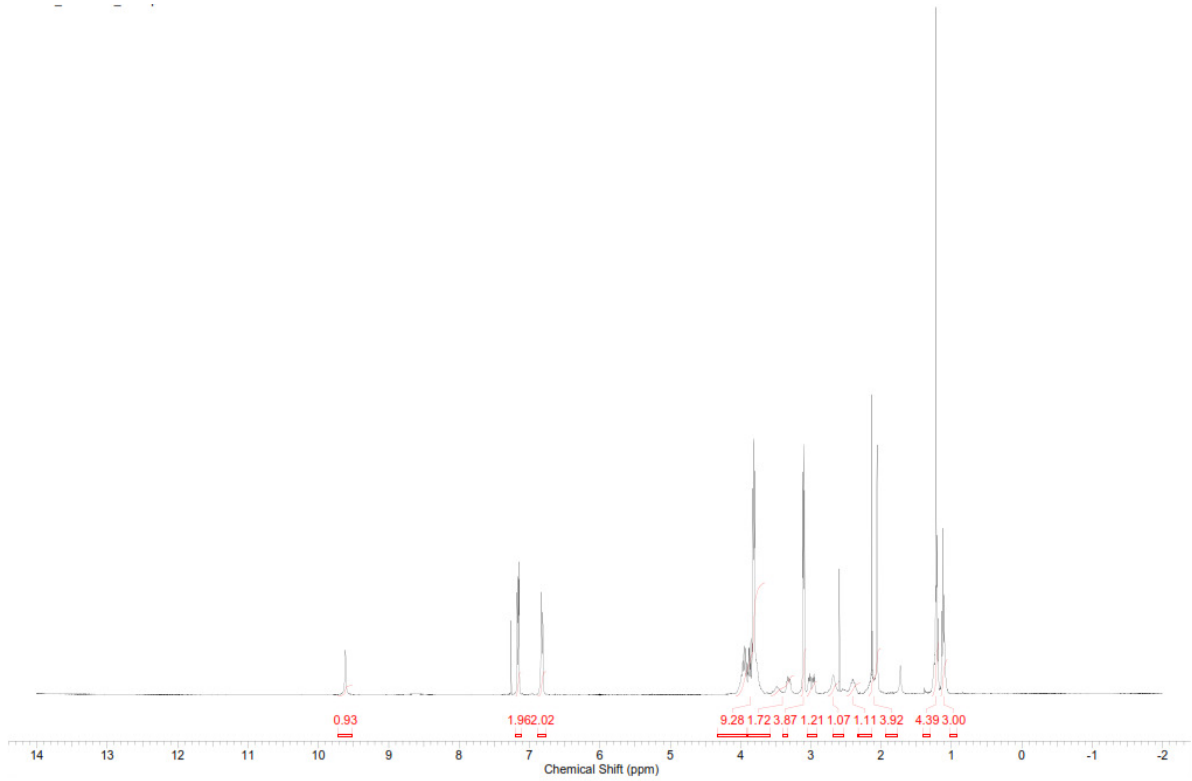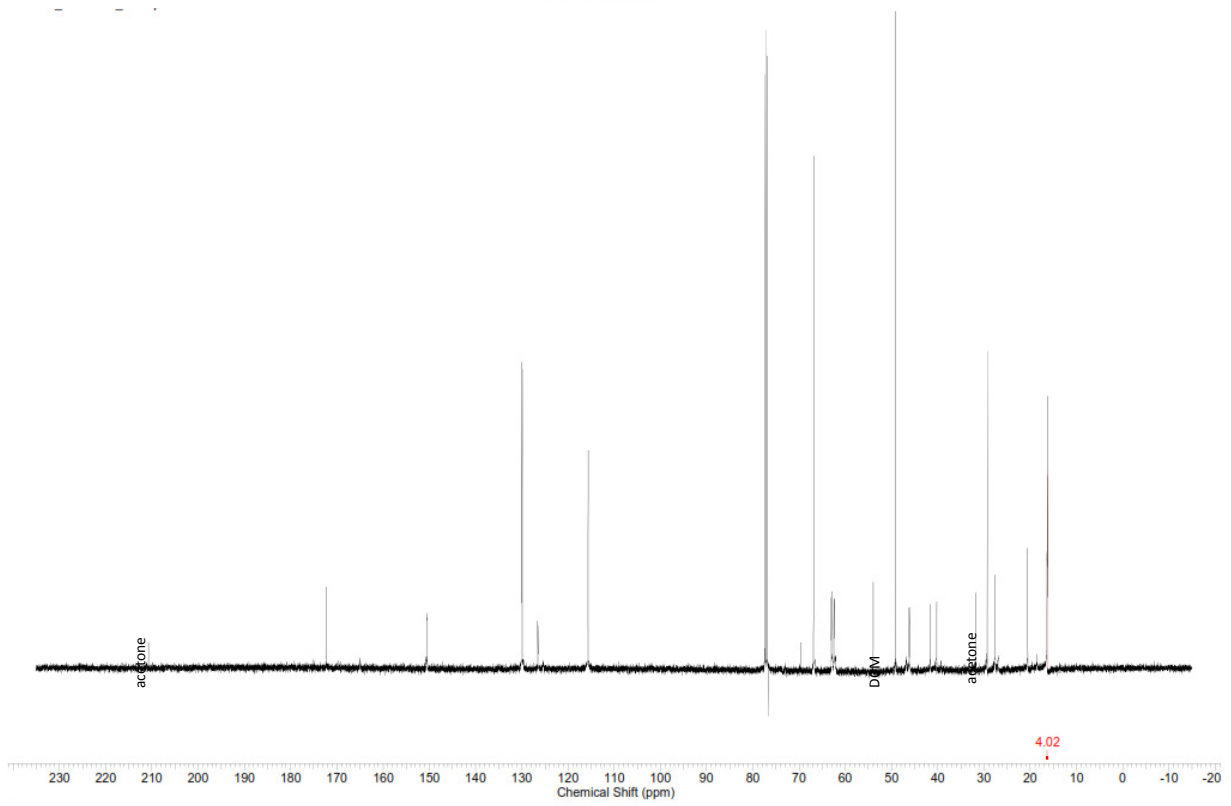

# $^1\text{H}$ NMR and $^{13}\text{C}$ NMR 13a

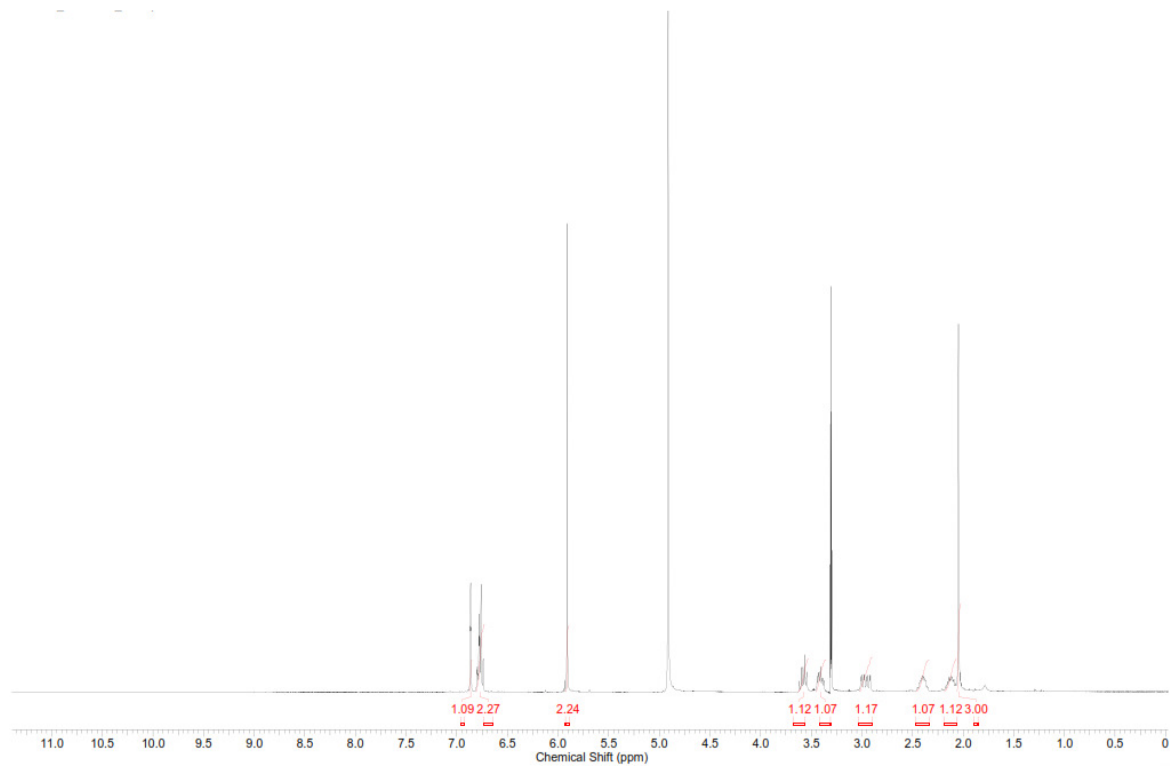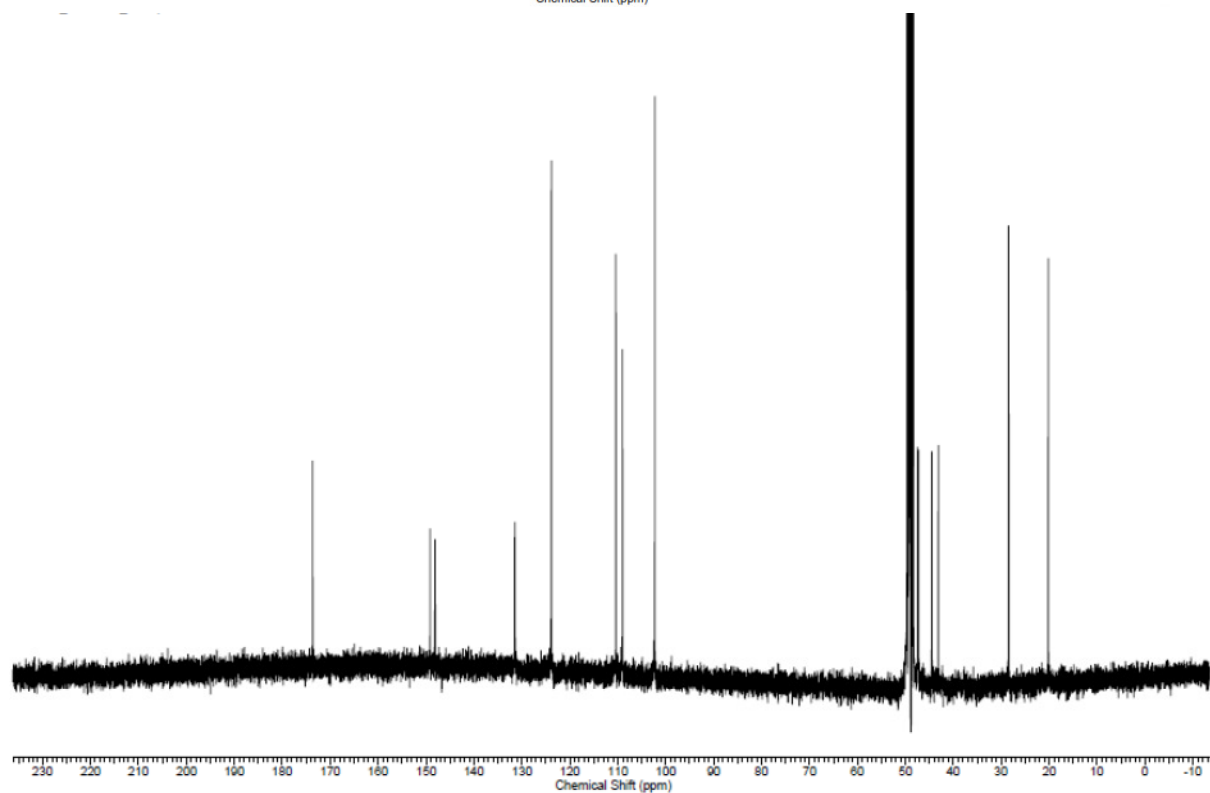



# HPLC-MS 13a

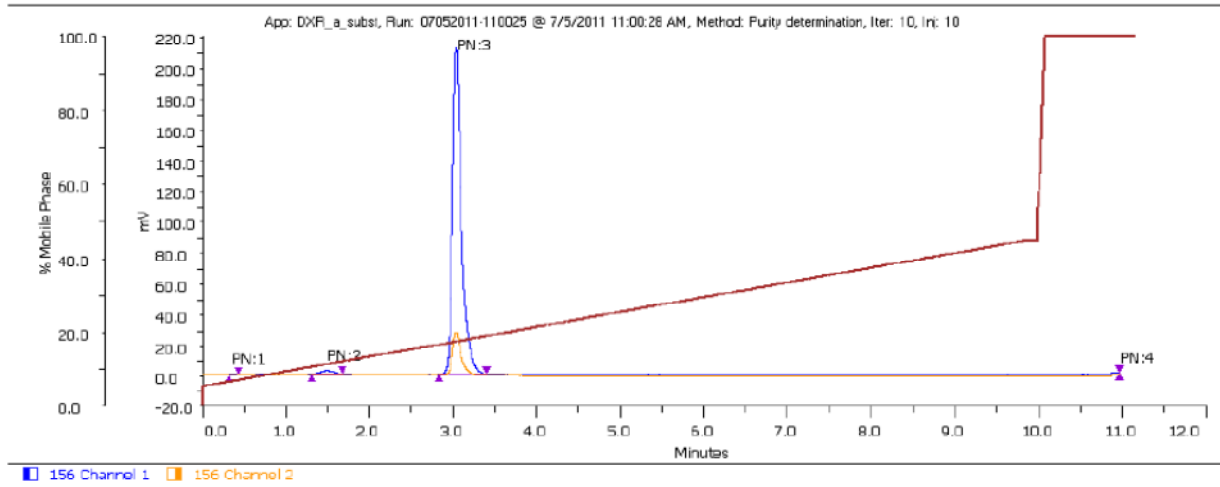

| Injection Number | Peak Name | Retention Time (min) | Area (uVmin x100) | Area % | Sample Name | Sample Location  | Fraction Site(s) |
|------------------|-----------|----------------------|-------------------|--------|-------------|------------------|------------------|
| 10               | 1         | 0.398                | 4510.8333         | 0.168  | AN150_b     | Sample Zone-->10 |                  |
| 10               | 2         | 1.483                | 40808.3333        | 1.523  | AN150_b     | Sample Zone-->10 |                  |
| 10               | 3         | 3.038                | 2633778.3333      | 98.308 | AN150_b     | Sample Zone-->10 |                  |
| 10               | 4         | 10.963               | 1.6667            | 0      | AN150_b     | Sample Zone-->10 |                  |

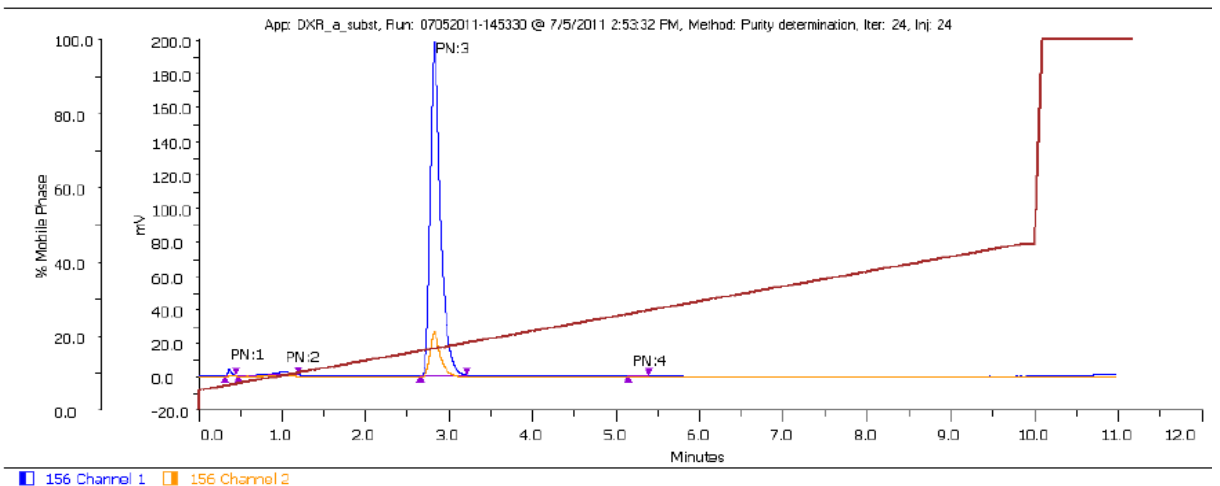

| Injection Number | Peak Name | Retention Time (min) | Area (uVmin x100) | Area % | Sample Name | Sample Location  | Fraction Site(s) |
|------------------|-----------|----------------------|-------------------|--------|-------------|------------------|------------------|
| 24               | 1         | 0.368                | 15516.6667        | 0.54   | AN150_C18   | Sample Zone-->11 |                  |
| 24               | 2         | 1.027                | 53141.25          | 1.851  | AN150_C18   | Sample Zone-->11 |                  |
| 24               | 3         | 2.828                | 2799876.6667      | 97.52  | AN150_C18   | Sample Zone-->11 |                  |
| 24               | 4         | 5.192                | 2535              | 0.088  | AN150_C18   | Sample Zone-->11 |                  |

# $^1\text{H}$ NMR and $^{13}\text{C}$ NMR 13b

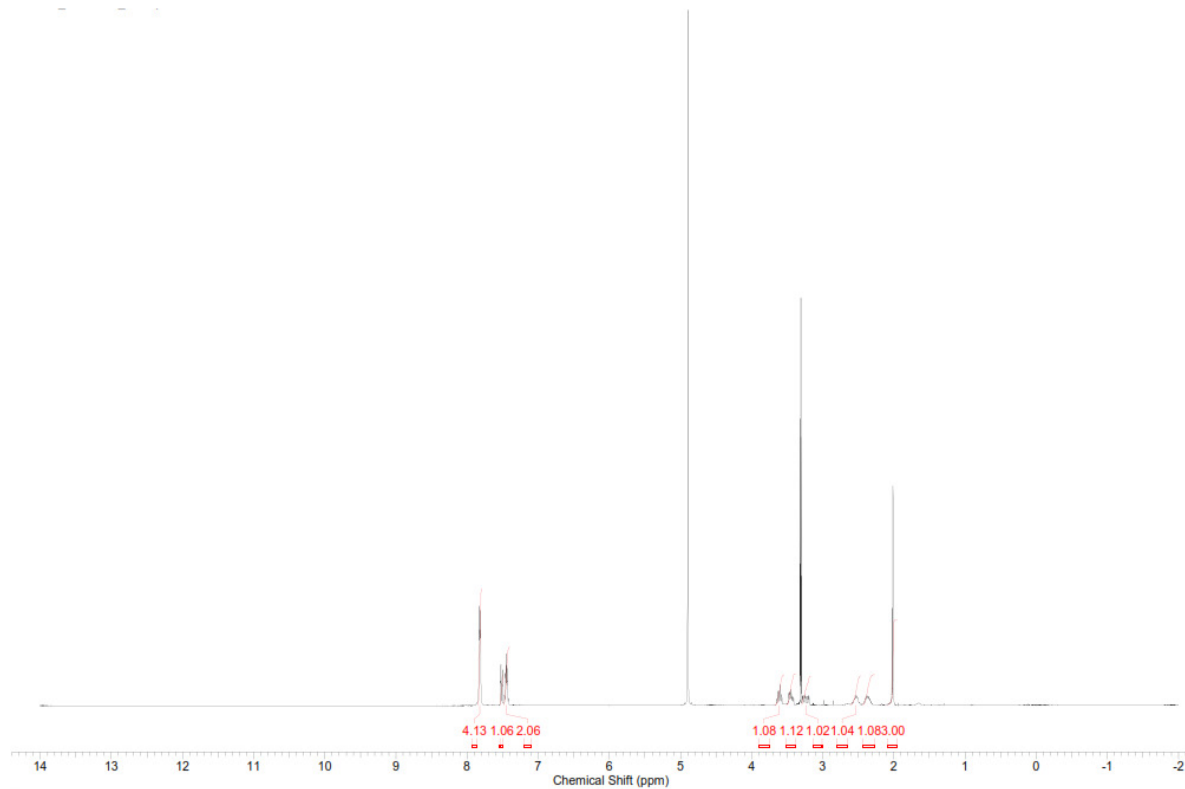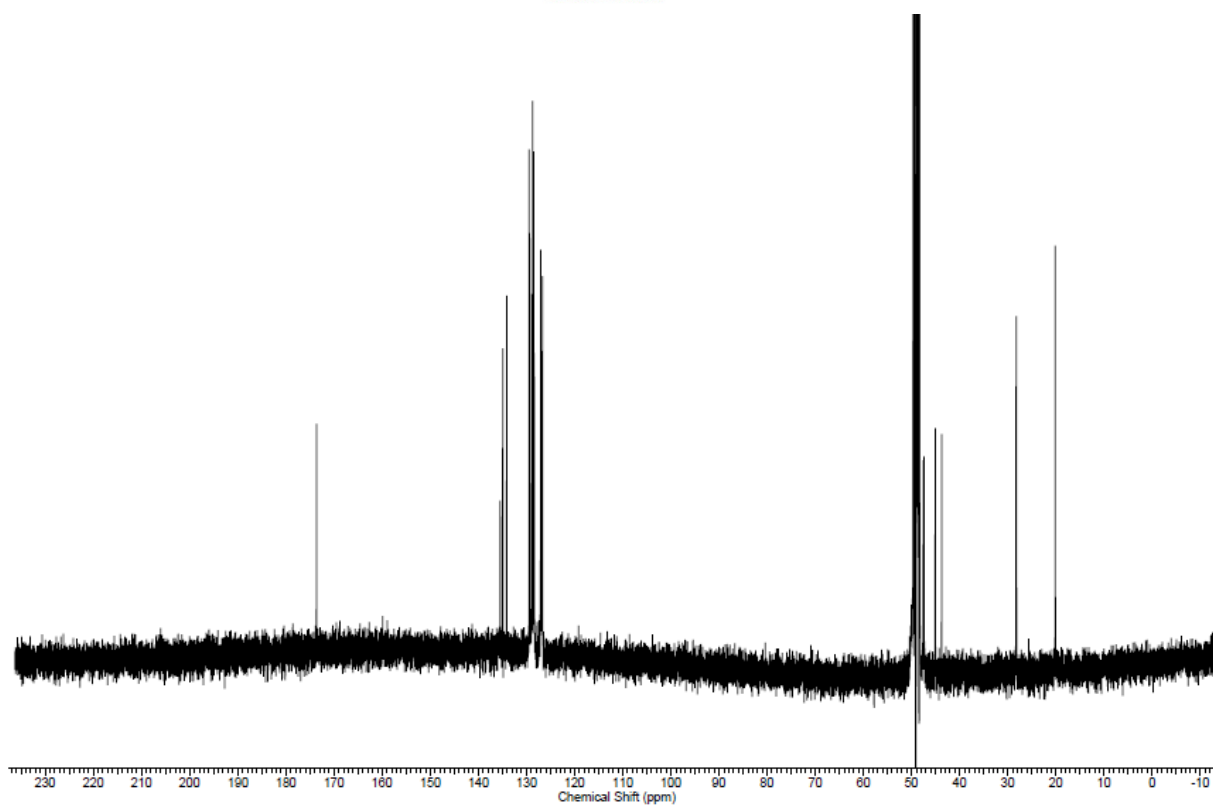

# HPLC-MS 13b

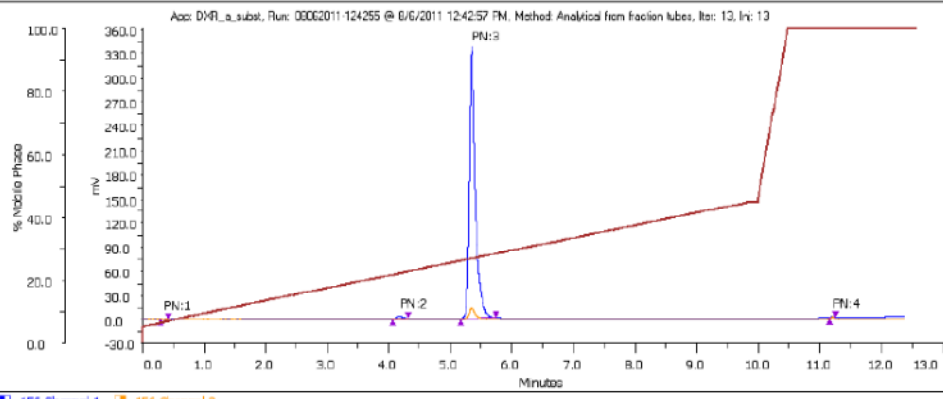

156 Channel 1 156 Channel 2

Sample Table

| Injection Number | Peak Name | Retention Time (min) | Area (uVmin x100) | Area % | Sample Name | Sample Location  | Fraction Site(s) |
|------------------|-----------|----------------------|-------------------|--------|-------------|------------------|------------------|
| 13               | 1         | 0.349                | 6932.5            | 0.181  | AN149_B     | Fraction Zone->2 |                  |
| 13               | 2         | 4.171                | 25193.3333        | 0.656  | AN149_B     | Fraction Zone->2 |                  |
| 13               | 3         | 5.352                | 3802125.8333      | 99.054 | AN149_B     | Fraction Zone->2 |                  |
| 13               | 4         | 11.214               | 4179.5833         | 0.109  | AN149_B     | Fraction Zone->2 |                  |

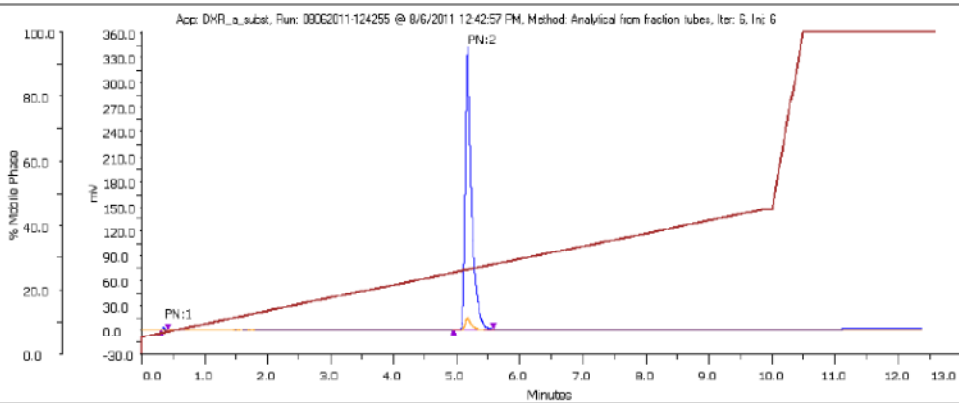

156 Channel 1 156 Channel 2

Sample Table

| Injection Number | Peak Name | Retention Time (min) | Area (uVmin x100) | Area % | Sample Name | Sample Location  | Fraction Site(s) |
|------------------|-----------|----------------------|-------------------|--------|-------------|------------------|------------------|
| 6                | 1         | 0.353                | 8465.8333         | 0.213  | AN149       | Fraction Zone->2 |                  |
| 6                | 2         | 5.177                | 3962759.1667      | 99.787 | AN149       | Fraction Zone->2 |                  |

# $^1\text{H}$ NMR and $^{13}\text{C}$ NMR 13c

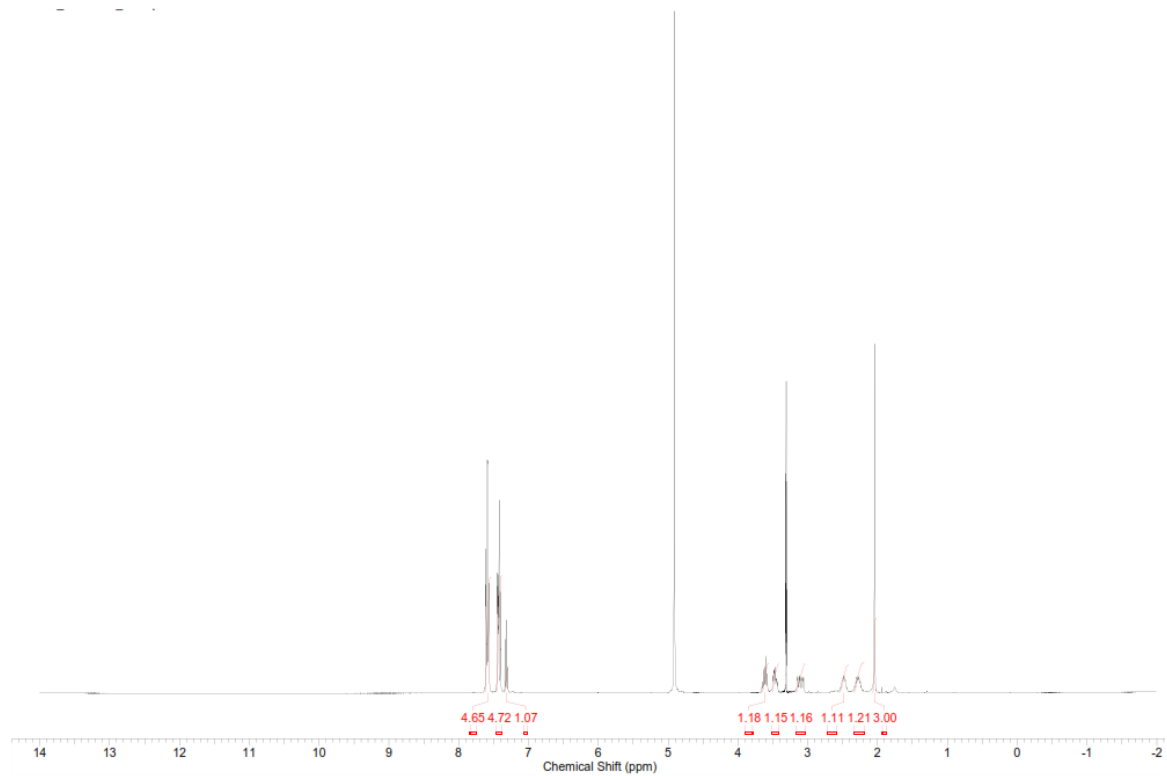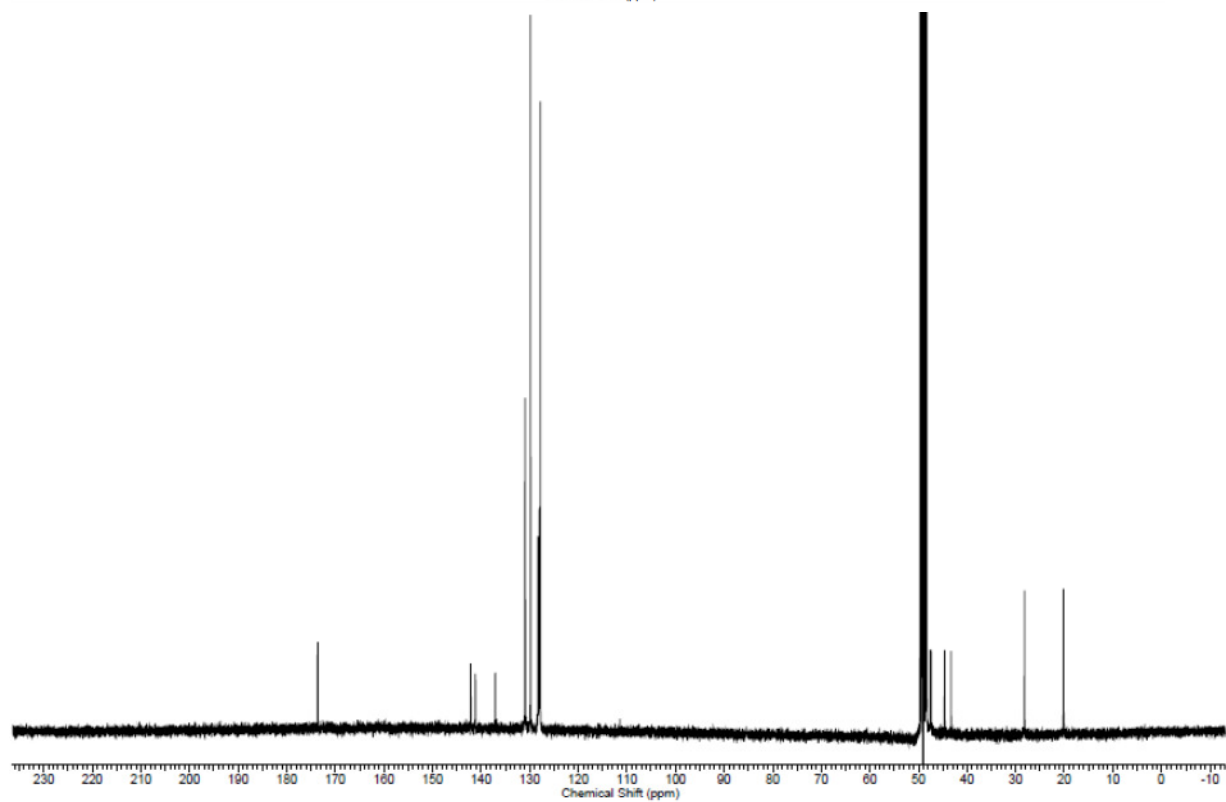

# HPLC-MS 13c

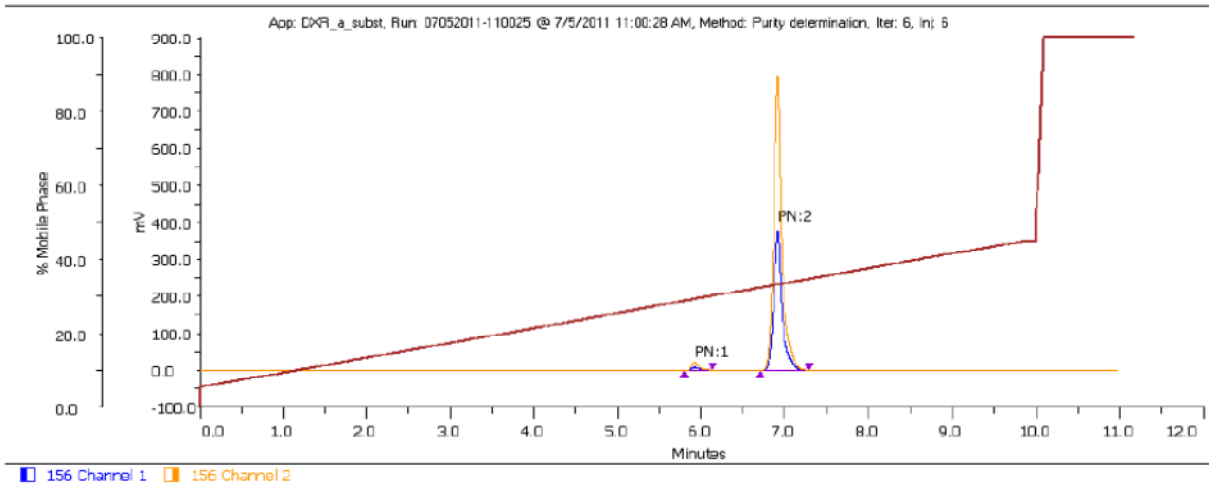

Sample Table

| Injection Number | Peak Name | Retention Time (min) | Area (uVmin x100) | Area % | Sample Name | Sample Location | Fraction Site(s) |
|------------------|-----------|----------------------|-------------------|--------|-------------|-----------------|------------------|
| 6                | 1         | 5.925                | 89540.8333        | 2.024  | AN134_b     | Sample Zone->2  |                  |
| 6                | 2         | 6.921                | 4335217.9167      | 97.976 | AN134_b     | Sample Zone->2  |                  |

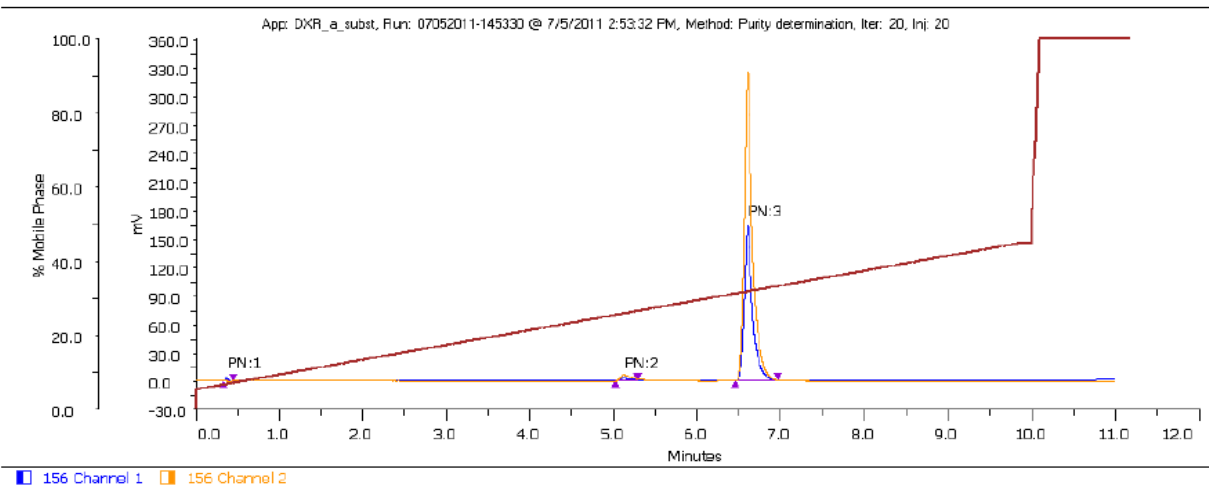

Sample Table

| Injection Number | Peak Name | Retention Time (min) | Area (uVmin x100) | Area % | Sample Name | Sample Location | Fraction Site(s) |
|------------------|-----------|----------------------|-------------------|--------|-------------|-----------------|------------------|
| 20               | 1         | 0.37                 | 9779.1667         | 0.524  | AN134_C18   | Sample Zone->3  |                  |
| 20               | 2         | 5.127                | 25957.5           | 1.391  | AN134_C18   | Sample Zone->3  |                  |
| 20               | 3         | 6.611                | 1830722.5         | 98.085 | AN134_C18   | Sample Zone->3  |                  |

# $^1\text{H}$ NMR and $^{13}\text{C}$ NMR 13d

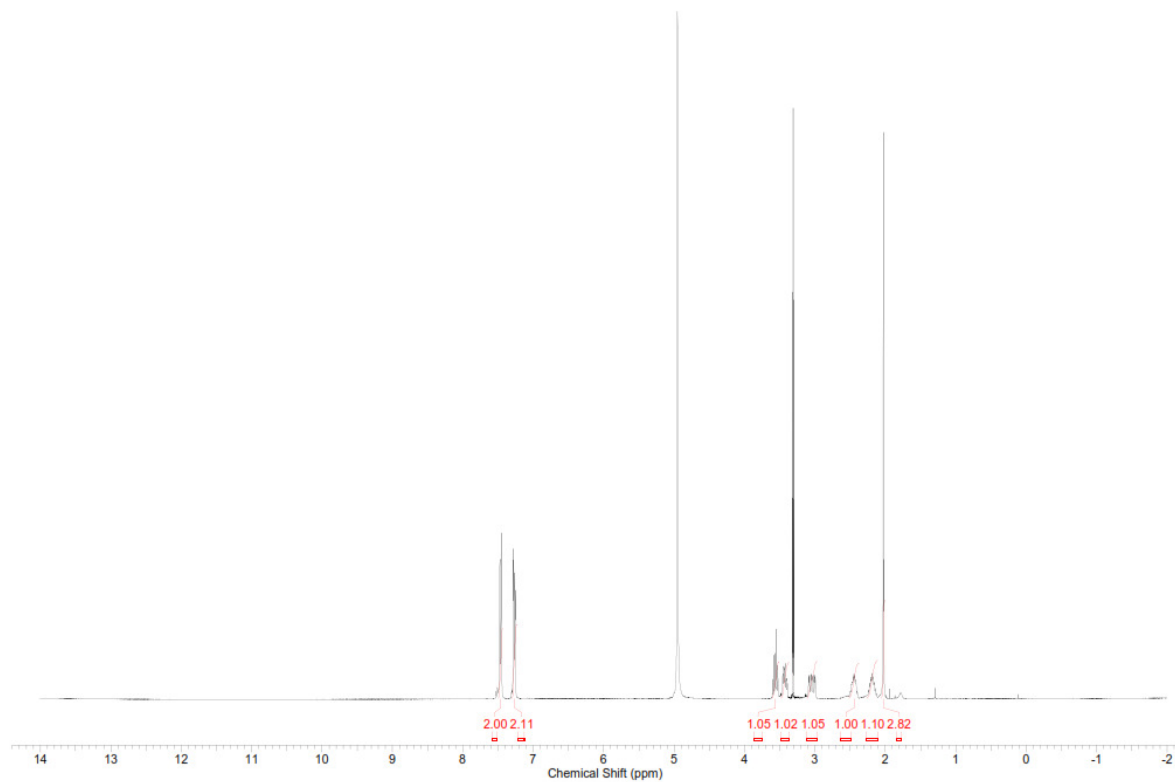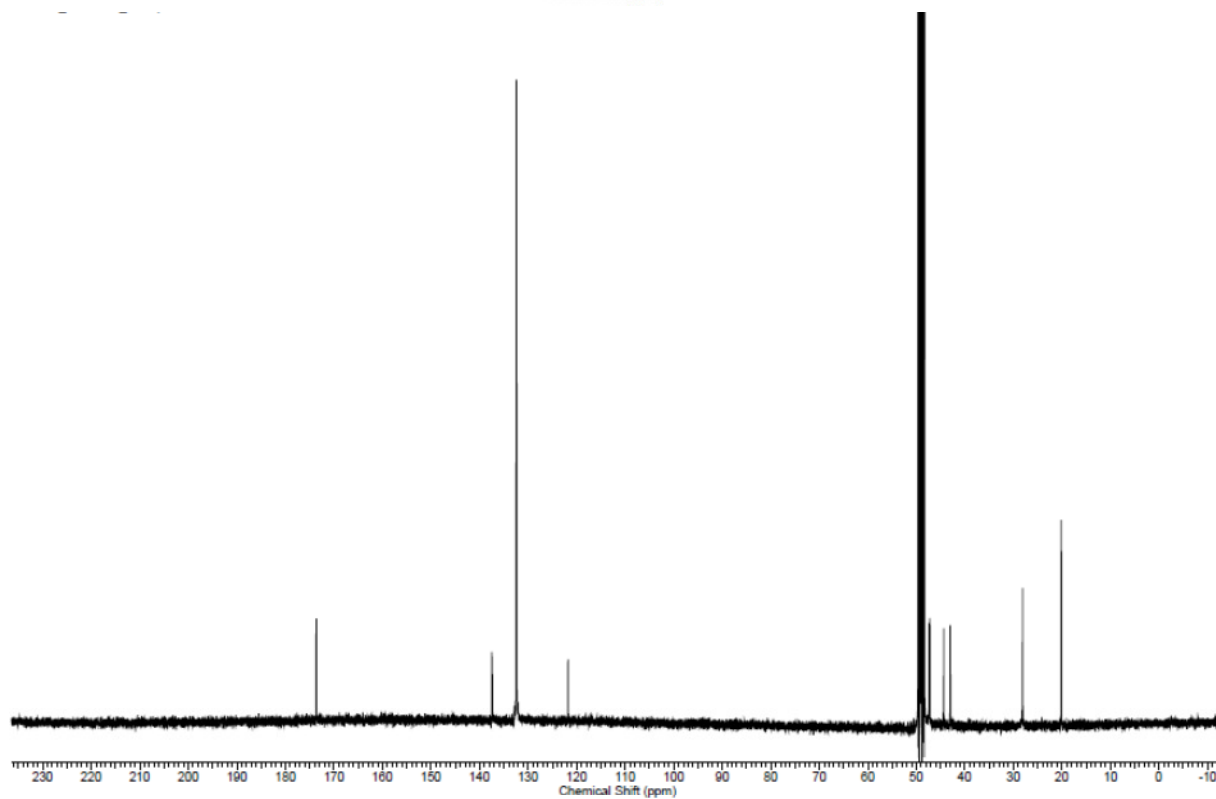

# HPLC-MS 13d

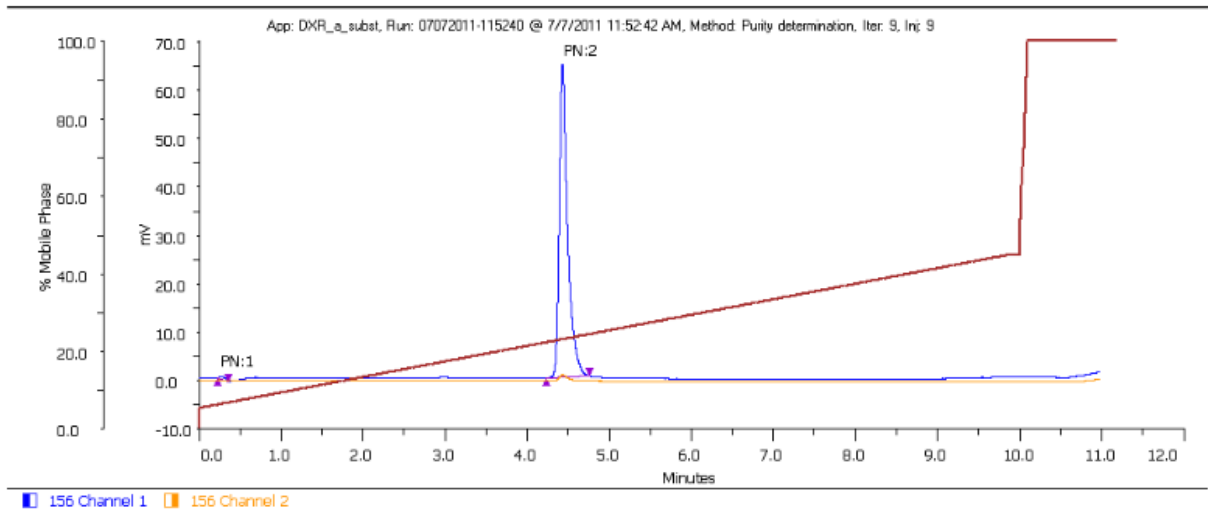

Sample Table

| Injection Number | Peak Name | Retention Time (min) | Area (uVmin x100) | Area % | Sample Name | Sample Location | Fraction Site(s) |
|------------------|-----------|----------------------|-------------------|--------|-------------|-----------------|------------------|
| 9                | 1         | 0.309                | 4522.5            | 0.591  | AN166_b     | Sample Zone->2  |                  |
| 9                | 2         | 4.436                | 760137.9167       | 99.409 | AN166_b     | Sample Zone->2  |                  |

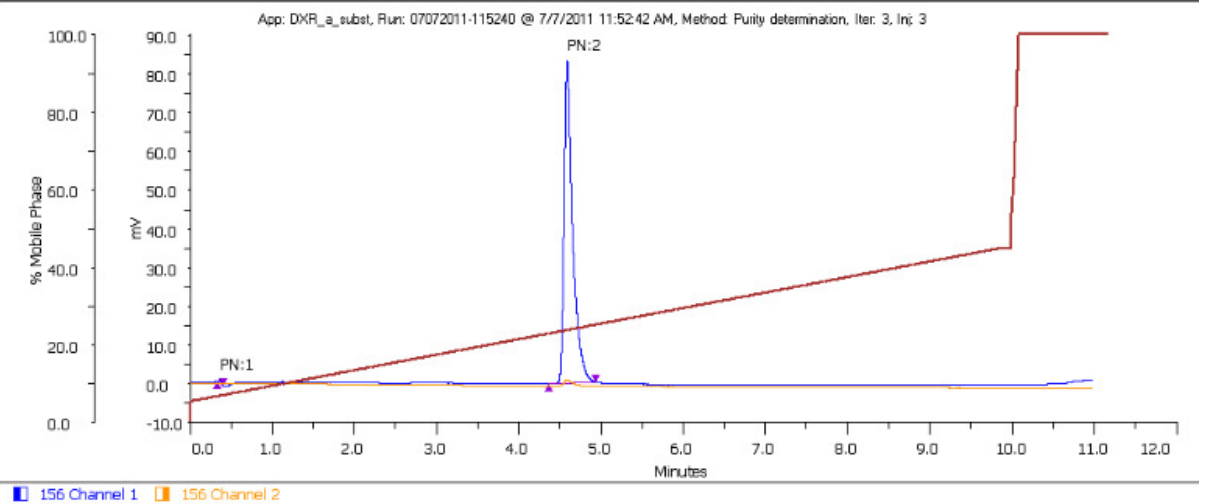

Sample Table

| Injection Number | Peak Name | Retention Time (min) | Area (uVmin x100) | Area % | Sample Name | Sample Location | Fraction Site(s) |
|------------------|-----------|----------------------|-------------------|--------|-------------|-----------------|------------------|
| 3                | 1         | 0.365                | 2530              | 0.253  | AN166_C18   | Sample Zone->2  |                  |
| 3                | 2         | 4.594                | 997845            | 99.747 | AN166_C18   | Sample Zone->2  |                  |

# $^1\text{H}$ NMR and $^{13}\text{C}$ NMR 13e

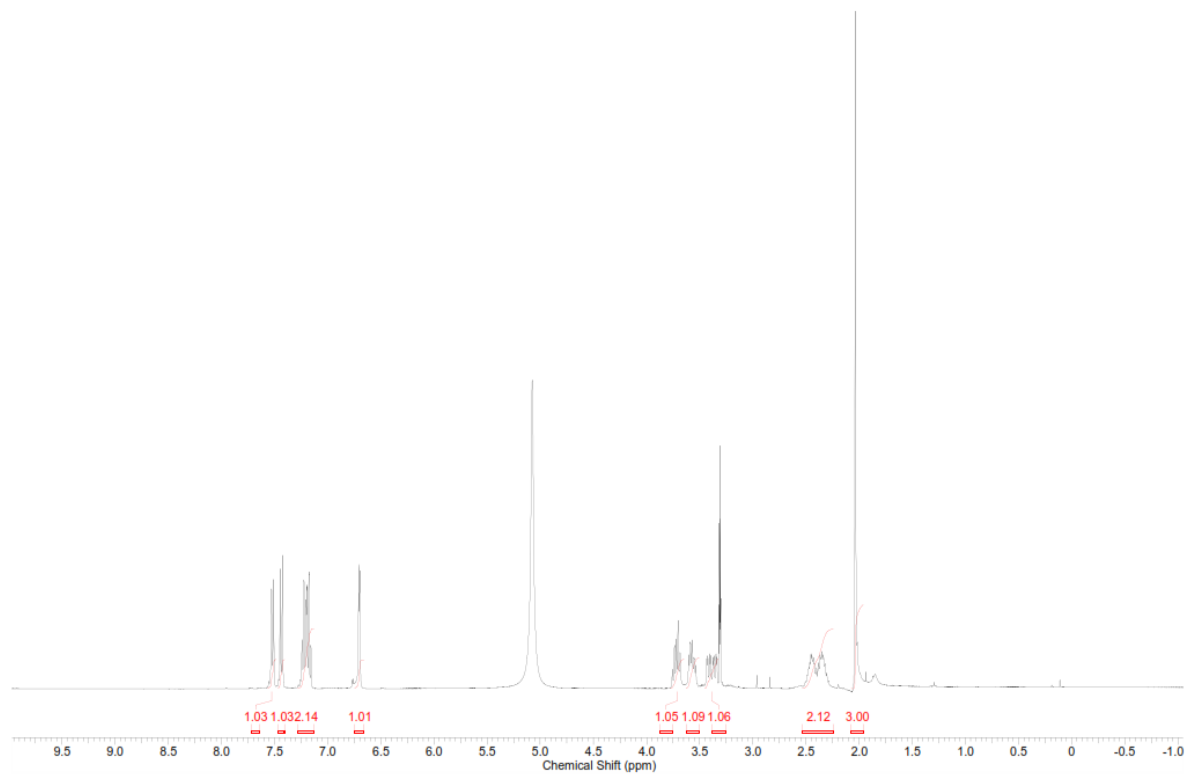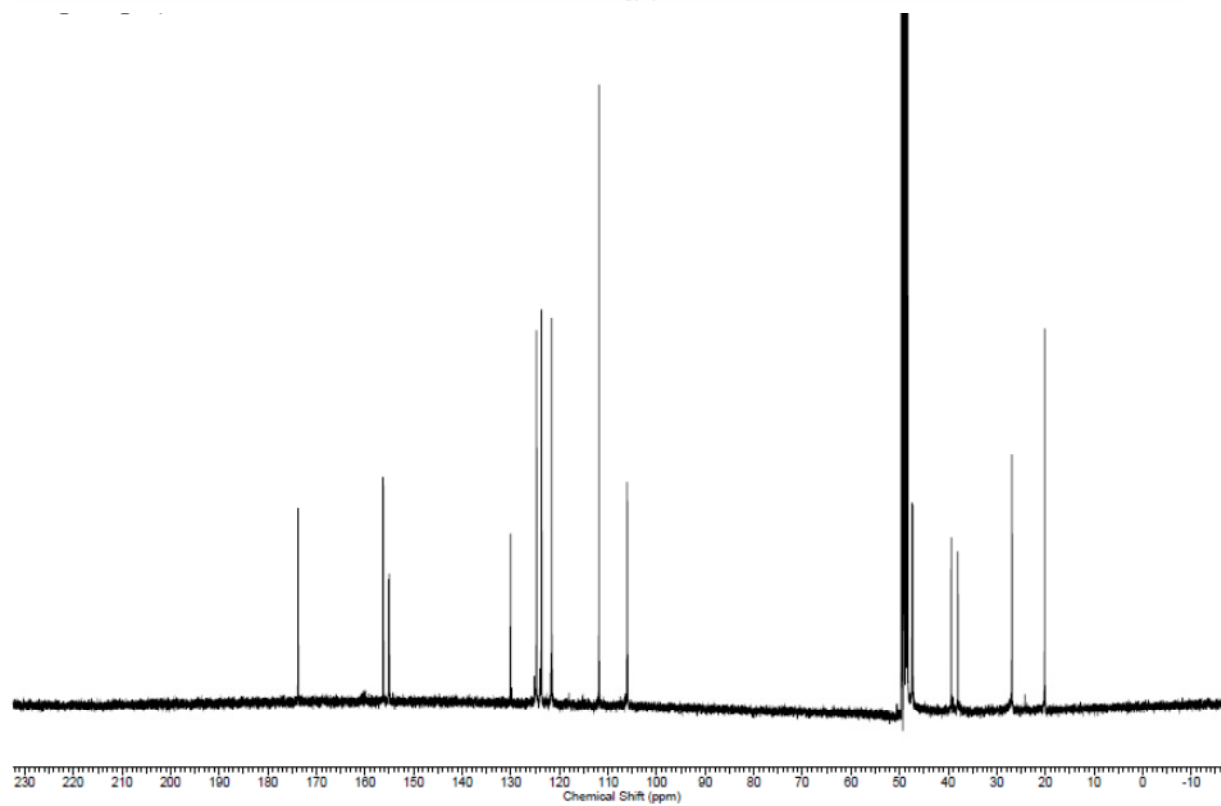



# HPLC-MS 13e

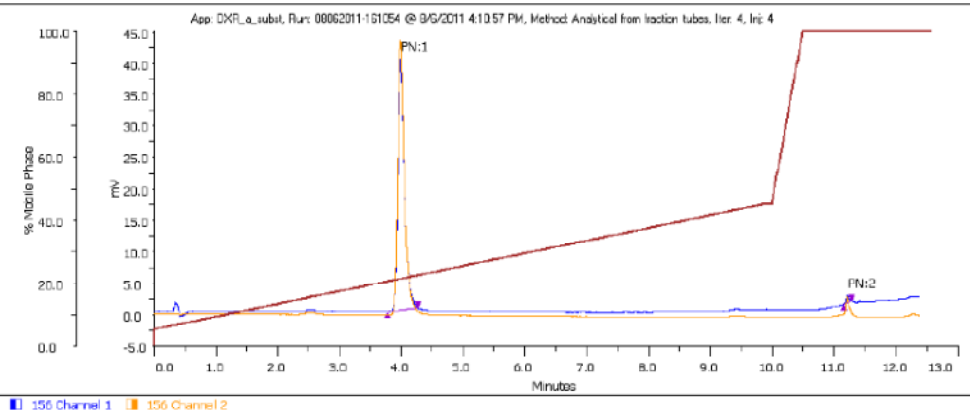

Sample Table

| Injection Number | Peak Name | Retention Time (min) | Area (uVmin x100) | Area % | Sample Name | Sample Location   | Fraction Site(s) |
|------------------|-----------|----------------------|-------------------|--------|-------------|-------------------|------------------|
| 4                | 1         | 3.993                | 491699.5849       | 98.967 | AN163-B     | Fraction Zone->16 |                  |
| 4                | 2         | 11.226               | 5130.833          | 1.033  | AN163-B     | Fraction Zone->16 |                  |

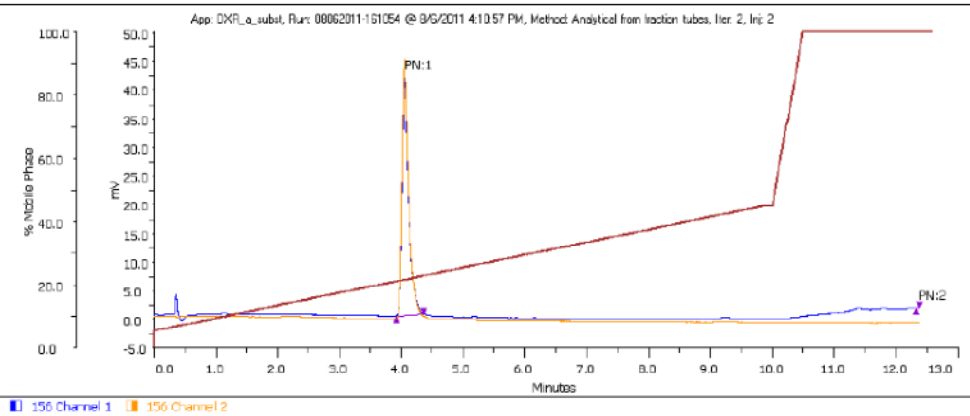

Sample Table

| Injection Number | Peak Name | Retention Time (min) | Area (uVmin x100) | Area % | Sample Name | Sample Location   | Fraction Site(s) |
|------------------|-----------|----------------------|-------------------|--------|-------------|-------------------|------------------|
| 2                | 1         | 4.056                | 524838.3324       | 99.992 | AN163-C18   | Fraction Zone->16 |                  |
| 2                | 2         | 12.355               | 39.9998           | 0.008  | AN163-C18   | Fraction Zone->16 |                  |

# $^1\text{H}$ NMR and $^{13}\text{C}$ NMR 13f

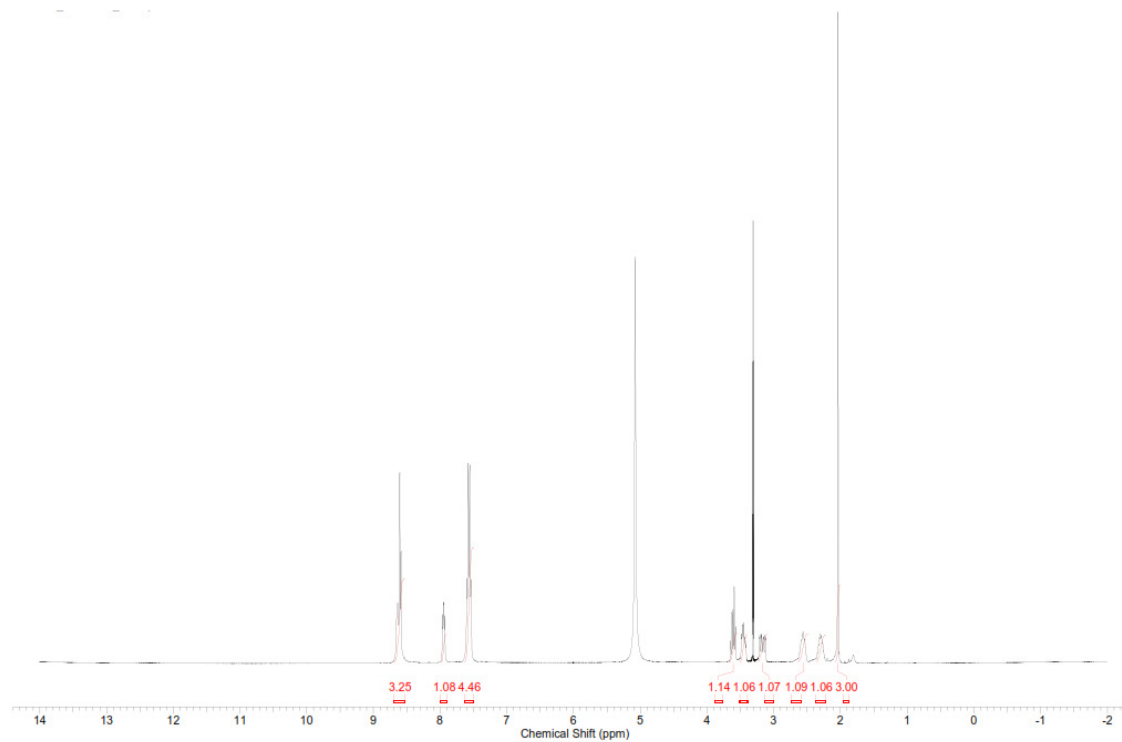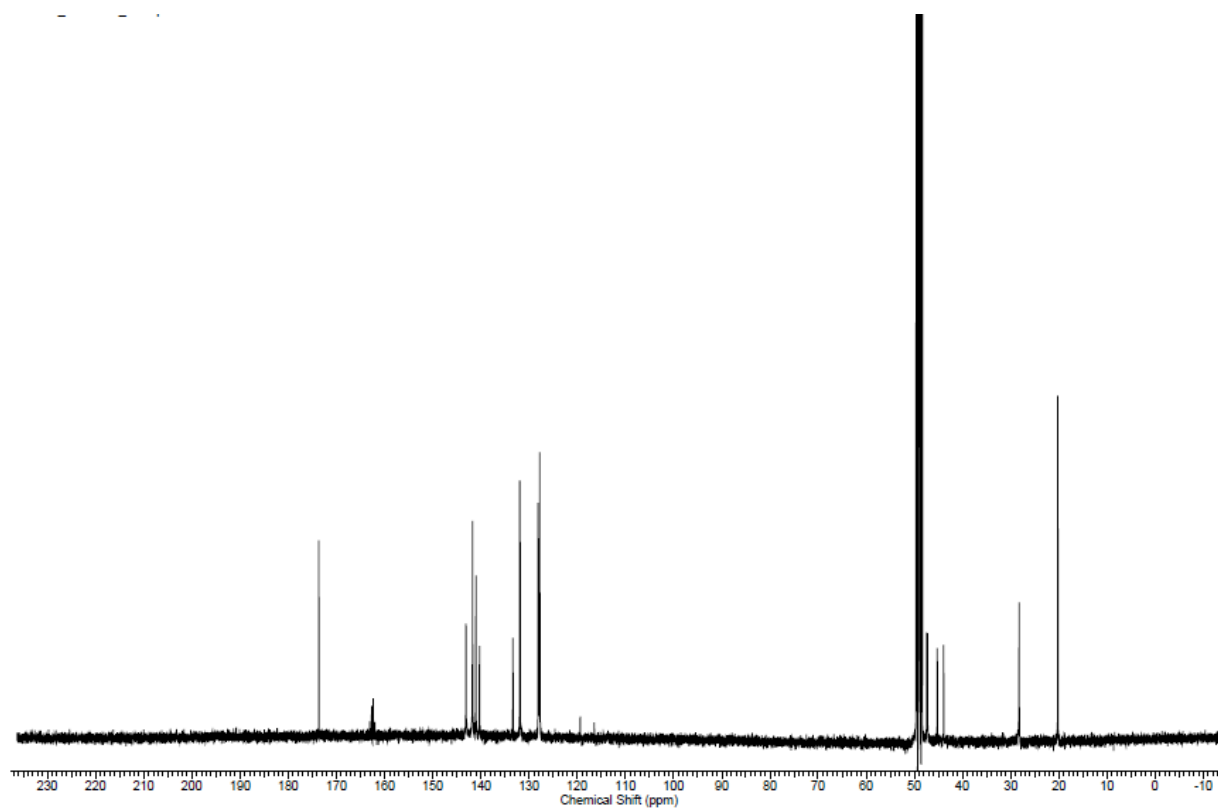

# HPLC-MS 13f

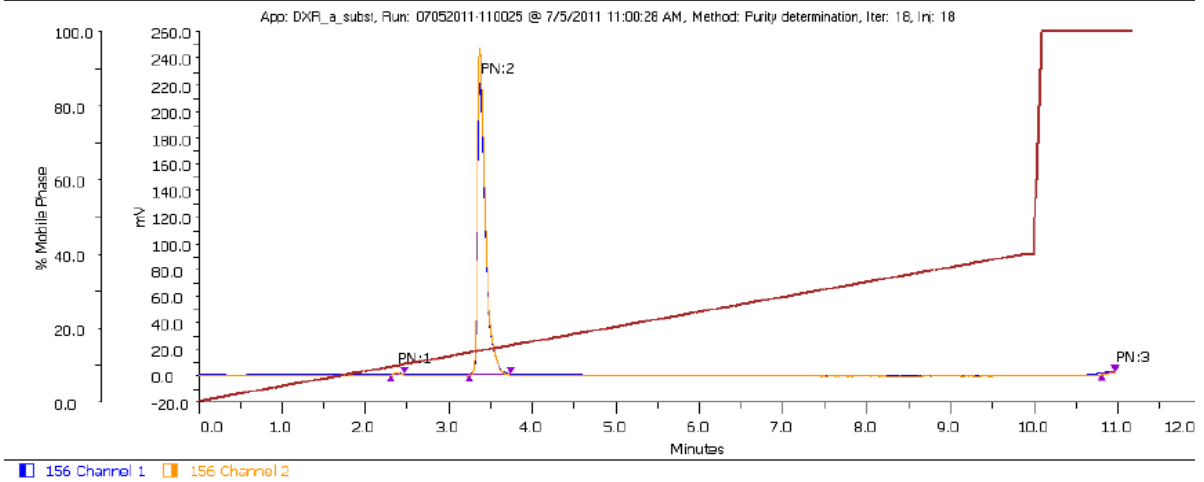

**Sample Table**

| Injection Number | Peak Name | Retention Time (min) | Area (uVmin x100) | Area % | Sample Name | Sample Location  | Fraction Site(s) |
|------------------|-----------|----------------------|-------------------|--------|-------------|------------------|------------------|
| 18               | 1         | 2.379                | 7543.3333         | 0.309  | AN167_b     | Sample Zone-->26 |                  |
| 18               | 2         | 3.378                | 2428355.8333      | 99.572 | AN167_b     | Sample Zone-->26 |                  |
| 18               | 3         | 10.904               | 2906.6667         | 0.119  | AN167_b     | Sample Zone-->26 |                  |

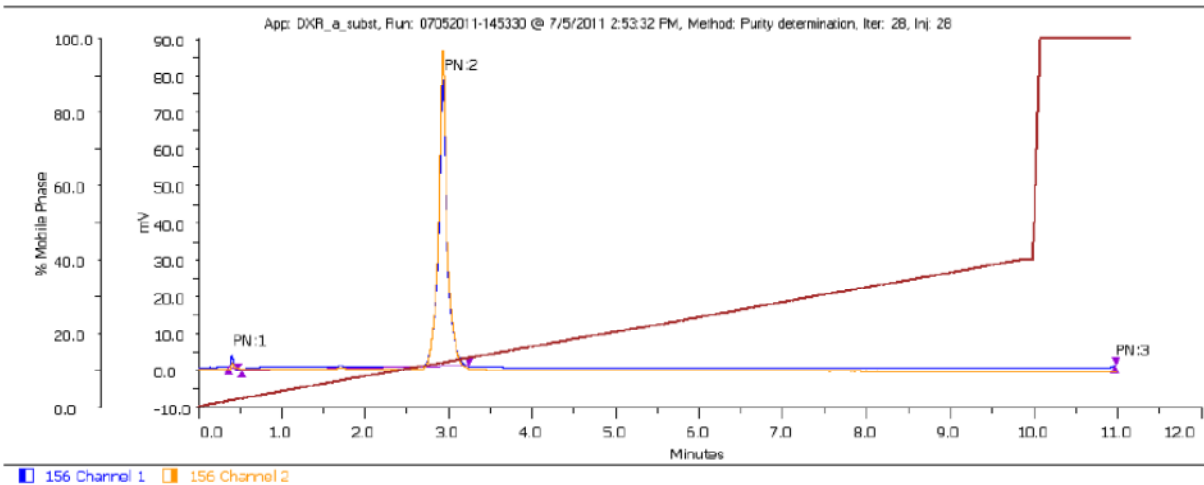

**Sample Table**

| Injection Number | Peak Name | Retention Time (min) | Area (uVmin x100) | Area % | Sample Name | Sample Location  | Fraction Site(s) |
|------------------|-----------|----------------------|-------------------|--------|-------------|------------------|------------------|
| 28               | 1         | 0.401                | 11255.8333        | 1.084  | AN167_C18   | Sample Zone-->19 |                  |
| 28               | 2         | 2.928                | 1027081.6667      | 98.916 | AN167_C18   | Sample Zone-->19 |                  |
| 28               | 3         | 10.908               | 1.6667            | 0      | AN167_C18   | Sample Zone-->19 |                  |

# $^1\text{H}$ NMR and $^{13}\text{C}$ NMR 13g

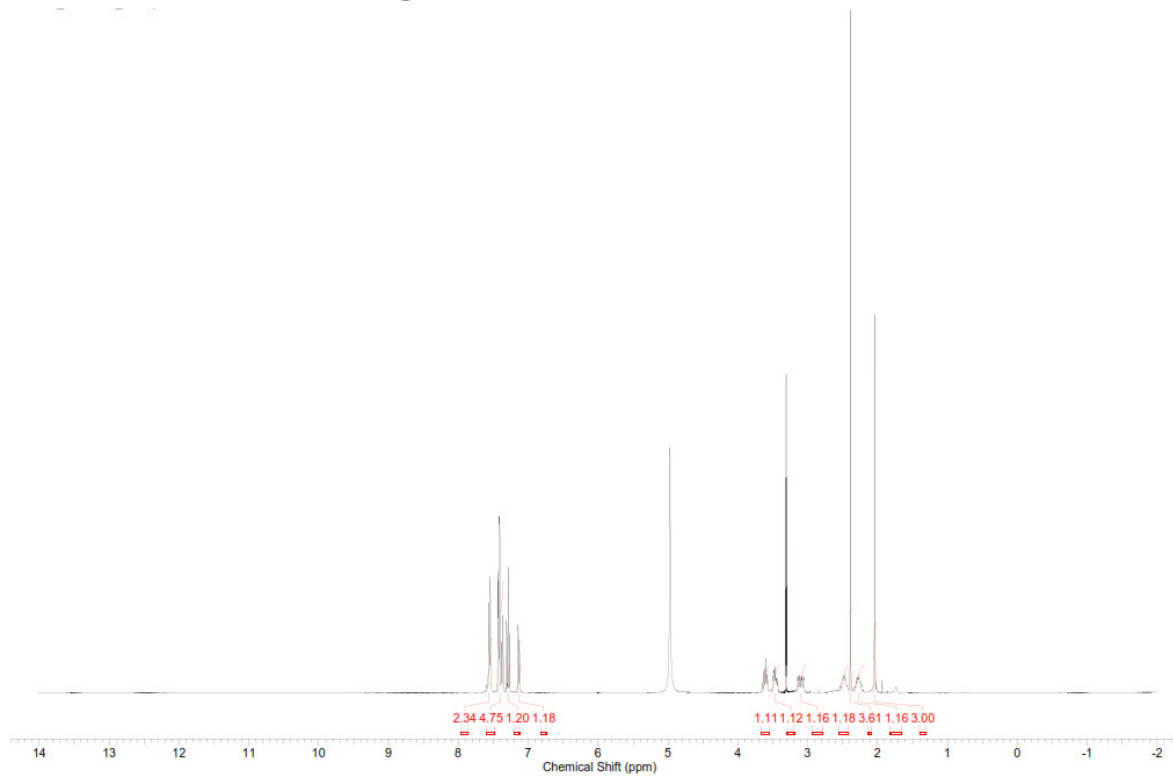

AN165a\_CARBON\_01.esp

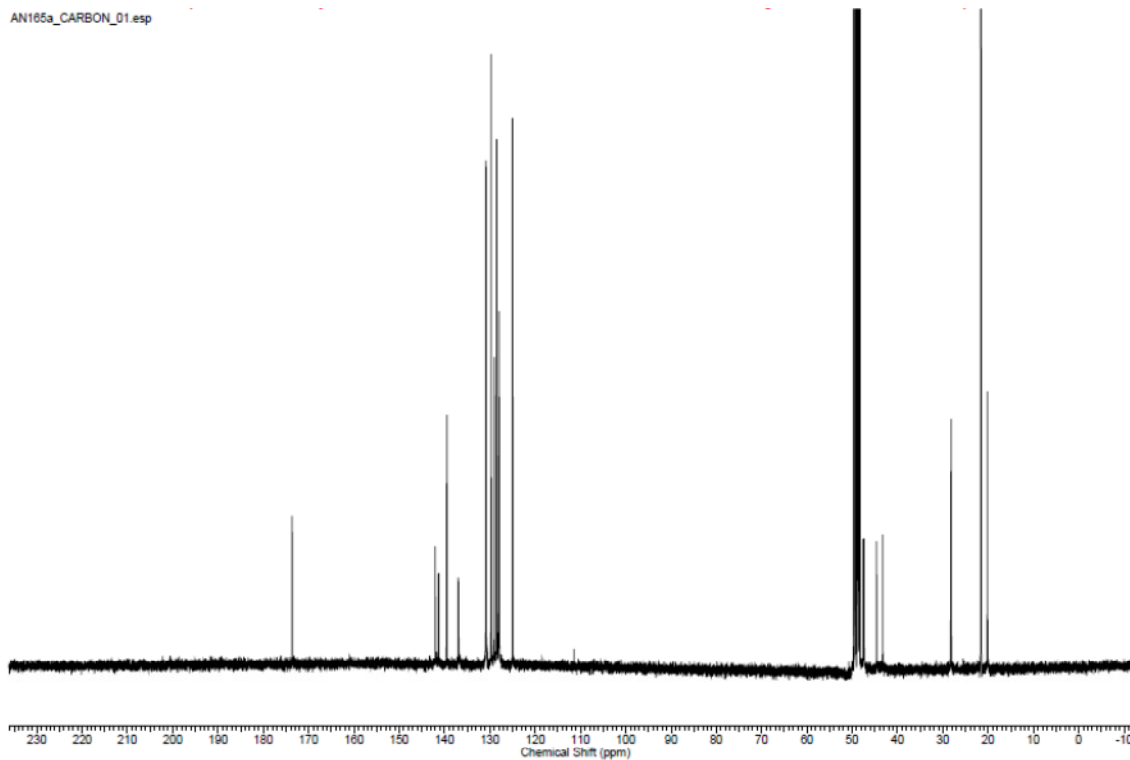

# HPLC-MS 13g

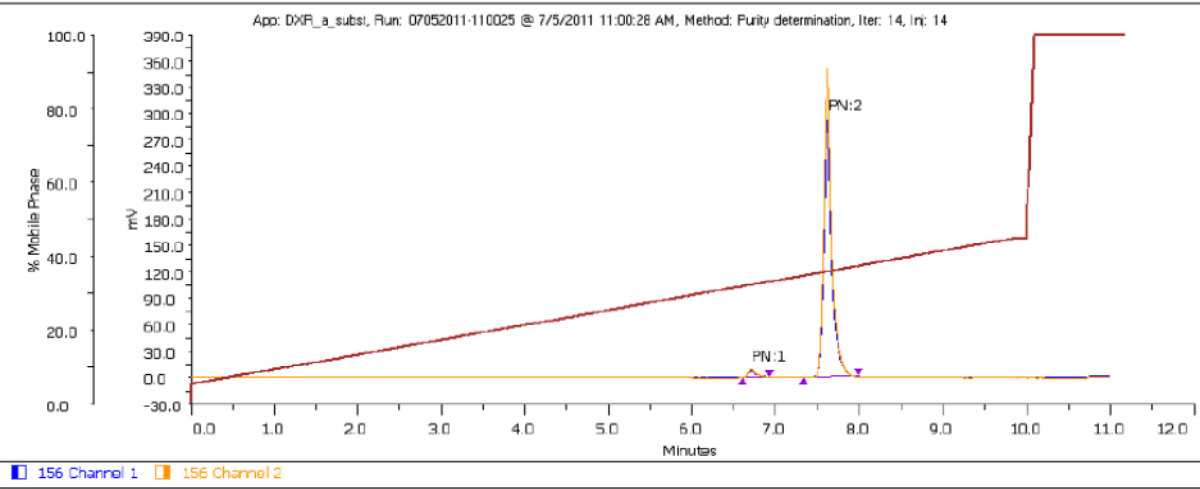

**Sample Table**

| Injection Number | Peak Name | Retention Time (min) | Area (uVmin x100) | Area % | Sample Name | Sample Location | Fraction Site(s) |
|------------------|-----------|----------------------|-------------------|--------|-------------|-----------------|------------------|
| 14               | 1         | 6.714                | 77273.75          | 2.314  | AN165_b     | Sample Zone->18 |                  |
| 14               | 2         | 7.627                | 3262549.1667      | 97.686 | AN165_b     | Sample Zone->18 |                  |

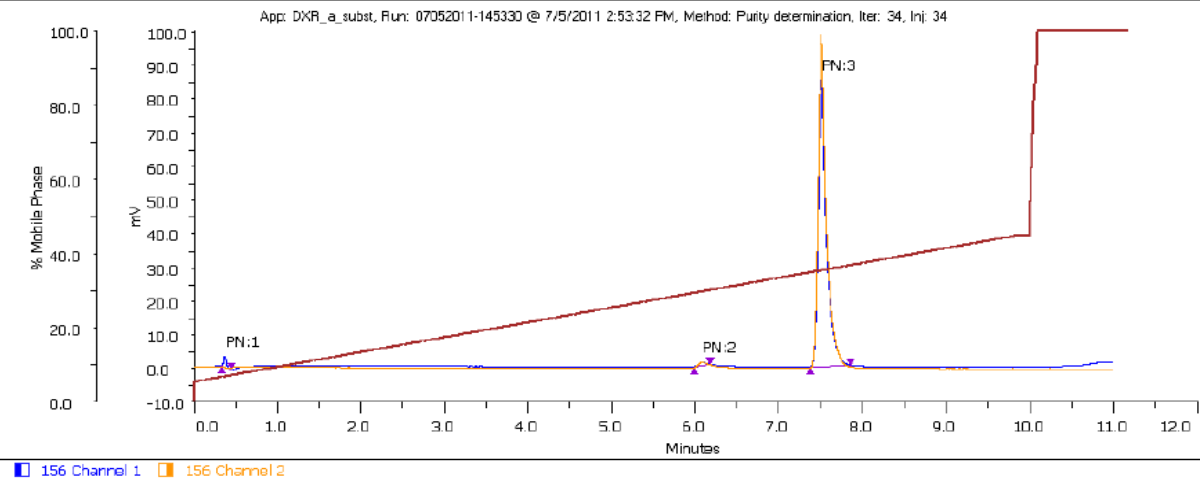

**Sample Table**

| Injection Number | Peak Name | Retention Time (min) | Area (uVmin x100) | Area % | Sample Name | Sample Location | Fraction Site(s) |
|------------------|-----------|----------------------|-------------------|--------|-------------|-----------------|------------------|
| 34               | 1         | 0.37                 | 11995.8333        | 1.197  | AN165_C18   | Sample Zone->31 |                  |
| 34               | 2         | 6.061                | 9588.3333         | 0.956  | AN165_C18   | Sample Zone->31 |                  |
| 34               | 3         | 7.517                | 980957.5          | 97.847 | AN165_C18   | Sample Zone->31 |                  |

# $^1\text{H}$ NMR and $^{13}\text{C}$ NMR 13h

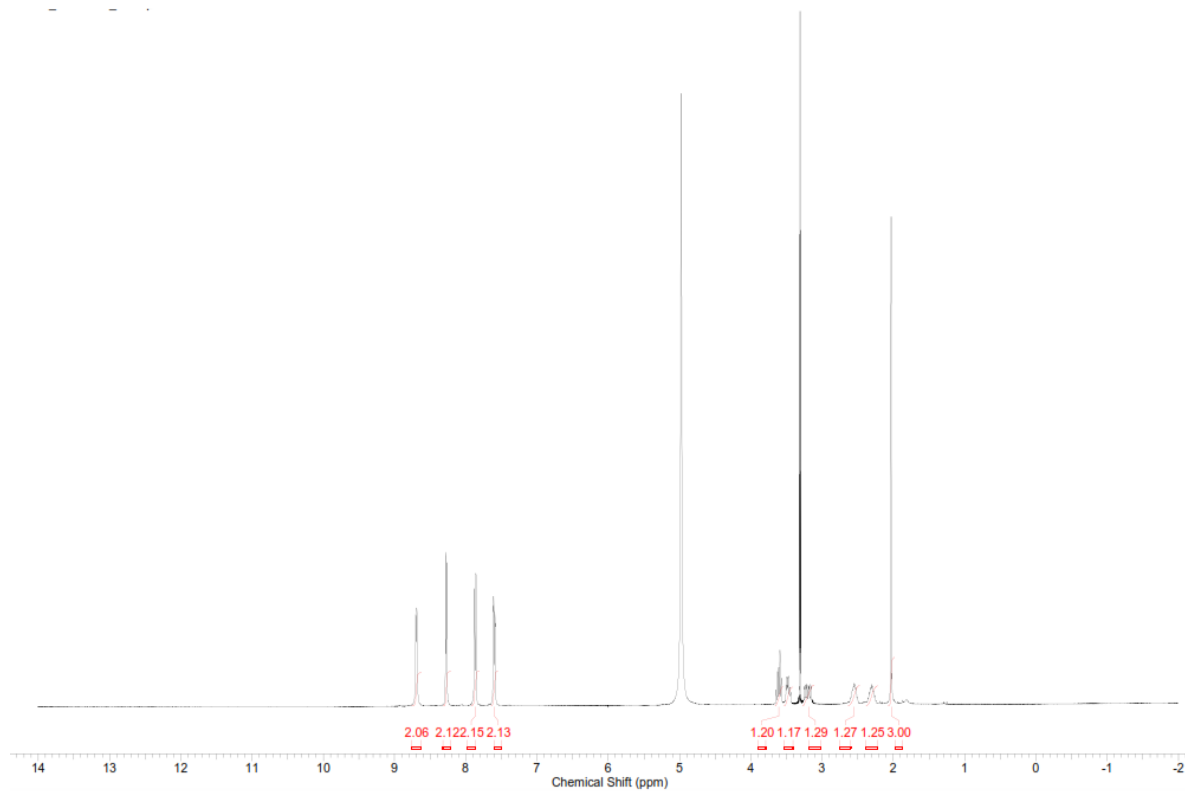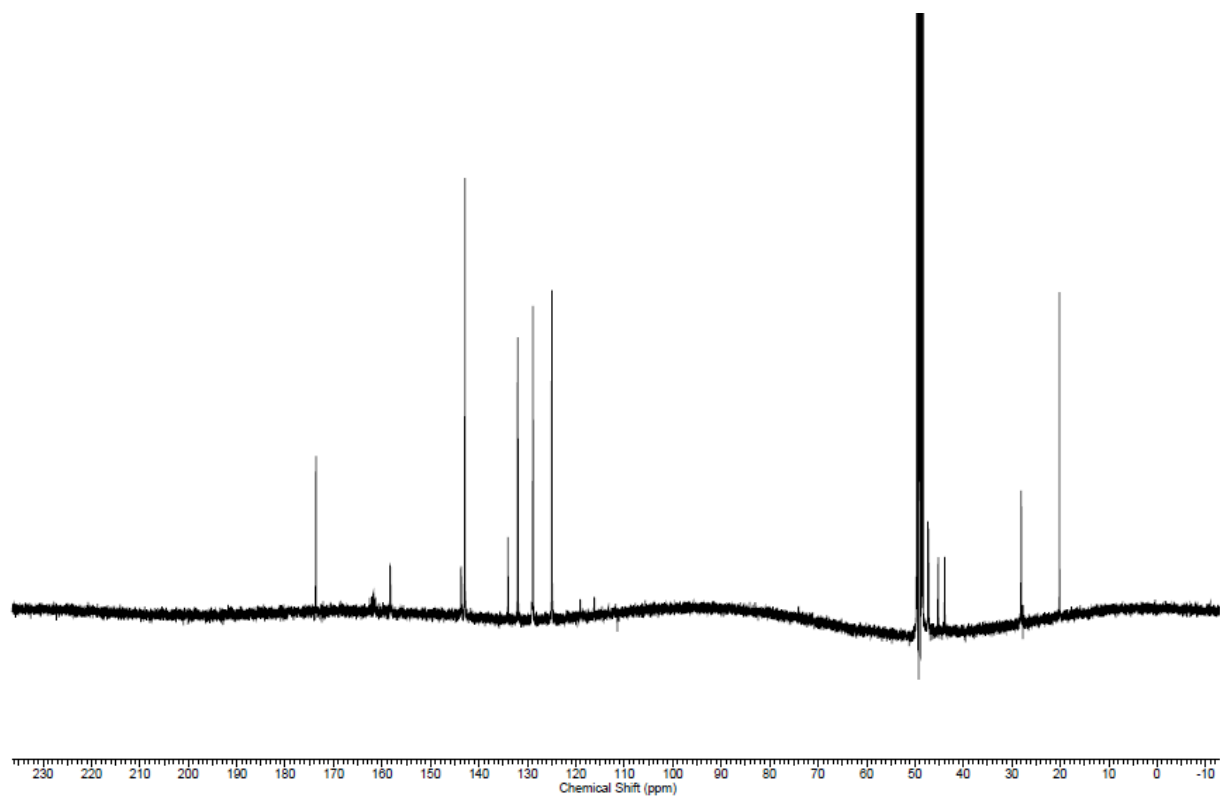

# HPLC-MS 13h

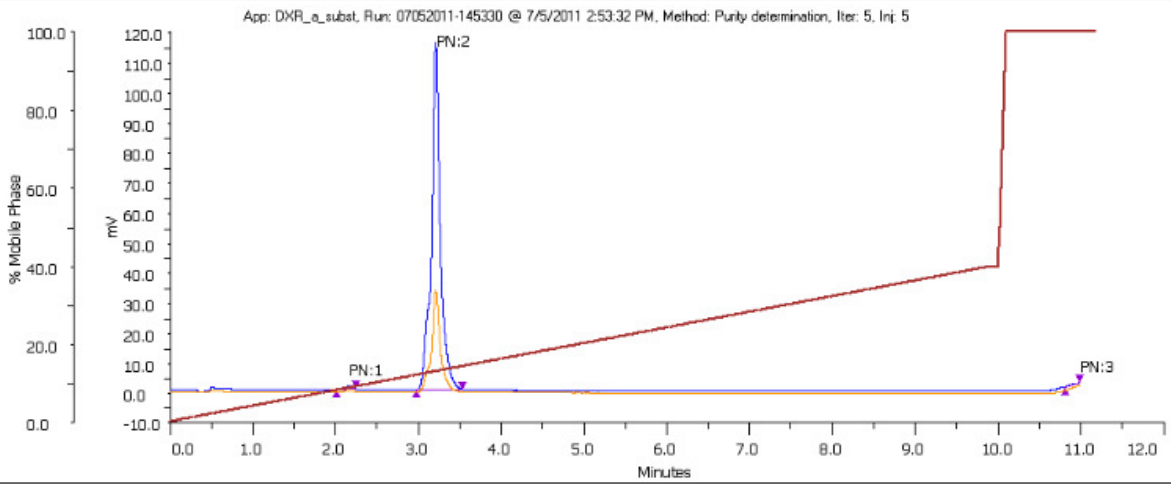

Sample Table

| Injection Number | Peak Name | Retention Time (min) | Area (uVmin x100) | Area % | Sample Name | Sample Location | Fraction Site(s) |
|------------------|-----------|----------------------|-------------------|--------|-------------|-----------------|------------------|
| 5                | 1         | 2.158                | 8697.5            | 0.597  | AN179_B     | Sample Zone->50 |                  |
| 5                | 2         | 3.213                | 1444770.4167      | 99.184 | AN179_B     | Sample Zone->50 |                  |
| 5                | 3         | 10.894               | 3182.0833         | 0.218  | AN179_B     | Sample Zone->50 |                  |

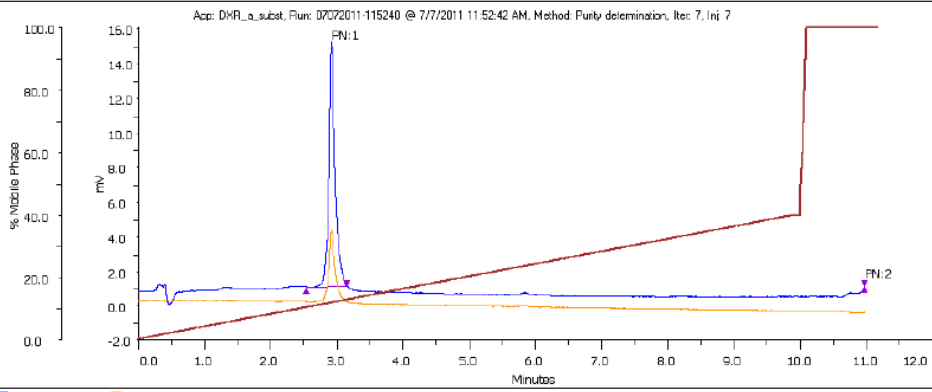

Sample Table

| Injection Number | Peak Name | Retention Time (min) | Area (uVmin x100) | Area % | Sample Name | Sample Location | Fraction Site(s) |
|------------------|-----------|----------------------|-------------------|--------|-------------|-----------------|------------------|
| 7                | 1         | 2.922                | 151603.111        | 99.999 | AN179_C18   | Sample Zone->10 |                  |
| 7                | 2         | 10.983               | 0.8333            | 0.001  | AN179_C18   | Sample Zone->10 |                  |

# <sup>1</sup>H NMR and <sup>13</sup>C NMR 13i

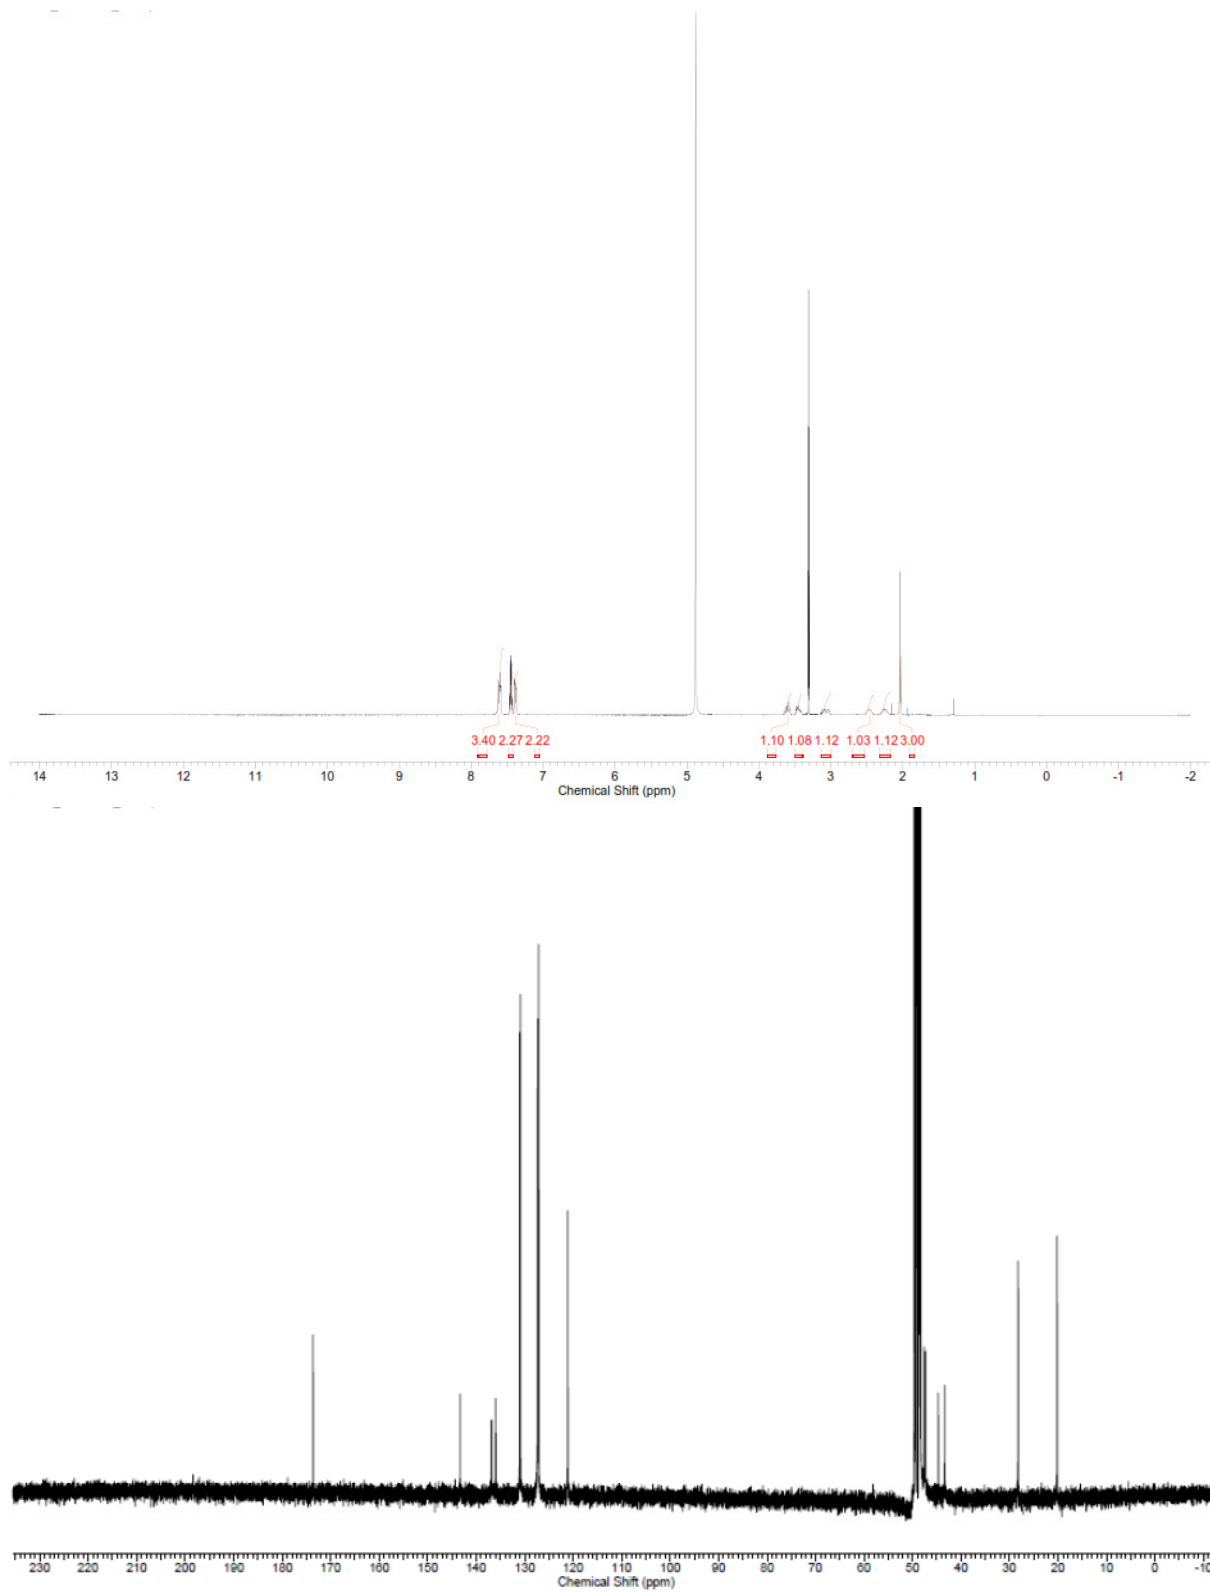



# HPLC-MS 13i

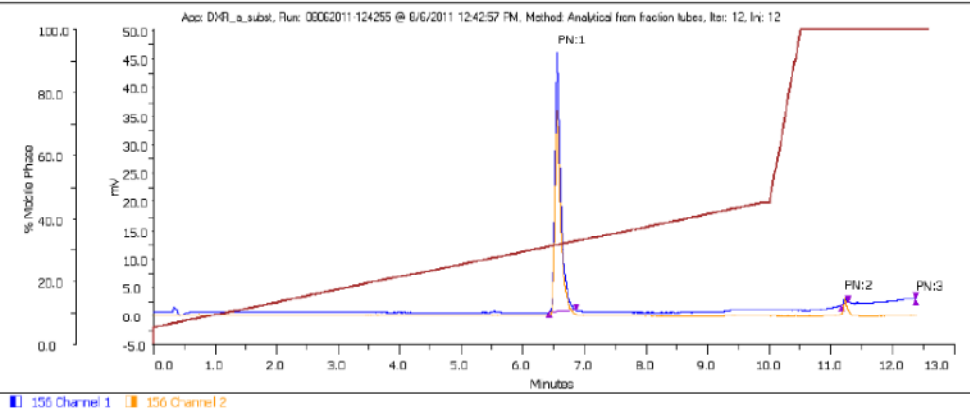

Sample Table

| Injection Number | Peak Name | Retention Time (min) | Area (uVmin x100) | Area % | Sample Name | Sample Location   | Fraction Site(s) |
|------------------|-----------|----------------------|-------------------|--------|-------------|-------------------|------------------|
| 12               | 1         | 6.566                | 499062.5003       | 98.984 | AN181-B     | Fraction Zone->33 |                  |
| 12               | 2         | 11.241               | 5122.9163         | 1.016  | AN181-B     | Fraction Zone->33 |                  |
| 12               | 3         | 12.395               | 0                 | 0      | AN181-B     | Fraction Zone->33 |                  |

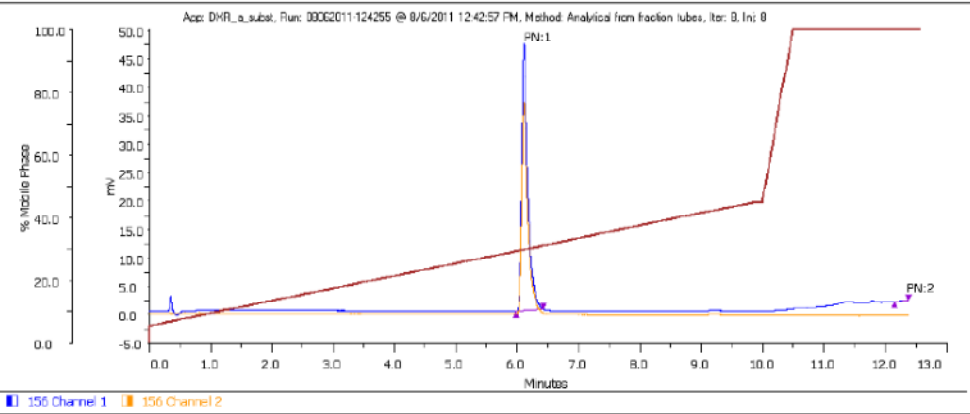

Sample Table

| Injection Number | Peak Name | Retention Time (min) | Area (uVmin x100) | Area % | Sample Name | Sample Location   | Fraction Site(s) |
|------------------|-----------|----------------------|-------------------|--------|-------------|-------------------|------------------|
| 8                | 1         | 6.117                | 540270.0003       | 99.938 | AN181-C18   | Fraction Zone->33 |                  |
| 8                | 2         | 12.364               | 335.8331          | 0.062  | AN181-C18   | Fraction Zone->33 |                  |

# $^1\text{H}$ NMR and $^{13}\text{C}$ NMR 13j

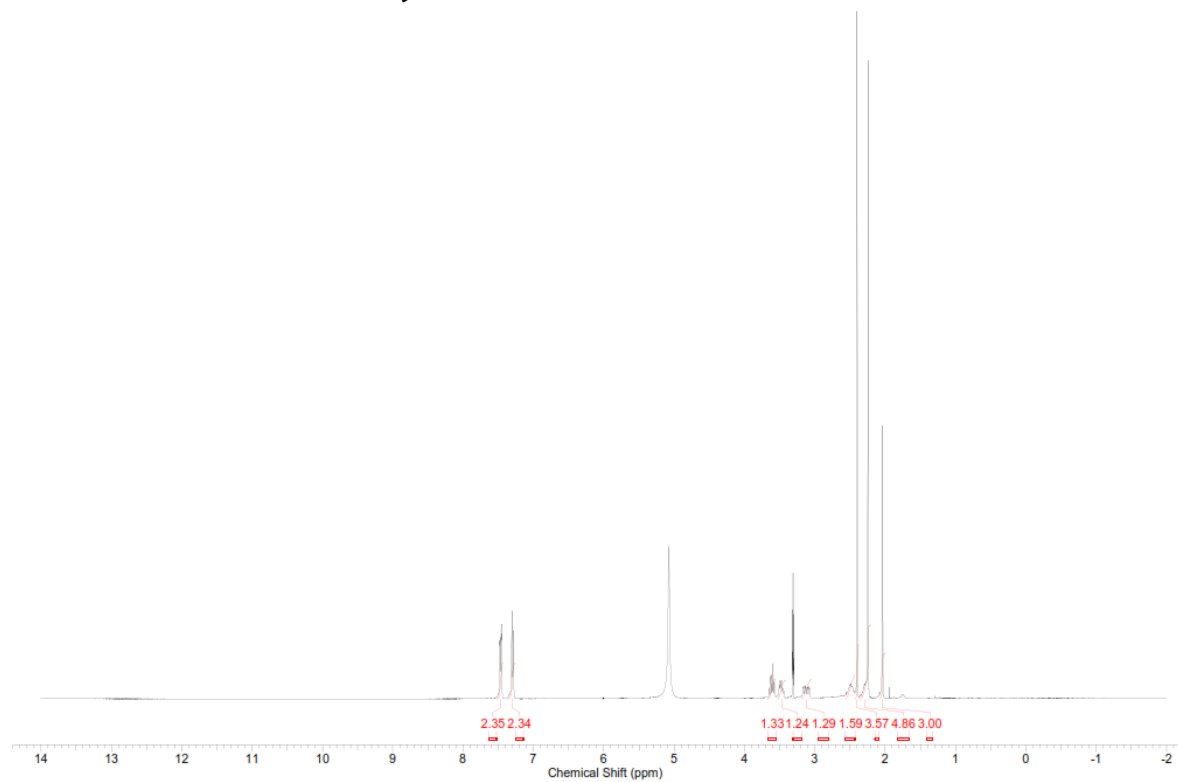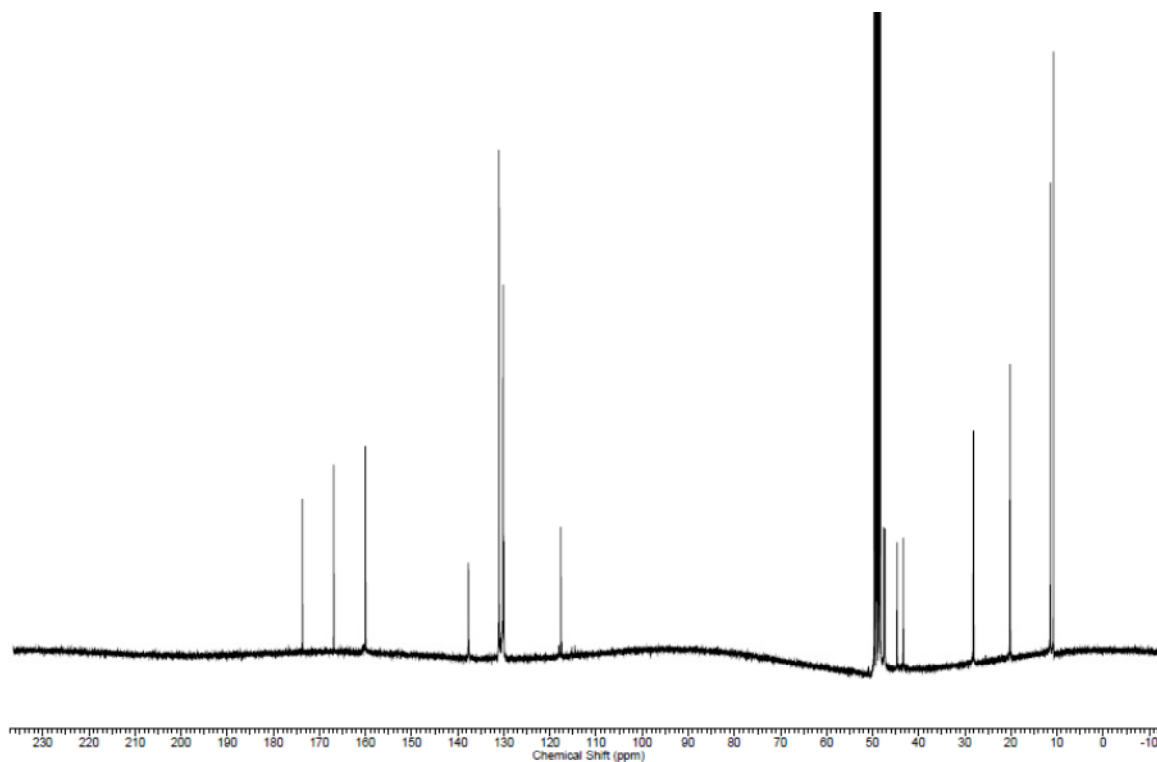

# HPLC-MS 13j

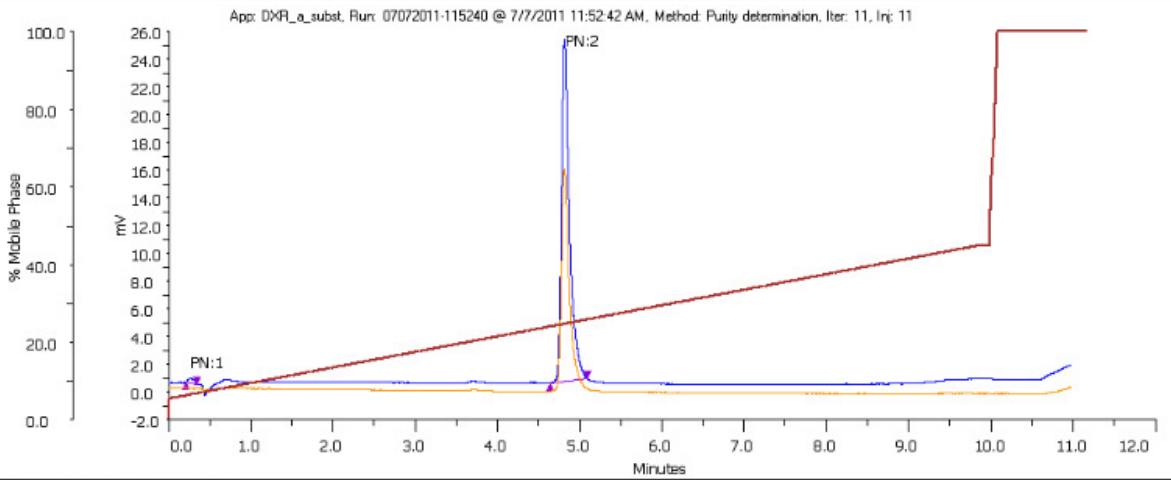

Sample Table

| Injection Number | Peak Name | Retention Time (min) | Area (uVmin x100) | Area % | Sample Name | Sample Location | Fraction Site(s) |
|------------------|-----------|----------------------|-------------------|--------|-------------|-----------------|------------------|
| 11               | 1         | 0.278                | 2915.8333         | 1.043  | AN178_b     | Sample Zone->6  |                  |
| 11               | 2         | 4.822                | 276706.6667       | 98.957 | AN178_b     | Sample Zone->6  |                  |

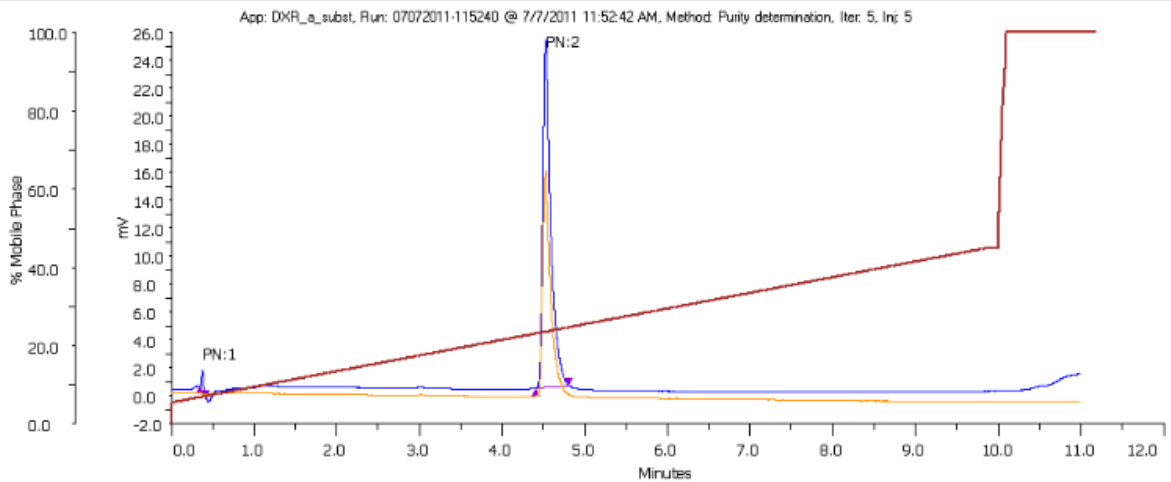

Sample Table

| Injection Number | Peak Name | Retention Time (min) | Area (uVmin x100) | Area % | Sample Name | Sample Location | Fraction Site(s) |
|------------------|-----------|----------------------|-------------------|--------|-------------|-----------------|------------------|
| 5                | 1         | 0.377                | 4395              | 1.562  | AN178_C18   | Sample Zone->6  |                  |
| 5                | 2         | 4.533                | 277000            | 98.438 | AN178_C18   | Sample Zone->6  |                  |

# $^1\text{H}$ NMR and $^{13}\text{C}$ NMR 13k

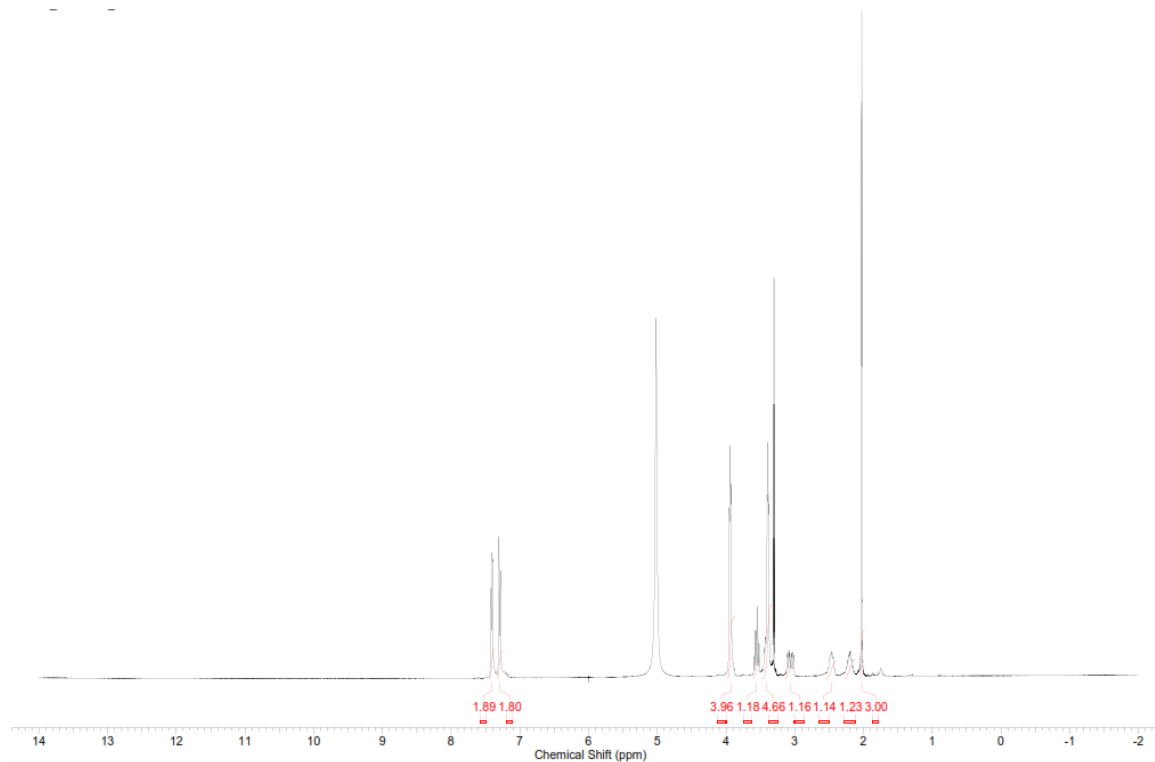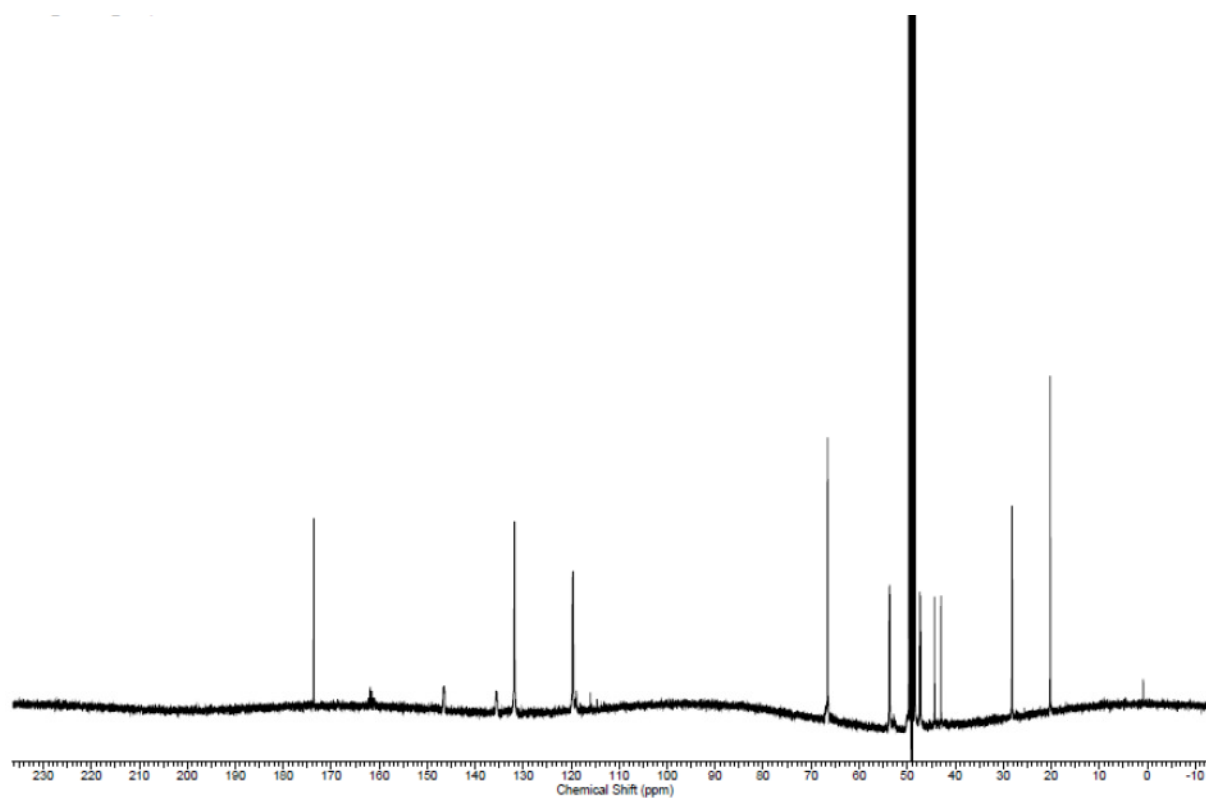

# HPLC-MS 13k

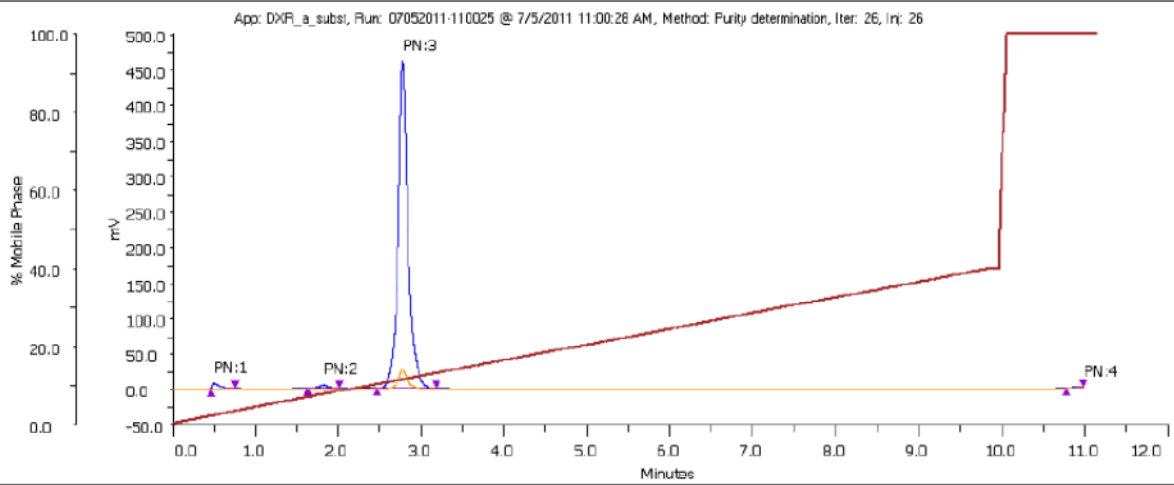

Sample Table

| Injection Number | Peak Name | Retention Time (min) | Area (uVmin x100) | Area % | Sample Name | Sample Location | Fraction Site(s) |
|------------------|-----------|----------------------|-------------------|--------|-------------|-----------------|------------------|
| 26               | 1         | 0.497                | 73138.3333        | 1.13   | AN182_b     | Sample Zone->42 |                  |
| 26               | 2         | 1.825                | 66913.75          | 1.034  | AN182_b     | Sample Zone->42 |                  |
| 26               | 3         | 2.777                | 6328840.8333      | 97.782 | AN182_b     | Sample Zone->42 |                  |
| 26               | 4         | 10.857               | 3514.1667         | 0.054  | AN182_b     | Sample Zone->42 |                  |

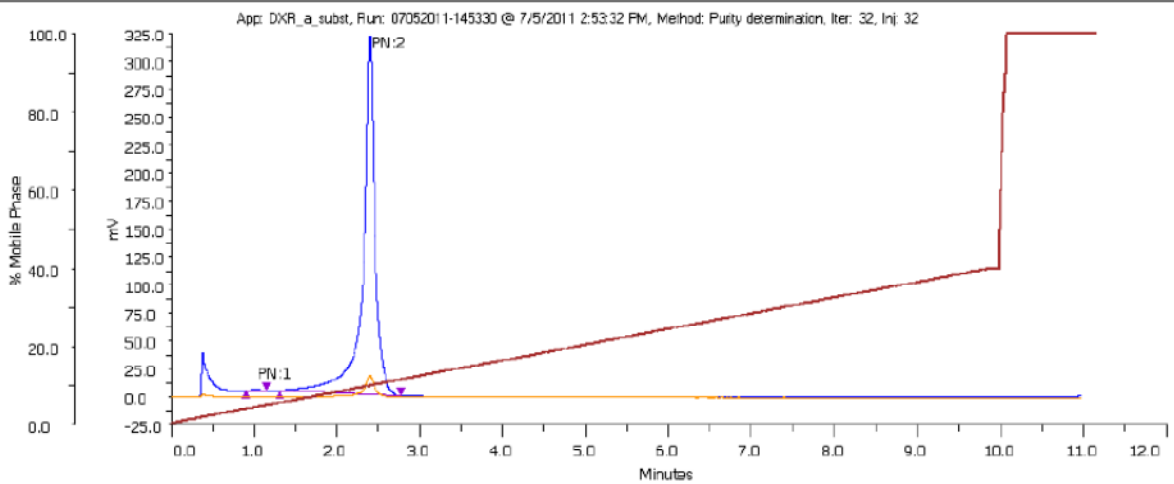

Sample Table

| Injection Number | Peak Name | Retention Time (min) | Area (uVmin x100) | Area % | Sample Name | Sample Location | Fraction Site(s) |
|------------------|-----------|----------------------|-------------------|--------|-------------|-----------------|------------------|
| 32               | 1         | 1.031                | 12507.4984        | 0.234  | AN182_C18   | Sample Zone->27 |                  |
| 32               | 2         | 2.4                  | 5334670.8186      | 99.766 | AN182_C18   | Sample Zone->27 |                  |
